# Supplementary material for: RNA demethylase ALKBH5 regulates cell cycle progression in DNA damage response
Source: Sci Rep. 2025 May 8;15:16059. doi: 10.1038/s41598-025-01207-8 (PMC12062394; doi:10.1038/s41598-025-01207-8)
Supplement: Supplementary file 1 — Supplementary Material 1 [file 41598_2025_1207_MOESM1_ESM.xlsx]

## Sheet: Table S1
Supplementary Table 1. The transcripts expression level in shCTL and shALKBH5 cells in response to X-ray treatment.
Genename	ENSG	ENST	RPKM_Total_CTL	RPKM_Total_shA5	RPKM_Nuc_CTL	RPKM_Nuc_shA5	RPKM_Cyto_CTL	RPKM_Cyto_shA5	Log2FC_Total(shA5/shCTL)	Log2FC_Nuc(shA5/shCTL)	Log2FC_Cyto(shA5/shCTL)	Group
A1BG	ENSG00000121410	ENST00000263100	0.740718	0.616952	1.31418	0.892702	1.25799	1.3735	-0.263766	-0.557911	0.126736	A5_target
A4GALT	ENSG00000128274	ENST00000401850	1.141	0.89898	2.18849	1.53729	1.89627	0.788421	-0.343936	-0.509548	-1.26613	A5_target
AAAS	ENSG00000094914	ENST00000209873	50.4768	48.1556	64.6306	54.4394	81.5584	66.3876	-0.067915	-0.247565	-0.29692	non_target
AACS	ENSG00000081760	ENST00000316519	10.7054	10.1583	15.3079	16.5219	11.8953	11.089	-0.0756811	0.110102	-0.101256	A5_target
AADAT	ENSG00000109576	ENST00000509167	9.58617	8.85069	6.16005	11.3008	3.19384	4.26354	-0.115165	0.875404	0.416761	non_target
AAGAB	ENSG00000103591	ENST00000261880	32.5422	36.0734	14.6469	12.5315	30.7047	37.6178	0.148624	-0.225042	0.292955	non_target
AAK1	ENSG00000115977	ENST00000409085	1.74564	1.97973	2.69346	3.29509	0.721163	0.954745	0.181552	0.290857	0.40479	non_target
AAMDC	ENSG00000087884	ENST00000533193	4.72439	3.3156	8.12006	2.71748	5.93127	4.41337	-0.510858	-1.57922	-0.426459	A5_target
AAMP	ENSG00000127837	ENST00000444053	119.86	119.345	79.895	82.0049	192.128	171.975	-0.006201	0.0376057	-0.159867	non_target
AAR2	ENSG00000131043	ENST00000397286	26.0227	26.0408	21.3306	23.4026	41.3805	35.6229	0.00100543	0.133745	-0.216145	non_target
AARS1	ENSG00000090861	ENST00000261772	100.188	96.2597	160.834	161.98	106.983	97.3846	-0.0577027	0.010239	-0.13561	non_target
AARS2	ENSG00000124608	ENST00000244571	18.274	21.8404	36.7556	38.3268	17.2454	16.2972	0.257205	0.0603869	-0.0815852	non_target
AARSD1	ENSG00000266967	ENST00000427569	5.25964	5.38611	0.962025	1.24757	8.22455	5.54523	0.034279	0.374975	-0.568691	non_target
AASDH	ENSG00000157426	ENST00000205214	7.33534	7.57468	4.78729	5.90166	1.74116	2.43712	0.0463209	0.301912	0.485128	A5_target
AASDHPPT	ENSG00000149313	ENST00000278618	40.7408	38.9327	9.3508	9.42328	13.0166	19.7384	-0.0654913	0.0111402	0.600657	non_target
AASS	ENSG00000008311	ENST00000417368	7.92542	9.85721	8.12064	7.82168	0.856322	1.35326	0.314693	-0.0541164	0.660215	A5_target
AATF	ENSG00000275700	ENST00000619387	72.1646	69.4836	77.0576	90.2462	66.844	77.2424	-0.0546186	0.227928	0.208595	non_target
AATK	ENSG00000181409	ENST00000326724	0.576685	0.495287	3.13922	2.01037	0.805941	0.567075	-0.219519	-0.642947	-0.507136	A5_target
ABAT	ENSG00000183044	ENST00000567812	1.75374	2.16965	2.5929	1.68126	1.0859	1.79637	0.307027	-0.625025	0.726198	non_target
ABCA1	ENSG00000165029	ENST00000374736	0.116907	0.126224	0.244019	0.210965	0.0422871	0.0473359	0.11063	-0.209987	0.162715	non_target
ABCA2	ENSG00000107331	ENST00000614293	8.25927	9.60058	33.1654	24.1581	9.46417	6.84291	0.217107	-0.457173	-0.467867	A5_target
ABCA3	ENSG00000167972	ENST00000301732	4.2498	4.44805	8.6556	8.85506	7.48874	5.02117	0.0657757	0.0328692	-0.576699	A5_target
ABCA5	ENSG00000154265	ENST00000392676	1.62196	2.12583	1.13491	0.964554	0.222231	0.127936	0.390284	-0.234649	-0.796643	non_target
ABCA7	ENSG00000064687	ENST00000263094	3.7809	4.45644	22.663	20.4591	3.9072	2.39597	0.237162	-0.147599	-0.705522	non_target
ABCB1	ENSG00000085563	ENST00000622132	1.18259	1.18776	1.95177	1.21282	0.197302	0.378614	0.00629326	-0.686425	0.940323	non_target
ABCB10	ENSG00000135776	ENST00000344517	25.1778	23.1897	12.5543	12.4854	7.64066	11.3513	-0.118669	-0.0079435	0.571089	non_target
ABCB4	ENSG00000005471	ENST00000265723	0.142437	0.0961181	0.552805	0.477925	0.145978	0.0525237	-0.567442	-0.209987	-1.47471	non_target
ABCB6	ENSG00000115657	ENST00000265316	8.07014	9.10232	20.9337	21.8283	11.0523	8.69143	0.17364	0.0603705	-0.346687	non_target
ABCB7	ENSG00000131269	ENST00000645829	10.4588	11.3578	7.66441	8.02123	4.53609	7.60158	0.118969	0.0656472	0.744852	non_target
ABCB8	ENSG00000197150	ENST00000297504	9.43966	9.94341	27.7003	23.5067	13.5677	9.98984	0.075006	-0.236829	-0.441643	non_target
ABCB9	ENSG00000150967	ENST00000442028	3.25938	3.47847	6.1839	6.86344	5.25199	3.66822	0.0938542	0.150415	-0.517783	A5_target
ABCC1	ENSG00000103222	ENST00000399410	19.8194	18.8445	29.482	30.257	17.4588	15.6801	-0.0727755	0.0374373	-0.155025	A5_target
ABCC10	ENSG00000124574	ENST00000372530	6.30162	6.98775	16.3046	16.7085	5.93466	4.14503	0.149104	0.0352993	-0.517783	A5_target
ABCC11	ENSG00000121270	ENST00000394747	0.0883272	0.222523	0.424423	0.225805	0.0452617	0.0289517	1.33302	-0.910427	-0.644639	non_target
ABCC2	ENSG00000023839	ENST00000647814	0.616384	0.638889	1.25762	1.70182	0.113708	0.133345	0.0517362	0.436376	0.22983	non_target
ABCC4	ENSG00000125257	ENST00000645237	12.1389	10.8626	11.1155	9.79731	3.88382	4.71215	-0.160271	-0.182108	0.278908	A5_target
ABCC5	ENSG00000114770	ENST00000334444	12.201	13.4271	20.1776	19.9094	7.63947	9.2262	0.138138	-0.0193037	0.272265	A5_target
ABCC8	ENSG00000006071	ENST00000644772	0.509713	0.695163	4.46216	2.98332	0.164964	0.17147	0.447665	-0.580825	0.0558002	non_target
ABCC9	ENSG00000069431	ENST00000261200	0.768133	0.969132	2.71798	2.84626	0.088453	0.0763819	0.335336	0.0665304	-0.21168	A5_target
ABCD1	ENSG00000101986	ENST00000218104	2.00931	2.04308	6.48954	4.4884	3.19887	2.47458	0.0240422	-0.531915	-0.370378	A5_target
ABCD3	ENSG00000117528	ENST00000370214	29.5314	30.4913	8.58855	9.29101	7.97858	10.2721	0.0461467	0.11342	0.364532	non_target
ABCD4	ENSG00000119688	ENST00000356924	11.1312	12.4257	29.6548	27.5822	9.66775	11.1312	0.158724	-0.104527	0.203357	non_target
ABCE1	ENSG00000164163	ENST00000296577	71.5745	71.1952	15.8857	13.3455	27.8357	25.2773	-0.00766467	-0.251371	-0.139093	A5_target
ABCF1	ENSG00000204574	ENST00000326195	78.7004	81.977	88.3876	102.773	74.7113	86.7318	0.0588474	0.217551	0.215234	non_target
ABCF2	ENSG00000033050	ENST00000287844	16.1426	16.1659	12.097	18.7948	19.4768	18.9364	0.00208339	0.635685	-0.0405997	A5_target
ABCF2	ENSG00000033050	ENST00000287844	16.1426	16.1659	12.097	18.7948	19.4768	18.9364	0.00208339	0.635685	-0.0405997	A5_target
ABCF3	ENSG00000161204	ENST00000429586	18.5483	18.7013	35.57	31.7978	23.6779	21.7261	0.0118518	-0.161732	-0.124117	A5_target
ABCG1	ENSG00000160179	ENST00000398437	0.102985	0.244624	0.548146	0.55288	0.358855	0.405075	1.24813	0.0124051	0.174788	non_target
ABCG2	ENSG00000118777	ENST00000650821	0.546709	0.638142	0.393231	0.396626	0.530015	0.523068	0.223105	0.0124051	-0.019035	non_target
ABCG4	ENSG00000172350	ENST00000619701	1.23922	1.35826	5.70477	3.16802	0.731232	0.480043	0.132325	-0.848588	-0.607165	A5_target
ABHD1	ENSG00000143994	ENST00000316470	0.252023	0.217687	0.894276	1.93286	0.671552	0.446081	-0.211298	1.11194	-0.590192	non_target
ABHD10	ENSG00000144827	ENST00000273359	23.171	21.13	12.923	9.69694	12.5074	16.5143	-0.133025	-0.414346	0.400936	A5_target
ABHD11	ENSG00000106077	ENST00000222800	18.4366	15.4245	14.985	15.5463	23.7919	18.8887	-0.257346	0.0530471	-0.332945	non_target
ABHD12	ENSG00000100997	ENST00000376542	21.2863	19.6995	13.0852	13.2272	35.863	32.9817	-0.111763	0.0155724	-0.120833	A5_target
ABHD13	ENSG00000139826	ENST00000375898	2.90986	2.64724	0.657284	0.516592	0.869811	1.05977	-0.136463	-0.347491	0.284971	non_target
ABHD14A	ENSG00000248487	ENST00000273596	6.11002	3.8422	8.33875	10.2989	10.8724	8.71518	-0.669244	0.304586	-0.319064	A5_target
ABHD14B	ENSG00000114779	ENST00000483233	12.4629	9.54711	13.9742	11.7475	15.9124	13.1795	-0.384501	-0.250402	-0.271862	non_target
ABHD15	ENSG00000168792	ENST00000307201	5.0012	4.75801	7.0003	6.20927	5.52466	5.56282	-0.0719146	-0.172993	0.0099285	A5_target
ABHD16A	ENSG00000204427	ENST00000395952	12.1282	11.1795	22.8025	19.5749	17.3274	12.5669	-0.117516	-0.220183	-0.463431	non_target
ABHD17A	ENSG00000129968	ENST00000250974	22.8775	19.6753	101.96	82.1712	38.0721	27.505	-0.217542	-0.311296	-0.469041	non_target
ABHD17B	ENSG00000107362	ENST00000377041	8.78315	8.77634	6.41228	7.32187	3.80189	7.99304	-0.00111844	0.191375	1.07203	non_target
ABHD17C	ENSG00000136379	ENST00000258884	10.4285	10.4086	6.25255	4.53374	7.86048	9.77772	-0.00275188	-0.463744	0.314881	A5_target
ABHD18	ENSG00000164074	ENST00000645843	3.29191	3.60732	2.17929	2.68483	1.13298	1.40111	0.132004	0.300975	0.306451	A5_target
ABHD2	ENSG00000140526	ENST00000352732	9.90692	9.67822	5.97325	6.84209	5.64262	7.79512	-0.0336949	0.195919	0.466206	non_target
ABHD3	ENSG00000158201	ENST00000289119	12.2407	12.1879	7.04094	7.84573	4.84448	8.22103	-0.00623384	0.156141	0.762977	non_target
ABHD4	ENSG00000100439	ENST00000428304	5.95391	6.17589	4.57433	6.11554	6.88648	6.3147	0.0528093	0.418919	-0.125053	A5_target
ABHD5	ENSG00000011198	ENST00000644371	5.80918	6.25758	2.78639	1.96861	4.12599	4.45033	0.107271	-0.501219	0.109172	A5_target
ABHD6	ENSG00000163686	ENST00000295962	6.22127	6.13581	5.43928	5.96415	7.41817	8.20581	-0.0199542	0.1329	0.145581	A5_target
ABHD8	ENSG00000127220	ENST00000247706	1.29689	1.36241	2.56524	3.36025	1.68837	1.75782	0.0711016	0.389475	0.0581595	A5_target
ABI1	ENSG00000136754	ENST00000376142	12.4695	12.6853	8.96652	8.59623	5.90771	8.44344	0.0247583	-0.0608438	0.515232	A5_target
ABI2	ENSG00000138443	ENST00000295851	3.63734	3.70633	2.48483	2.21675	1.45117	1.97997	0.0271066	-0.164706	0.448263	non_target
ABI3BP	ENSG00000154175	ENST00000471714	0.211041	0.205075	0.491437	0.566492	0.0648864	0.051881	-0.0413732	0.20505	-0.322711	non_target
ABITRAM	ENSG00000119328	ENST00000322940	15.6628	16.6672	3.92451	3.60949	4.97774	8.70053	0.0896703	-0.12072	0.805613	A5_target
ABL1	ENSG00000097007	ENST00000372348	14.2878	16.1418	23.9737	27.3657	20.6607	18.8464	0.176016	0.190916	-0.132601	A5_target
ABL2	ENSG00000143322	ENST00000502732	7.95598	10.279	7.86069	9.25594	3.47046	5.7552	0.369586	0.235722	0.729738	A5_target
ABLIM1	ENSG00000099204	ENST00000649363	5.44181	5.75974	6.3018	5.65378	3.1045	4.87663	0.0819186	-0.156548	0.651526	A5_target
ABLIM2	ENSG00000163995	ENST00000545242	0.108886	0.235129	0.563458	0.139181	0.446374	0.356905	1.11063	-2.01734	-0.322711	non_target
ABLIM3	ENSG00000173210	ENST00000506113	0.438627	0.422844	0.590606	0.360427	0.433478	0.3697	-0.0528688	-0.712488	-0.229602	non_target
ABR	ENSG00000159842	ENST00000574437	11.4215	10.7359	15.2476	12.0229	12.3481	12.6625	-0.0893077	-0.342799	0.0362788	A5_target
ABRACL	ENSG00000146386	ENST00000367660	36.0618	26.0891	7.30745	6.31762	36.4894	35.3709	-0.467028	-0.209987	-0.0449178	A5_target
ABRAXAS1	ENSG00000163322	ENST00000321945	2.83918	2.40464	0.565561	0.717131	0.696951	0.785734	-0.239651	0.342554	0.172984	non_target
ABRAXAS2	ENSG00000165660	ENST00000298492	15.1627	15.325	8.37987	10.4956	3.77321	6.00209	0.0153679	0.324789	0.669675	non_target
ABT1	ENSG00000146109	ENST00000274849	41.3444	42.5126	22.7071	25.6466	63.7081	66.3162	0.0401982	0.175624	0.0578828	A5_target
ABTB1	ENSG00000114626	ENST00000232744	1.4957	2.00878	8.73765	6.0153	1.68243	1.36315	0.425503	-0.53861	-0.303603	A5_target
ABTB2	ENSG00000166016	ENST00000435224	3.86692	4.11209	8.25223	9.79234	4.65099	4.72081	0.0886874	0.24687	0.021496	non_target
AC000095.3	ENSG00000286025	ENST00000652053	0.0832746	0.0899115	0.184682	0.478997	0.0853451	0.0818868	0.11063	1.37498	-0.059677	non_target
AC002316.1	ENSG00000132359	ENST00000637138	5.16238	4.94098	12.2988	10.9786	6.72316	5.83004	-0.0632379	-0.163817	-0.205633	non_target
AC004080.3	ENSG00000257184	ENST00000470747	4.21026	4.34378	2.48995	2.15267	4.60261	3.58809	0.0450416	-0.209987	-0.359237	non_target
AC004151.1	ENSG00000180448	ENST00000590214	0.802673	0.829767	3.14362	2.4231	1.2427	0.990819	0.0478942	-0.375573	-0.326781	A5_target
AC004593.2	ENSG00000285162	ENST00000644824	0.0850558	0.0459174	0.125755	0.0543604	0.0726422	0.0278795	-0.88937	-1.20999	-1.38161	non_target
AC004706.3	ENSG00000282936	ENST00000634965	0.5616	0.893583	4.75252	4.1371	0.302928	0.188925	0.670057	-0.200072	-0.681165	A5_target
AC005261.1	ENSG00000131845	ENST00000443917	3.96815	4.71741	4.21294	3.96603	2.29299	2.61519	0.249528	-0.0871305	0.189683	A5_target
AC005747.1	ENSG00000007237	ENST00000432992	0.99369	0.68416	0.990092	0.828367	1.15123	1.01961	-0.538463	-0.257293	-0.175154	non_target
AC006059.2	ENSG00000280571	ENST00000648550	3.49175	3.43617	0.6858	1.28463	2.8655	3.23084	-0.0231519	0.90549	0.173125	non_target
AC007040.2	ENSG00000258881	ENST00000606025	0.755223	1.00073	2.5504	3.15931	0.5805	0.506343	0.406086	0.308886	-0.19718	A5_target
AC007326.4	ENSG00000283809	ENST00000638240	2.18712	1.7595	9.98627	11.6759	1.05482	1.81331	-0.313868	0.225514	0.781625	non_target
AC007998.2	ENSG00000267140	ENST00000589258	0.786533	0.509532	1.0466	0.603221	0.322436	0.464055	-0.626336	-0.79495	0.525286	non_target
AC008687.4	ENSG00000268655	ENST00000637680	0.144595	0.104079	1.06892	0.924126	0.0493967	0.0947902	-0.474333	-0.209987	0.940323	A5_target
AC008695.1	ENSG00000273217	ENST00000514667	0.503809	0.556051	0.37244	0.429322	0.0458965	0.176147	0.142339	0.20505	1.94032	non_target
AC009779.4	ENSG00000258311	ENST00000550412	2.51844	3.47321	2.20594	3.57081	2.58106	2.35161	0.46374	0.694855	-0.134316	A5_target
AC010326.1	ENSG00000152454	ENST00000282308	1.03778	1.26055	1.07885	2.2385	0.631503	0.605914	0.280555	1.05305	-0.059677	non_target
AC010522.1	ENSG00000268750	ENST00000593873	4.1194	6.53257	5.42437	11.8474	3.69409	4.05075	0.665219	1.12705	0.132968	non_target
AC011448.1	ENSG00000258674	ENST00000555938	0.455474	1.19431	7.21518	9.48153	0.466799	0.639834	1.39074	0.394084	0.454896	non_target
AC011462.1	ENSG00000255730	ENST00000540732	2.33713	2.20797	2.99651	4.6211	4.34136	4.16545	-0.0820152	0.624953	-0.059677	non_target
AC012184.2	ENSG00000260537	ENST00000443119	1.89961	1.6115	0.977982	0.910549	2.64214	1.96802	-0.237293	-0.103072	-0.424961	A5_target
AC013489.1	ENSG00000173867	ENST00000649547	0.175159	0.16548	0.242787	0.0839601	0.224393	0.0430601	-0.0820151	-1.53192	-2.38161	non_target
AC015802.6	ENSG00000284526	ENST00000640006	0.151909	0.164016	0.112299	0.339805	0.077843	0.186722	0.11063	1.59737	1.26225	non_target
AC020907.6	ENSG00000285526	ENST00000648240	0.160751	0.303735	0.267379	0.308215	0.082374	0.237108	0.917985	0.20505	1.52529	non_target
AC020929.1	ENSG00000160460	ENST00000598249	0.84347	0.763249	3.08204	2.74157	0.79858	0.718825	-0.144184	-0.168882	-0.151795	A5_target
AC021092.2	ENSG00000256294	ENST00000262894	1.20713	1.44236	0.749587	0.678912	0.115466	0.522284	0.256851	-0.142873	2.17736	A5_target
AC022137.3	ENSG00000286261	ENST00000610928	0.534138	0.659096	0.507678	0.292607	0.547419	0.375169	0.303275	-0.79495	-0.545104	non_target
AC022414.1	ENSG00000284762	ENST00000646262	0.231769	0.181993	0.233639	0.403982	0.0431876	0.0828751	-0.348802	0.790013	0.940323	non_target
AC022966.1	ENSG00000055483	ENST00000542802	18.0855	19.5396	35.0561	35.8077	18.5351	17.134	0.111571	0.0306064	-0.113401	A5_target
AC026786.1	ENSG00000256825	ENST00000540096	0.468829	0.224975	0.231054	0.199757	0.0533873	0.102448	-1.0593	-0.209987	0.940323	non_target
AC040160.1	ENSG00000196155	ENST00000360461	3.42992	3.71468	20.3625	15.7022	3.2448	2.03403	0.115062	-0.374946	-0.673786	non_target
AC055839.2	ENSG00000286190	ENST00000568641	3.34337	2.80237	5.26837	4.55474	6.17671	3.63372	-0.254655	-0.209987	-0.765392	A5_target
AC068580.4	ENSG00000250644	ENST00000636397	0.37223	0.210517	0.982752	0.679706	0.708472	0.627474	-0.822256	-0.531915	-0.175154	non_target
AC073111.4	ENSG00000284691	ENST00000498682	0.735985	0.397321	2.99242	2.35189	0.62857	0.30155	-0.88937	-0.347491	-1.05968	non_target
AC090517.4	ENSG00000285253	ENST00000559000	0.0708799	0.168364	0.25151	0.271802	0.0871706	0.0278795	1.24813	0.111941	-1.64464	non_target
AC091230.1	ENSG00000140474	ENST00000568667	25.2702	25.7597	73.1041	59.1874	23.6031	17.2363	0.0276771	-0.30466	-0.45352	non_target
AC092279.1	ENSG00000213096	ENST00000357002	2.72441	3.487	0.8803	0.899433	0.499259	0.514512	0.356041	0.0310208	0.0434165	non_target
AC092587.1	ENSG00000273155	ENST00000410042	0.213975	0.115514	0.237271	0.820524	0.328942	0.210409	-0.88937	1.79001	-0.644639	non_target
AC092647.5	ENSG00000249773	ENST00000426595	0.0413248	0.133855	0.183296	0.633869	0.0423522	0.121908	1.69559	1.79001	1.52529	non_target
AC092718.3	ENSG00000260643	ENST00000564536	1.66452	1.04836	2.30718	1.32977	1.06619	0.750193	-0.666978	-0.79495	-0.507136	non_target
AC093012.1	ENSG00000198001	ENST00000613694	3.06031	3.53894	2.26233	1.79557	1.1483	1.92399	0.20964	-0.33337	0.744599	non_target
AC093155.3	ENSG00000267561	ENST00000370548	0.320005	0.19195	0.157709	0.545386	0.291521	0.244745	-0.737367	1.79001	-0.252322	non_target
AC093323.1	ENSG00000170846	ENST00000635031	17.0099	18.7435	22.7428	24.561	18.7241	19.1356	0.140014	0.110956	0.0313581	non_target
AC093512.2	ENSG00000285043	ENST00000627059	66.4195	64.8281	19.4287	16.4542	125.942	101.236	-0.0349869	-0.239735	-0.315036	non_target
AC093827.5	ENSG00000285458	ENST00000473559	0.279345	0.234585	2.75341	3.92774	0.349911	0.122084	-0.25194	0.512479	-1.51911	non_target
AC097634.4	ENSG00000285708	ENST00000647725	1.01641	1.12294	0.891175	0.72514	0.726758	0.836771	0.143797	-0.29745	0.203357	non_target
AC099489.1	ENSG00000188897	ENST00000598234	1.10167	1.01433	8.88851	4.56147	0.408677	0.279134	-0.119157	-0.962444	-0.550003	A5_target
AC107871.1	ENSG00000260007	ENST00000562767	7.45524	8.59668	6.74468	6.39798	6.73152	6.60413	0.205526	-0.0761315	-0.0275648	A5_target
AC114267.1	ENSG00000186723	ENST00000641419	0.179918	0.264896	1.88624	1.25441	0.0502885	0.0643343	0.558089	-0.588499	0.355361	A5_target
AC114490.3	ENSG00000284773	ENST00000417456	0.294173	0.513076	0.702585	1.73548	0.371061	0.244767	0.802508	1.30459	-0.600245	A5_target
AC118549.1	ENSG00000036549	ENST00000370801	17.4918	18.5484	12.2541	11.2577	4.16421	4.50039	0.084618	-0.122353	0.112008	A5_target
AC118553.2	ENSG00000283761	ENST00000639037	0.248714	0.447562	2.08377	1.69554	0.226576	0.135872	0.847596	-0.29745	-0.737749	non_target
AC132217.2	ENSG00000284779	ENST00000643349	1.90624	1.48729	1.82063	2.34768	1.44027	1.3135	-0.358046	0.366801	-0.132926	A5_target
AC138696.1	ENSG00000264668	ENST00000522452	2.76712	3.36111	9.80787	8.7162	3.69682	3.44985	0.280555	-0.170241	-0.0997544	non_target
AC139530.2	ENSG00000262660	ENST00000571730	5.77214	5.95072	4.45975	4.42686	13.3961	8.89842	0.0439589	-0.0106785	-0.590192	non_target
AC231657.3	ENSG00000288053	ENST00000376358	0.149947	0.161897	0.221696	2.49166	0.358574	0.491492	0.11063	3.49045	0.454896	non_target
AC244197.3	ENSG00000241489	ENST00000651111	0.765837	1.07156	4.95665	5.06438	0.144161	0.122951	0.484605	0.0310208	-0.229602	A5_target
AC245033.1	ENSG00000260836	ENST00000562833	5.76296	6.03022	2.36681	3.27394	9.73436	9.23498	0.0654007	0.468085	-0.0759788	non_target
AC253536.7	ENSG00000285762	ENST00000404092	9.3358	9.79187	14.3945	7.50092	13.3951	15.0381	0.0688097	-0.94038	0.166915	A5_target
ACAA1	ENSG00000060971	ENST00000333167	25.5713	18.285	54.4685	52.8253	26.5525	20.2984	-0.483871	-0.0441925	-0.387482	non_target
ACAA2	ENSG00000167315	ENST00000285093	13.4049	12.5453	9.05967	7.50418	14.741	15.0096	-0.0956185	-0.271763	0.0260529	non_target
ACACA	ENSG00000278540	ENST00000616317	25.8763	26.5494	37.6187	37.8271	19.1279	20.0187	0.0370488	0.00796889	0.0656697	A5_target
ACACB	ENSG00000076555	ENST00000338432	2.53875	2.31176	7.29227	6.62705	1.97492	1.72195	-0.135126	-0.138001	-0.197753	A5_target
ACAD10	ENSG00000111271	ENST00000455480	4.4833	4.25215	12.3603	13.012	3.2794	2.80075	-0.0763686	0.0741307	-0.227622	A5_target
ACAD11	ENSG00000240303	ENST00000264990	14.1997	12.9396	22.1569	16.9046	3.67792	4.26952	-0.134066	-0.390346	0.215183	non_target
ACAD8	ENSG00000151498	ENST00000281182	12.8573	13.2979	13.9042	14.2785	10.8938	12.2362	0.0486082	0.0383256	0.167644	A5_target
ACAD9	ENSG00000177646	ENST00000308982	26.0537	27.6245	42.0694	47.1474	26.0415	28.642	0.0844579	0.164408	0.137325	non_target
ACADL	ENSG00000115361	ENST00000233710	0.853771	0.460908	0.568034	1.09131	0.291666	0.251863	-0.88937	0.942016	-0.21168	non_target
ACADM	ENSG00000117054	ENST00000370834	38.9837	32.7333	11.7662	7.70828	10.7735	14.6467	-0.252114	-0.610167	0.443089	non_target
ACADS	ENSG00000122971	ENST00000242592	6.27576	5.19627	18.102	18.7505	10.062	7.11768	-0.272314	0.050777	-0.499442	non_target
ACADSB	ENSG00000196177	ENST00000358776	8.8489	8.57627	4.50579	3.94239	2.25782	2.46721	-0.0451472	-0.192709	0.12795	A5_target
ACADVL	ENSG00000072778	ENST00000543245	25.5508	22.0004	127.657	95.0215	29.9741	23.134	-0.215842	-0.42595	-0.3737	non_target
ACAN	ENSG00000157766	ENST00000560601	0.215682	0.146623	0.708634	0.306323	0.18011	0.141392	-0.556795	-1.20999	-0.349184	non_target
ACAP2	ENSG00000114331	ENST00000326793	6.84161	7.48493	3.28971	3.09562	1.25135	1.82578	0.129655	-0.0877315	0.545022	non_target
ACAP3	ENSG00000131584	ENST00000354700	7.41597	8.00702	55.3665	49.495	7.29093	6.64293	0.11063	-0.161732	-0.134282	A5_target
ACAT1	ENSG00000075239	ENST00000672354	76.2402	73.7955	31.4826	28.1698	49.8523	62.2795	-0.0470197	-0.160405	0.321098	A5_target
ACAT2	ENSG00000120437	ENST00000367048	91.0691	77.7874	34.0443	27.0854	115.098	103.674	-0.227426	-0.329897	-0.150812	A5_target
ACBD3	ENSG00000182827	ENST00000366812	34.2295	34.4564	24.0936	24.3527	9.76281	12.8627	0.00953022	0.0154328	0.397829	non_target
ACBD4	ENSG00000181513	ENST00000431281	0.388608	0.305149	3.29064	3.92868	0.543095	0.45161	-0.348802	0.255676	-0.266128	non_target
ACBD5	ENSG00000107897	ENST00000375888	6.02258	7.07764	6.81457	6.59848	1.93148	3.18269	0.232886	-0.0464885	0.720542	non_target
ACBD6	ENSG00000230124	ENST00000642319	13.3791	13.6739	22.4011	25.2493	12.2903	11.9025	0.031452	0.172674	-0.0462565	non_target
ACBD7	ENSG00000176244	ENST00000356189	1.61414	1.85745	0.847838	1.05877	1.48014	2.04671	0.202552	0.320527	0.46757	A5_target
ACCS	ENSG00000110455	ENST00000263776	1.11131	0.972878	3.53038	2.99459	0.55408	0.206744	-0.191933	-0.237468	-1.42225	non_target
ACD	ENSG00000102977	ENST00000620338	17.469	17.1773	30.7475	30.1713	24.8658	22.4949	-0.0242997	-0.027295	-0.144566	A5_target
ACE	ENSG00000159640	ENST00000290866	0.663528	0.482799	1.56751	0.995642	0.709592	0.638286	-0.458736	-0.654772	-0.152786	non_target
ACE2	ENSG00000130234	ENST00000427411	0.448999	0.749211	0.814717	0.782622	0.104582	0.160551	0.738661	-0.0579842	0.618395	non_target
ACER2	ENSG00000177076	ENST00000340967	0.671092	1.22621	1.37383	2.87036	0.185171	0.558384	0.869622	1.06303	1.5924	A5_target
ACER3	ENSG00000078124	ENST00000532485	3.94328	4.4051	1.55855	1.57201	1.38045	2.03476	0.159778	0.0124051	0.559719	A5_target
ACHE	ENSG00000087085	ENST00000302913	1.35594	1.28101	6.49757	6.77807	1.41447	1.16668	-0.0820152	0.060974	-0.277857	non_target
ACIN1	ENSG00000100813	ENST00000262710	79.5514	81.8671	174.431	181.531	51.4742	61.083	0.0413974	0.0575626	0.246922	non_target
ACLY	ENSG00000131473	ENST00000590151	206.468	150.415	251.455	190.705	202.818	137.105	-0.45697	-0.398953	-0.564904	non_target
ACO1	ENSG00000122729	ENST00000309951	11.1165	10.8915	13.1159	11.3208	10.1708	11.9525	-0.0294968	-0.212335	0.232877	A5_target
ACO2	ENSG00000100412	ENST00000396512	36.2074	24.4675	49.4668	38.4701	49.0854	29.044	-0.565414	-0.362723	-0.757052	non_target
ACOT1	ENSG00000184227	ENST00000311148	2.03771	2.29178	1.78882	0.325582	3.78518	2.83865	0.169524	-2.45791	-0.415158	non_target
ACOT11	ENSG00000162390	ENST00000371316	0.483232	0.242672	1.61999	1.16354	0.529799	0.298368	-0.993707	-0.477468	-0.828351	A5_target
ACOT13	ENSG00000112304	ENST00000230048	8.89146	7.85985	4.47802	3.87145	8.54981	8.74329	-0.177919	-0.209987	0.0322833	non_target
ACOT2	ENSG00000119673	ENST00000238651	8.87621	7.88472	13.6901	5.56976	13.5627	9.20437	-0.170884	-1.29745	-0.559248	non_target
ACOT7	ENSG00000097021	ENST00000377855	51.7962	51.3757	55.8618	66.8308	97.6237	75.7454	-0.0117603	0.258651	-0.366073	non_target
ACOT8	ENSG00000101473	ENST00000217455	10.5439	10.3798	13.0674	14.2703	17.8618	15.0644	-0.0226366	0.127048	-0.245736	non_target
ACOT9	ENSG00000123130	ENST00000379303	6.61376	6.81873	7.57277	8.70814	5.99676	6.56874	0.0440322	0.201544	0.131435	non_target
ACOX1	ENSG00000161533	ENST00000293217	4.36275	4.10845	3.5578	4.5763	2.38599	3.30891	-0.0866436	0.363198	0.47177	A5_target
ACOX3	ENSG00000087008	ENST00000356406	3.7133	3.71326	6.90869	8.31424	4.75065	4.63167	-1.41422e-05	0.267172	-0.0365934	A5_target
ACOXL	ENSG00000153093	ENST00000439055	0.0603241	0.0976978	0.133783	0.346985	0.216384	0.444891	0.695592	1.37498	1.03986	non_target
ACP1	ENSG00000143727	ENST00000272067	76.7397	84.1006	20.4554	19.4531	51.6125	90.6527	0.132144	-0.0724838	0.812629	A5_target
ACP2	ENSG00000134575	ENST00000672636	23.9034	23.2825	30.8294	36.1447	28.8413	25.3054	-0.0379666	0.229474	-0.188688	non_target
ACP6	ENSG00000162836	ENST00000583509	2.85022	3.23292	4.92906	5.12946	3.58545	3.1265	0.181763	0.057493	-0.197605	A5_target
ACR	ENSG00000100312	ENST00000216139	0.100104	0.162124	0.444011	0.191934	0.307779	0.049218	0.695592	-1.20999	-2.64464	non_target
ACSF2	ENSG00000167107	ENST00000427954	4.00639	5.14964	14.8791	14.1439	6.06124	4.94016	0.362169	-0.0731055	-0.295055	A5_target
ACSF3	ENSG00000176715	ENST00000614302	5.41834	5.22742	14.4198	16.9572	8.47289	6.25615	-0.0517523	0.233847	-0.437579	non_target
ACSL1	ENSG00000151726	ENST00000515030	10.1524	10.4331	7.39794	8.13385	6.7074	8.32529	0.0393386	0.136815	0.311747	non_target
ACSL3	ENSG00000123983	ENST00000357430	23.409	22.434	13.975	11.959	6.24766	6.5624	-0.0613728	-0.224754	0.0709071	A5_target
ACSL4	ENSG00000068366	ENST00000340800	17.3937	16.0702	6.22078	5.60974	3.70003	4.11759	-0.114176	-0.149162	0.154263	non_target
ACSL6	ENSG00000164398	ENST00000651883	0.898104	0.934206	0.971593	0.923985	0.460217	0.549268	0.0568587	-0.0724838	0.255196	non_target
ACSM3	ENSG00000005187	ENST00000289416	1.38458	1.09832	0.250666	0.650135	0.550228	0.722434	-0.334155	1.37498	0.392835	non_target
ACSS1	ENSG00000154930	ENST00000323482	13.4202	12.9578	19.1862	17.6075	17.7326	15.1731	-0.0505826	-0.123878	-0.224886	non_target
ACSS2	ENSG00000131069	ENST00000253382	8.95599	7.84679	14.4896	10.8848	13.0909	9.40829	-0.190751	-0.412702	-0.476558	non_target
ACSS3	ENSG00000111058	ENST00000548058	0.221778	0.165775	0.264841	0.163548	0.078678	0.134204	-0.419885	-0.695414	0.770398	non_target
ACTA1	ENSG00000143632	ENST00000366684	0.528048	1.14027	2.98092	4.78612	0.0983958	0.330431	1.11063	0.683098	1.74768	non_target
ACTB	ENSG00000075624	ENST00000646664	1456.38	1314.3	720.698	788.255	2194.11	1776.32	-0.148091	0.129267	-0.304739	non_target
ACTG1	ENSG00000184009	ENST00000575842	1123.81	1115.89	1052.53	1174.39	1921.12	1635.78	-0.0102063	0.158048	-0.231969	non_target
ACTL6A	ENSG00000136518	ENST00000429709	34.0886	34.3879	17.209	17.1726	31.0588	33.9761	0.0126106	-0.00305797	0.129518	non_target
ACTL6B	ENSG00000077080	ENST00000160382	0.0469649	0.101416	0.208312	1.08057	0.144398	0.230911	1.11063	2.37498	0.677289	non_target
ACTL8	ENSG00000117148	ENST00000375406	0.933073	0.839532	0.948438	1.04359	1.91255	0.649913	-0.152404	0.137936	-1.55718	non_target
ACTN1	ENSG00000072110	ENST00000538545	44.8581	45.4113	66.2473	56.5908	45.6605	47.5383	0.0176842	-0.227295	0.0581434	non_target
ACTN2	ENSG00000077522	ENST00000366578	3.37893	3.91788	10.0349	10.422	1.08405	0.664523	0.213507	0.0546076	-0.70604	A5_target
ACTN4	ENSG00000130402	ENST00000252699	81.4859	88.3055	151.799	168.859	69.4438	81.0871	0.115953	0.153657	0.223625	non_target
ACTR10	ENSG00000131966	ENST00000254286	13.0487	12.0668	6.32827	6.04098	8.62093	12.4512	-0.112858	-0.0670293	0.530374	non_target
ACTR1A	ENSG00000138107	ENST00000369905	61.205	65.5915	46.4984	54.0202	102.799	95.9728	0.099859	0.216318	-0.0991346	A5_target
ACTR1B	ENSG00000115073	ENST00000289228	18.5431	17.216	38.4592	33.0006	21.9996	19.4156	-0.107138	-0.220835	-0.180256	non_target
ACTR2	ENSG00000138071	ENST00000377982	120.25	124.97	26.8991	21.8755	37.4283	53.8413	0.0555424	-0.298243	0.524583	non_target
ACTR3	ENSG00000115091	ENST00000263238	27.5587	25.7792	10.8408	7.7895	11.4111	16.9305	-0.0963022	-0.476874	0.569182	non_target
ACTR3B	ENSG00000133627	ENST00000256001	18.6294	17.2507	14.6325	16.2472	14.0874	17.8101	-0.110928	0.15101	0.338287	non_target
ACTR3C	ENSG00000106526	ENST00000252071	0.646403	0.634474	1.56388	1.35205	0.60225	0.7512	-0.0268736	-0.209987	0.318835	non_target
ACTR5	ENSG00000101442	ENST00000243903	11.0439	11.0745	13.5862	13.1468	13.9681	13.4574	0.00399707	-0.0474343	-0.0537399	non_target
ACTR6	ENSG00000075089	ENST00000188312	15.1341	16.9361	1.15958	1.67085	5.59682	6.88392	0.162306	0.526978	0.298624	non_target
ACTR8	ENSG00000113812	ENST00000335754	16.2587	16.1727	10.1565	13.5737	10.5553	12.3694	-0.00765971	0.418414	0.228811	non_target
ACTRT3	ENSG00000184378	ENST00000330368	0.685333	0.97119	0.379974	0.164252	0.614576	0.968749	0.502947	-1.20999	0.65653	non_target
ACVR1	ENSG00000115170	ENST00000434821	3.84509	3.87322	3.43003	4.03626	3.03807	3.16844	0.0105184	0.234798	0.0606173	non_target
ACVR1B	ENSG00000135503	ENST00000541224	9.47133	10.3556	12.2308	15.1715	9.09247	10.7675	0.128777	0.310845	0.243939	non_target
ACVR1C	ENSG00000123612	ENST00000243349	0.161695	0.0872913	0.0358599	0.0620051	0.00828579	0.0159001	-0.88937	0.790013	0.940323	non_target
ACVR2A	ENSG00000121989	ENST00000241416	3.69266	4.32786	2.7095	2.68464	1.25211	1.59283	0.228992	-0.0132954	0.347233	A5_target
ACVR2B	ENSG00000114739	ENST00000352511	8.08569	8.56614	6.53421	6.75564	2.88261	3.36317	0.0832742	0.0480809	0.222446	A5_target
ACVRL1	ENSG00000139567	ENST00000550683	0.29526	0.30004	0.423702	0.266407	0.213601	0.341576	0.0231671	-0.669419	0.677289	non_target
ACY1	ENSG00000243989	ENST00000404366	1.21477	0.682027	1.93972	2.79496	2.14136	1.62456	-0.832787	0.526978	-0.398479	A5_target
ACYP1	ENSG00000119640	ENST00000555463	6.98509	5.68084	3.21894	4.17438	4.46261	4.37098	-0.298176	0.374975	-0.0299296	A5_target
ACYP2	ENSG00000170634	ENST00000607452	0.567151	0.551118	0.754679	1.30491	0.930004	1.33848	-0.0413732	0.790013	0.525286	non_target
ADA	ENSG00000196839	ENST00000372874	17.1281	15.0322	24.1921	19.4474	29.5182	23.7585	-0.188311	-0.314957	-0.313157	non_target
ADAL	ENSG00000168803	ENST00000562188	4.80535	5.59795	1.47236	2.06092	2.68922	2.79786	0.220254	0.485158	0.0571367	non_target
ADAM10	ENSG00000137845	ENST00000260408	5.64488	5.37448	3.69877	3.14855	1.08473	1.44447	-0.070817	-0.232355	0.413205	A5_target
ADAM11	ENSG00000073670	ENST00000200557	6.2205	5.91233	18.7151	10.8263	8.82348	5.49142	-0.0733041	-0.789655	-0.684168	A5_target
ADAM15	ENSG00000143537	ENST00000356955	31.1879	31.1841	59.9088	51.9334	55.768	44.081	-0.000176864	-0.206104	-0.339279	non_target
ADAM17	ENSG00000151694	ENST00000310823	8.70435	8.18372	6.32623	9.06342	2.52254	4.48802	-0.0889791	0.518711	0.831201	A5_target
ADAM19	ENSG00000135074	ENST00000517905	1.05892	1.46998	2.97147	1.40879	1.90473	1.27503	0.4732	-1.07672	-0.579051	non_target
ADAM21	ENSG00000139985	ENST00000603540	0.0540797	0.145975	0.0599675	0.207378	0.0831365	0.132946	1.43256	1.79001	0.677289	non_target
ADAM22	ENSG00000008277	ENST00000265727	2.7481	2.69982	5.87497	6.17096	0.710451	0.876424	-0.0255745	0.0709136	0.302893	A5_target
ADAM23	ENSG00000114948	ENST00000264377	3.08491	2.74515	3.55861	3.11991	1.60976	1.93344	-0.168346	-0.189809	0.264325	A5_target
ADAM8	ENSG00000151651	ENST00000445355	0.658863	0.758799	4.48099	2.69497	0.382639	0.259153	0.203739	-0.733549	-0.562177	non_target
ADAM9	ENSG00000168615	ENST00000487273	33.89	30.2764	19.4943	14.8179	6.74315	7.514	-0.162666	-0.395711	0.156158	A5_target
ADAMTS1	ENSG00000154734	ENST00000284984	63.5374	67.9005	125.627	125.133	23.6352	32.4954	0.0958168	-0.00569514	0.459295	A5_target
ADAMTS10	ENSG00000142303	ENST00000597188	0.673484	1.18164	7.16936	4.00302	0.707485	0.579478	0.81107	-0.840753	-0.287946	A5_target
ADAMTS12	ENSG00000151388	ENST00000504830	0.242144	0.126214	0.833298	0.160094	0.0941315	0.114949	-0.939996	-2.37991	0.288246	non_target
ADAMTS13	ENSG00000160323	ENST00000371929	1.42163	1.97348	12.9329	9.84604	0.416278	0.342351	0.4732	-0.393433	-0.282069	A5_target
ADAMTS14	ENSG00000138316	ENST00000373208	0.0679204	0.0586669	0.783277	0.208362	0.0278436	0.0267154	-0.211298	-1.91043	-0.059677	non_target
ADAMTS15	ENSG00000166106	ENST00000299164	1.65279	1.26687	2.77008	3.67696	1.60337	1.46396	-0.383634	0.408584	-0.13123	A5_target
ADAMTS17	ENSG00000140470	ENST00000268070	1.1309	0.879141	2.95949	2.03822	0.950393	0.556025	-0.363301	-0.538041	-0.773373	A5_target
ADAMTS19	ENSG00000145808	ENST00000274487	0.949556	0.728066	2.31951	1.42483	0.169246	0.17592	-0.383185	-0.703027	0.0558003	non_target
ADAMTS2	ENSG00000087116	ENST00000251582	2.28979	2.31279	7.95659	5.17936	2.71441	2.15825	0.0144146	-0.619378	-0.330781	non_target
ADAMTS20	ENSG00000173157	ENST00000389420	0.394009	0.206628	1.79755	1.55407	0.0576865	0.0442791	-0.93119	-0.209987	-0.381605	non_target
ADAMTS4	ENSG00000158859	ENST00000367996	0.0512449	0.142275	0.633183	0.505306	0.0600218	0.0503909	1.4732	-0.325464	-0.252322	non_target
ADAMTS5	ENSG00000154736	ENST00000284987	0.141349	0.160646	0.329974	0.228222	0.0457462	0.0731543	0.184631	-0.531915	0.677289	non_target
ADAMTS6	ENSG00000049192	ENST00000381055	0.107719	0.105731	0.564658	0.337965	0.0401445	0.00962946	-0.0268736	-0.740502	-2.05968	non_target
ADAMTS7	ENSG00000136378	ENST00000388820	1.17994	0.895988	7.2178	4.72359	0.916926	0.446261	-0.397165	-0.611675	-1.03892	A5_target
ADAMTS8	ENSG00000134917	ENST00000257359	0.256469	0.127804	1.13756	0.605216	0.525691	0.387992	-1.00485	-0.910427	-0.438189	A5_target
ADAMTS9	ENSG00000163638	ENST00000498707	0.553895	0.648722	2.41516	1.80001	0.279023	0.323106	0.227987	-0.424112	0.211625	non_target
ADAMTSL3	ENSG00000156218	ENST00000286744	0.107867	0.127051	0.456695	0.338428	0.0301496	0.028928	0.236161	-0.43238	-0.059677	non_target
ADAMTSL4	ENSG00000143382	ENST00000369039	0.480588	0.429427	1.94788	0.571935	0.322697	0.146662	-0.162389	-1.76798	-1.13768	A5_target
ADAMTSL5	ENSG00000185761	ENST00000330475	2.02745	2.10263	5.62048	6.03558	1.36702	1.54772	0.052527	0.1028	0.17911	A5_target
ADAP1	ENSG00000105963	ENST00000539900	4.2064	4.0449	13.3372	6.80493	8.58829	6.43065	-0.0564801	-0.9708	-0.417406	A5_target
ADAP2	ENSG00000184060	ENST00000580525	2.55303	1.59587	4.17198	4.29389	3.02964	2.33431	-0.677866	0.0415515	-0.376151	non_target
ADAR	ENSG00000160710	ENST00000368474	68.0012	69.9369	62.5811	65.0246	60.6364	63.9185	0.0404933	0.0552599	0.0760492	A5_target
ADARB1	ENSG00000197381	ENST00000360697	5.83087	7.0211	14.8783	11.7616	3.29893	3.57024	0.267986	-0.339125	0.114021	A5_target
ADAT1	ENSG00000065457	ENST00000307921	6.85491	6.16082	11.2957	10.867	4.3565	6.40176	-0.154017	-0.0558163	0.555298	A5_target
ADAT2	ENSG00000189007	ENST00000237283	5.78878	7.166	8.97391	9.67047	1.40975	1.8035	0.30791	0.107848	0.355361	A5_target
ADAT3	ENSG00000213638	ENST00000329478	7.83336	7.73273	27.6966	29.1802	11.3311	8.40707	-0.0186531	0.0752823	-0.430615	non_target
ADCK1	ENSG00000063761	ENST00000238561	5.12498	4.58755	4.46865	4.1153	6.57673	6.33177	-0.159822	-0.118839	-0.0547615	non_target
ADCK2	ENSG00000133597	ENST00000072869	16.7118	15.3117	18.1305	17.8072	30.0655	25.8394	-0.126238	-0.0259553	-0.218534	non_target
ADCK5	ENSG00000173137	ENST00000308860	2.15454	2.12911	18.141	12.3229	1.64672	1.22091	-0.0171256	-0.557911	-0.431646	non_target
ADCY1	ENSG00000164742	ENST00000297323	3.05366	3.13829	4.53992	4.18518	2.95572	2.50787	0.0394389	-0.117376	-0.237047	A5_target
ADCY3	ENSG00000138031	ENST00000405392	16.7501	18.4014	26.4256	28.5888	19.8692	17.0952	0.135648	0.113517	-0.216939	A5_target
ADCY5	ENSG00000173175	ENST00000462833	0.372019	0.45452	1.28099	0.563122	0.461536	0.567983	0.288967	-1.18574	0.299404	A5_target
ADCY6	ENSG00000174233	ENST00000307885	7.39662	8.4763	15.9127	13.46	7.22874	6.6745	0.196567	-0.241498	-0.115083	A5_target
ADCY7	ENSG00000121281	ENST00000673801	1.55225	1.41717	3.03749	2.23214	1.13464	1.11111	-0.131343	-0.444453	-0.0302332	A5_target
ADCY9	ENSG00000162104	ENST00000294016	7.4355	9.15145	12.0343	12.4163	7.87775	8.2553	0.299572	0.0450764	0.0675364	A5_target
ADD1	ENSG00000087274	ENST00000264758	41.5291	45.3357	46.8942	47.7007	52.6989	57.5755	0.126524	0.0245987	0.127684	non_target
ADD2	ENSG00000075340	ENST00000264436	6.94943	6.42189	7.99651	7.85875	6.9564	6.84119	-0.113897	-0.0250696	-0.024093	A5_target
ADD3	ENSG00000148700	ENST00000356080	13.1536	8.35306	10.2514	5.09997	2.47672	2.02549	-0.655083	-1.00725	-0.290161	A5_target
ADGRA2	ENSG00000020181	ENST00000412232	4.7414	5.2417	12.4811	9.20945	5.81002	4.54076	0.144723	-0.438558	-0.35561	non_target
ADGRA3	ENSG00000152990	ENST00000334304	13.2453	11.515	11.4793	11.3936	6.61902	8.67277	-0.20196	-0.0108191	0.389876	A5_target
ADGRB1	ENSG00000181790	ENST00000517894	1.89229	2.14217	15.1587	8.61965	1.89233	1.37583	0.178936	-0.814446	-0.459857	A5_target
ADGRB2	ENSG00000121753	ENST00000373658	4.40235	4.22508	19.8198	15.5635	6.19188	4.60198	-0.0592951	-0.348772	-0.428122	non_target
ADGRB3	ENSG00000135298	ENST00000370598	0.599392	0.532958	3.15383	3.24491	0.228855	0.277366	-0.169478	0.0410745	0.277358	non_target
ADGRD1	ENSG00000111452	ENST00000535015	0.0257833	0.0835147	0.114362	0.692096	0.0792732	0.0507073	1.69559	2.59737	-0.644639	non_target
ADGRE2	ENSG00000127507	ENST00000601345	0.457637	0.123528	0.913431	0.877447	0.140705	0.225005	-1.88937	-0.0579842	0.677289	non_target
ADGRE5	ENSG00000123146	ENST00000242786	6.23753	6.63775	13.7835	12.3897	8.04825	7.28087	0.0897209	-0.153804	-0.144566	A5_target
ADGRG1	ENSG00000205336	ENST00000568909	0.134602	0.199828	0.0373141	0.0645194	0.103461	0.0827241	0.570062	0.790013	-0.322711	non_target
ADGRG2	ENSG00000173698	ENST00000379869	0.305613	0.197982	0.440551	0.175789	0.109624	0.180312	-0.626336	-1.32546	0.717931	non_target
ADGRG6	ENSG00000112414	ENST00000367609	0.43016	0.532411	0.465359	0.16093	0.139784	0.144436	0.307667	-1.53192	0.0472382	non_target
ADGRL1	ENSG00000072071	ENST00000340736	24.8729	25.9302	59.0629	50.6781	25.6875	22.7645	0.0600605	-0.220891	-0.17428	A5_target
ADGRL2	ENSG00000117114	ENST00000370725	18.7692	15.739	17.8737	16.386	4.57337	5.49171	-0.25402	-0.125375	0.263999	A5_target
ADGRL3	ENSG00000150471	ENST00000506720	0.533707	0.264761	0.703779	0.387194	0.0739159	0.141841	-1.01136	-0.862064	0.940323	non_target
ADGRV1	ENSG00000164199	ENST00000405460	0.622164	0.889081	2.68656	3.32609	0.157533	0.230323	0.51502	0.308069	0.548006	A5_target
ADH5	ENSG00000197894	ENST00000296412	62.7725	61.3405	26.5577	25.9229	62.0427	70.0561	-0.0332928	-0.0349006	0.175249	non_target
ADI1	ENSG00000182551	ENST00000327435	92.7088	83.586	29.7672	38.3824	133.961	129.662	-0.149446	0.366721	-0.0470549	non_target
ADIPOR1	ENSG00000159346	ENST00000340990	79.995	85.9641	41.2208	42.5284	105.699	122.217	0.103823	0.0450543	0.209489	non_target
ADIPOR2	ENSG00000006831	ENST00000357103	46.4126	52.5442	21.3857	20.7352	45.3683	56.9824	0.179017	-0.0445637	0.328831	A5_target
ADK	ENSG00000156110	ENST00000539909	15.9534	16.2938	6.77329	7.99146	13.8091	15.4402	0.0304596	0.238603	0.161066	A5_target
ADM	ENSG00000148926	ENST00000528655	5.45618	8.10018	18.3187	27.3158	5.20352	8.30869	0.570062	0.576417	0.675134	non_target
ADM2	ENSG00000128165	ENST00000395738	0.937365	0.759054	1.74474	1.28375	1.4067	1.13572	-0.304408	-0.442648	-0.308705	A5_target
ADM5	ENSG00000224420	ENST00000420022	1.49981	1.52939	10.3482	7.3489	1.70789	1.55675	0.0281678	-0.49378	-0.133678	non_target
ADNP	ENSG00000101126	ENST00000673732	26.0997	29.7415	24.6563	25.0003	11.1397	14.6792	0.188444	0.0199888	0.398061	A5_target
ADNP2	ENSG00000101544	ENST00000262198	15.6556	17.5028	15.4825	16.8181	7.39657	11.5051	0.160903	0.119379	0.637344	A5_target
ADO	ENSG00000181915	ENST00000373783	16.9989	16.6068	10.9763	12.4823	12.0371	15.7423	-0.033675	0.185497	0.387158	A5_target
ADORA1	ENSG00000163485	ENST00000367236	1.70165	1.51972	1.77044	2.09454	3.38027	2.0658	-0.163131	0.242525	-0.710442	A5_target
ADORA2B	ENSG00000170425	ENST00000304222	9.85954	9.75452	10.2468	7.75147	14.6285	12.8594	-0.0154498	-0.402632	-0.185966	A5_target
ADPGK	ENSG00000159322	ENST00000311669	37.5367	38.1408	29.5492	29.1962	34.1095	34.4614	0.0230326	-0.0173422	0.0148089	A5_target
ADPRHL1	ENSG00000153531	ENST00000612156	0.22736	0.213806	0.357839	0.478114	0.187914	0.230783	-0.0886789	0.418044	0.296467	non_target
ADPRHL2	ENSG00000116863	ENST00000373178	24.1905	24.7611	19.6134	21.6115	44.7411	37.6421	0.0336325	0.139955	-0.249255	A5_target
ADPRM	ENSG00000170222	ENST00000379774	3.07948	2.72038	0.827818	2.32598	1.86493	2.2023	-0.178877	1.49045	0.239883	non_target
ADRA1B	ENSG00000170214	ENST00000306675	0.142749	0.0924758	0.379898	0.218959	0.146299	0.0561481	-0.626336	-0.79495	-1.38161	non_target
ADRA2C	ENSG00000184160	ENST00000330055	7.35126	8.0093	22.6022	19.3484	9.79424	8.57592	0.123686	-0.224248	-0.191642	non_target
ADRB1	ENSG00000043591	ENST00000369295	0.23552	0.305149	1.04465	0.270943	0.241376	0.162116	0.373664	-1.94695	-0.57425	A5_target
ADRB2	ENSG00000169252	ENST00000305988	0.457345	0.650912	0.968172	0.876886	0.426106	0.674585	0.509179	-0.142873	0.662789	A5_target
ADRM1	ENSG00000130706	ENST00000491935	133.933	129.253	188.095	203.248	234.35	201.025	-0.0513176	0.111782	-0.221288	non_target
ADSL	ENSG00000239900	ENST00000216194	83.2827	78.9963	63.6896	73.8685	138.15	118.65	-0.0762319	0.213901	-0.21953	non_target
ADSS1	ENSG00000185100	ENST00000332972	1.27227	0.824204	1.53172	2.78787	2.68232	1.96597	-0.626336	0.864013	-0.448242	non_target
ADSS2	ENSG00000035687	ENST00000366535	50.9566	45.8834	16.7742	14.5021	15.1589	25.1501	-0.151295	-0.209987	0.7304	A5_target
AEBP2	ENSG00000139154	ENST00000398864	8.14144	8.50235	8.06278	7.05138	2.02842	2.66399	0.0625778	-0.193373	0.393229	A5_target
AEN	ENSG00000181026	ENST00000332810	25.0231	26.4389	28.0575	28.1434	37.5605	36.0844	0.0793986	0.00441235	-0.0578438	A5_target
AFAP1	ENSG00000196526	ENST00000420658	5.3257	5.03388	8.88894	5.08793	3.96611	4.38527	-0.0813022	-0.804934	0.144941	A5_target
AFAP1L1	ENSG00000157510	ENST00000296721	2.00798	2.33479	2.08167	1.64023	2.41104	2.0563	0.217545	-0.343843	-0.229602	A5_target
AFAP1L2	ENSG00000169129	ENST00000304129	0.634594	0.394492	0.767655	1.2536	0.650372	0.359283	-0.685837	0.707551	-0.856144	non_target
AFDN	ENSG00000130396	ENST00000400822	28.8259	34.9195	61.0853	63.2575	8.72366	11.6886	0.276671	0.0504115	0.422093	non_target
AFF1	ENSG00000172493	ENST00000395146	6.94546	7.57392	8.54788	9.01583	1.97507	2.30437	0.124969	0.0768939	0.222466	A5_target
AFF3	ENSG00000144218	ENST00000409579	0.906632	0.907698	3.87513	2.21241	0.557505	0.599752	0.00169555	-0.808625	0.105382	A5_target
AFF4	ENSG00000072364	ENST00000265343	11.814	13.4849	11.9017	14.8227	2.89232	4.2291	0.19085	0.316642	0.548126	A5_target
AFG1L	ENSG00000135537	ENST00000368977	1.17684	1.02569	0.880458	1.19616	0.479533	0.515872	-0.19832	0.442089	0.105382	A5_target
AFG3L2	ENSG00000141385	ENST00000269143	42.0613	40.2046	32.1487	30.2259	38.4877	43.8549	-0.0651336	-0.0889719	0.188342	non_target
AFMID	ENSG00000183077	ENST00000327898	11.3677	12.1373	13.1656	11.463	13.2469	12.8343	0.0945103	-0.199792	-0.0456474	A5_target
AFTPH	ENSG00000119844	ENST00000238855	5.81227	6.82039	4.82416	5.87235	1.83697	2.25879	0.230751	0.28366	0.298217	A5_target
AGA	ENSG00000038002	ENST00000264595	5.51654	4.89395	3.35079	3.50324	3.52906	4.2844	-0.172764	0.0641877	0.279809	non_target
AGAP1	ENSG00000157985	ENST00000409538	5.35235	5.5523	10.0082	9.56918	5.60493	6.13461	0.0529144	-0.06471	0.130274	A5_target
AGAP2	ENSG00000135439	ENST00000547588	1.89985	1.46828	6.12051	4.60126	1.9061	1.00292	-0.371763	-0.411621	-0.92641	A5_target
AGAP3	ENSG00000133612	ENST00000397238	40.212	46.0046	78.413	74.39	59.3719	48.7475	0.194153	-0.0759834	-0.284452	A5_target
AGAP4	ENSG00000188234	ENST00000616763	6.6844	8.27196	13.798	11.7318	0.895847	0.935389	0.307431	-0.234033	0.0623136	A5_target
AGAP5	ENSG00000172650	ENST00000581191	2.88461	3.67068	6.51158	8.88877	0.527917	0.506525	0.347669	0.448976	-0.059677	A5_target
AGAP6	ENSG00000204149	ENST00000412531	17.0167	23.3224	31.0382	38.3532	2.77614	3.31248	0.454763	0.305302	0.254834	A5_target
AGAP9	ENSG00000204172	ENST00000452145	20.0301	25.3172	62.8419	62.206	2.3048	2.24089	0.33795	-0.014673	-0.0405681	A5_target
AGBL3	ENSG00000146856	ENST00000436302	0.141812	0.284355	0.898579	0.932235	0.145338	0.0996061	1.00371	0.0530471	-0.545104	non_target
AGBL5	ENSG00000084693	ENST00000360131	21.0592	21.8892	15.6842	15.2385	31.1778	29.782	0.055768	-0.0415897	-0.0660795	non_target
AGER	ENSG00000204305	ENST00000375069	0.558449	0.351725	6.19249	5.88905	0.286167	0.228809	-0.666978	-0.0724838	-0.322711	non_target
AGFG1	ENSG00000173744	ENST00000409979	23.1272	25.7843	19.0724	19.9707	15.8717	19.3727	0.156901	0.0663967	0.287562	non_target
AGFG2	ENSG00000106351	ENST00000300176	2.92595	3.65628	5.23733	6.83458	4.58178	4.10402	0.321468	0.38402	-0.15887	non_target
AGGF1	ENSG00000164252	ENST00000312916	13.1831	12.5126	7.10591	6.11282	2.92436	3.68367	-0.075302	-0.217183	0.333024	non_target
AGK	ENSG00000006530	ENST00000649286	42.4357	43.709	31.6768	30.6391	29.3982	38.4888	0.0426531	-0.0480551	0.388708	A5_target
AGL	ENSG00000162688	ENST00000294724	11.2947	12.5373	5.37214	5.27109	1.91119	1.89991	0.15059	-0.0273959	-0.00853812	non_target
AGMAT	ENSG00000116771	ENST00000375826	0.763153	0.47441	0.410298	0.709442	0.545119	0.52303	-0.685837	0.790013	-0.059677	non_target
AGO1	ENSG00000092847	ENST00000373204	10.3196	10.0544	10.7081	11.1692	5.84714	5.50242	-0.0375673	0.0608245	-0.0876655	A5_target
AGO2	ENSG00000123908	ENST00000220592	12.0296	15.0057	15.0414	16.2667	5.59894	7.81697	0.318922	0.112984	0.481458	A5_target
AGO3	ENSG00000126070	ENST00000373191	2.40645	2.83015	2.62404	3.14114	0.805925	1.20286	0.233977	0.259498	0.577753	non_target
AGO4	ENSG00000134698	ENST00000373210	3.49408	4.1445	3.36153	3.66105	1.29116	1.82923	0.246285	0.123139	0.502565	A5_target
AGPAT1	ENSG00000204310	ENST00000395499	39.4577	43.2527	21.686	24.8514	50.3428	50.5868	0.132481	0.196564	0.00697777	non_target
AGPAT2	ENSG00000169692	ENST00000371696	55.6485	53.4854	63.1445	59.4734	109.746	88.182	-0.0571962	-0.0864126	-0.315618	non_target
AGPAT3	ENSG00000160216	ENST00000291572	7.78434	8.91092	8.72856	8.44509	8.13431	9.65939	0.194999	-0.0476308	0.247912	A5_target
AGPAT4	ENSG00000026652	ENST00000320285	5.79064	5.53038	13.2829	8.83361	2.67567	2.72715	-0.0663457	-0.588499	0.0274922	A5_target
AGPAT5	ENSG00000155189	ENST00000285518	10.7013	11.4952	3.91	3.72103	3.33364	5.44292	0.103241	-0.0714674	0.707283	A5_target
AGPS	ENSG00000018510	ENST00000264167	15.3554	14.3667	7.45006	6.88944	4.01822	5.1712	-0.0960239	-0.112865	0.363943	A5_target
AGRN	ENSG00000188157	ENST00000379370	10.7665	9.56757	49.6179	31.4702	12.6763	8.53112	-0.17032	-0.656874	-0.571323	A5_target
AGTPBP1	ENSG00000135049	ENST00000337006	13.7292	14.2188	8.304	8.89727	2.90268	3.99664	0.0505447	0.0995571	0.461402	A5_target
AGTR1	ENSG00000144891	ENST00000418473	0.96769	0.597037	0.306584	0.795168	0.672973	0.441797	-0.696725	1.37498	-0.607165	non_target
AGTRAP	ENSG00000177674	ENST00000314340	28.1231	30.3645	33.4325	25.9892	61.929	47.3987	0.11063	-0.363338	-0.38577	A5_target
AHCTF1	ENSG00000153207	ENST00000366508	15.5565	17.8472	12.8968	12.8592	2.49795	2.59779	0.198182	-0.00421293	0.0565449	A5_target
AHCY	ENSG00000101444	ENST00000217426	180.035	187.087	182.876	192.764	305.46	273.834	0.0554329	0.0759674	-0.157683	non_target
AHCYL1	ENSG00000168710	ENST00000369799	45.4352	42.4319	35.8289	33.5512	37.1514	38.4306	-0.0986613	-0.0947595	0.048837	A5_target
AHCYL2	ENSG00000158467	ENST00000325006	4.62913	4.92164	4.26975	4.0171	2.68404	2.49176	0.0884	-0.0879968	-0.107243	A5_target
AHDC1	ENSG00000126705	ENST00000374011	4.42477	4.35729	15.0647	12.8749	3.86254	3.79348	-0.022169	-0.226611	-0.0260266	A5_target
AHI1	ENSG00000135541	ENST00000265602	3.16377	3.08453	4.31983	3.98366	0.617031	0.592028	-0.036596	-0.116878	-0.059677	A5_target
AHNAK	ENSG00000124942	ENST00000378024	4.61242	6.3311	36.8809	30.7367	0.785895	0.739044	0.456933	-0.262908	-0.0886768	A5_target
AHNAK2	ENSG00000185567	ENST00000333244	0.585556	0.754455	6.09483	5.26926	0.116022	0.138192	0.365627	-0.209987	0.252267	A5_target
AHR	ENSG00000106546	ENST00000242057	1.36431	1.62158	1.88152	1.58269	0.375994	0.586232	0.249235	-0.249516	0.640763	A5_target
AHRR	ENSG00000063438	ENST00000506456	0.487316	0.624809	1.35093	1.75191	0.405789	0.329446	0.358557	0.374975	-0.300685	A5_target
AHRR	ENSG00000286169	ENST00000316418	3.02178	3.75406	5.01915	4.75139	2.30649	2.42438	0.313051	-0.0790932	0.0719199	A5_target
AHRR	ENSG00000286169	ENST00000316418	3.02178	3.75406	5.01915	4.75139	2.30649	2.42438	0.313051	-0.0790932	0.0719199	A5_target
AHRR	ENSG00000063438	ENST00000506456	0.487316	0.624809	1.35093	1.75191	0.405789	0.329446	0.358557	0.374975	-0.300685	A5_target
AHSA1	ENSG00000100591	ENST00000216479	187.1	169.991	90.349	93.4045	237.729	227.675	-0.138356	0.0479828	-0.0623431	non_target
AIDA	ENSG00000186063	ENST00000340020	29.544	27.8984	5.86916	4.33609	11.5147	16.5841	-0.0826866	-0.436758	0.526315	non_target
AIF1L	ENSG00000126878	ENST00000372309	21.6454	21.3259	13.4122	13.4305	37.1049	32.1373	-0.021455	0.00195836	-0.207359	non_target
AIFM1	ENSG00000156709	ENST00000287295	79.4342	75.4009	46.6487	47.6794	64.9029	78.3638	-0.0751781	0.0315306	0.271905	non_target
AIFM2	ENSG00000042286	ENST00000613322	2.38067	1.78501	1.61325	2.19775	3.68239	3.29474	-0.415439	0.446058	-0.160478	A5_target
AIG1	ENSG00000146416	ENST00000275235	10.0633	9.96526	6.47086	4.33847	12.0833	13.2332	-0.0141251	-0.57677	0.131145	non_target
AIMP1	ENSG00000164022	ENST00000394701	30.5717	29.1743	10.8899	9.14885	9.69525	12.6032	-0.0675006	-0.251328	0.378444	non_target
AIMP2	ENSG00000106305	ENST00000223029	62.553	60.0557	40.5448	35.511	91.2946	85.1278	-0.0587784	-0.191251	-0.1009	non_target
AIP	ENSG00000110711	ENST00000279146	42.6783	36.4512	71.0194	72.8355	71.3956	53.4127	-0.227539	0.0364291	-0.418654	non_target
AJM1	ENSG00000232434	ENST00000436881	0.326303	0.493232	3.22027	3.94149	0.384578	0.561513	0.596057	0.291559	0.546044	A5_target
AJUBA	ENSG00000129474	ENST00000262713	4.06986	3.33738	8.14997	8.75813	5.315	4.59305	-0.28626	0.103828	-0.210619	A5_target
AK1	ENSG00000106992	ENST00000223836	31.6056	35.2795	34.9387	30.579	54.9159	57.472	0.158651	-0.192285	0.0656357	non_target
AK2	ENSG00000004455	ENST00000672715	103.717	113.109	75.4585	93.6493	138.722	152.623	0.125066	0.311584	0.137784	non_target
AK3	ENSG00000147853	ENST00000381809	9.9753	9.79954	4.02573	5.20437	3.40777	5.1214	-0.0256473	0.370474	0.587708	A5_target
AK4	ENSG00000162433	ENST00000395334	14.5542	14.0246	6.21508	5.56932	9.93708	12.0588	-0.0534772	-0.158272	0.279196	non_target
AK5	ENSG00000154027	ENST00000354567	0.392787	0.282728	0.580734	0.669428	0.246005	0.0858313	-0.474333	0.20505	-1.51911	non_target
AK6	ENSG00000085231	ENST00000380822	22.9778	22.1951	1.85483	1.68798	8.48128	12.7691	-0.0499973	-0.135987	0.590305	non_target
AK7	ENSG00000140057	ENST00000267584	0.98107	0.776791	0.918656	1.00322	0.290467	0.428765	-0.336829	0.127048	0.561811	non_target
AK8	ENSG00000165695	ENST00000298545	0.45329	0.636242	1.10581	0.347645	0.46456	0.757751	0.489142	-1.66942	0.705858	non_target
AK9	ENSG00000155085	ENST00000424296	0.147086	0.28097	0.075277	0.0867738	0.034787	0.0778805	0.933752	0.20505	1.16272	non_target
AKAP1	ENSG00000121057	ENST00000621116	60.3999	53.8879	79.756	86.9834	41.2392	46.0889	-0.164585	0.125148	0.160404	A5_target
AKAP10	ENSG00000108599	ENST00000225737	6.88792	8.3879	6.91507	10.0653	2.5998	4.17475	0.28424	0.541576	0.683287	A5_target
AKAP11	ENSG00000023516	ENST00000025301	8.02732	9.87518	4.8989	5.53637	1.21332	1.47649	0.29889	0.176481	0.283211	A5_target
AKAP12	ENSG00000131016	ENST00000402676	12.4702	12.1952	27.7681	25.7413	2.40008	2.64368	-0.032165	-0.109348	0.139464	A5_target
AKAP13	ENSG00000170776	ENST00000361243	4.35434	5.37067	12.8422	15.8858	1.58825	2.07399	0.302649	0.306844	0.384964	A5_target
AKAP17A	ENSG00000197976	ENST00000313871	18.8837	19.9297	80.4835	67.694	12.7263	14.6308	0.077781	-0.249664	0.20119	non_target
AKAP3	ENSG00000111254	ENST00000228850	0.708446	0.556297	0.856993	0.411616	0.330027	0.569978	-0.348802	-1.05798	0.78832	non_target
AKAP5	ENSG00000179841	ENST00000394718	1.20265	1.23894	0.58727	0.634651	0.418391	0.282091	0.0428853	0.111941	-0.568691	non_target
AKAP6	ENSG00000151320	ENST00000280979	0.143302	0.211455	0.307214	0.32971	0.0538504	0.0657597	0.561291	0.101957	0.288246	non_target
AKAP7	ENSG00000118507	ENST00000541650	2.63771	3.11733	1.50197	0.410058	1.64389	1.78758	0.241027	-1.87295	0.120895	non_target
AKAP8	ENSG00000105127	ENST00000269701	19.3925	20.2212	38.9364	43.9594	15.9317	17.3602	0.060367	0.175052	0.123877	non_target
AKAP8L	ENSG00000011243	ENST00000397410	42.4694	47.9368	117.103	136.044	53.1976	51.7871	0.174709	0.216299	-0.038768	non_target
AKAP9	ENSG00000127914	ENST00000359028	6.20659	6.31634	7.03785	5.42342	0.467185	0.390786	0.0252881	-0.375932	-0.257616	A5_target
AKIP1	ENSG00000166452	ENST00000309377	11.6948	12.4448	7.35688	8.62421	20.2833	18.2451	0.0896703	0.229298	-0.152786	A5_target
AKIRIN1	ENSG00000174574	ENST00000432648	49.1808	52.6118	25.3927	26.8543	47.1016	56.74	0.0972897	0.0807389	0.26859	non_target
AKIRIN2	ENSG00000135334	ENST00000257787	33.2229	30.7813	35.2928	30.9461	33.8944	34.0413	-0.110126	-0.189619	0.00624034	A5_target
AKNA	ENSG00000106948	ENST00000307564	1.01834	1.21468	2.06483	2.11986	1.20269	1.14442	0.254365	0.0379402	-0.0716496	A5_target
AKR1A1	ENSG00000117448	ENST00000372070	20.7086	17.3856	23.3124	28.6845	26.6705	23.4606	-0.252332	0.299172	-0.185009	non_target
AKR1B1	ENSG00000085662	ENST00000285930	128.897	108.054	134.941	104.059	243.4	182.082	-0.254465	-0.374933	-0.418737	non_target
AKR1C2	ENSG00000151632	ENST00000380753	0.171504	0.0617244	0.169046	0.0730739	0.136709	0.206123	-1.47433	-1.20999	0.5924	non_target
AKR7A2	ENSG00000053371	ENST00000235835	36.8908	31.774	48.133	41.3109	65.5986	49.4015	-0.215414	-0.220505	-0.409109	non_target
AKR7A3	ENSG00000162482	ENST00000361640	1.53164	1.97173	8.3613	9.0359	0.362242	0.347564	0.364387	0.111941	-0.059677	non_target
AKR7L	ENSG00000211454	ENST00000429712	1.52634	0.765138	3.98951	5.644	0.167603	0.375226	-0.996285	0.500506	1.16272	non_target
AKT1	ENSG00000142208	ENST00000554581	38.0354	36.2122	50.7495	46.3283	61.2346	53.1817	-0.070867	-0.1315	-0.203417	non_target
AKT1S1	ENSG00000204673	ENST00000391835	40.5938	41.3411	43.7745	42.2186	76.98	59.052	0.0263175	-0.0522114	-0.382499	non_target
AKT2	ENSG00000105221	ENST00000392038	26.5166	25.5683	45.2619	39.9935	41.1062	31.3701	-0.0525425	-0.17853	-0.389966	A5_target
AKT3	ENSG00000117020	ENST00000673466	7.589	8.22568	4.44743	3.46804	1.8336	2.42629	0.116225	-0.358851	0.404072	non_target
AKTIP	ENSG00000166971	ENST00000300245	4.53003	5.14468	2.4558	3.08822	2.37292	3.8606	0.183561	0.330581	0.702163	non_target
AL021997.3	ENSG00000276302	ENST00000621053	1.799	2.21986	3.13478	1.47827	1.05356	1.26359	0.303275	-1.08446	0.262251	non_target
AL035461.4	ENSG00000286235	ENST00000652720	1.53845	1.52923	1.08314	1.45145	0.225243	0.432232	-0.00866901	0.422281	0.940323	non_target
AL049834.1	ENSG00000042317	ENST00000393545	2.43353	2.35701	1.66671	1.50956	0.916926	1.37244	-0.0460956	-0.142873	0.581869	non_target
AL117348.2	ENSG00000255835	ENST00000432920	1.84993	2.14003	1.36756	2.02682	2.34733	1.90572	0.210166	0.56762	-0.300685	non_target
AL135905.2	ENSG00000285976	ENST00000370651	2.87659	3.35632	1.68063	0.593054	1.79106	2.12909	0.222523	-1.50277	0.249427	A5_target
AL136295.1	ENSG00000254692	ENST00000530611	0.0783662	0.14102	0.231729	0.10017	0.0535431	0.0513735	0.847596	-1.20999	-0.0596769	non_target
AL139300.1	ENSG00000256500	ENST00000472726	1.05719	1.51164	2.53468	3.50615	0.937058	1.06767	0.515886	0.468085	0.188251	non_target
AL159141.1	ENSG00000100599	ENST00000216487	2.78717	2.52782	3.79116	4.20391	4.51322	3.03306	-0.140909	0.149094	-0.573381	A5_target
AL162231.1	ENSG00000187186	ENST00000421828	1.27055	1.06697	4.80064	3.24811	1.06101	0.97174	-0.25194	-0.563624	-0.126791	non_target
AL391987.2	ENSG00000204805	ENST00000605259	12.6699	12.4661	14.8424	18.6111	9.37215	8.18859	-0.0233874	0.326445	-0.194765	A5_target
AL441992.3	ENSG00000286112	ENST00000651925	0.0205379	0.0776116	0.501026	0.433159	0.0315728	0.0201956	1.91798	-0.209987	-0.644639	A5_target
AL445524.2	ENSG00000287856	ENST00000662216	4.20717	4.37214	0.583152	0.806658	7.11443	6.20559	0.0554884	0.468085	-0.19718	non_target
ALAD	ENSG00000148218	ENST00000409155	12.6039	11.8796	17.4004	14.8241	7.61907	8.59246	-0.0853855	-0.231173	0.173456	A5_target
ALAS1	ENSG00000023330	ENST00000394965	31.3396	31.0706	27.6315	35.8048	40.6919	45.0964	-0.0124378	0.373838	0.148271	non_target
ALCAM	ENSG00000170017	ENST00000306107	14.9361	15.2552	10.8389	10.8595	3.21441	3.47342	0.0305016	0.00274205	0.111803	A5_target
ALDH16A1	ENSG00000161618	ENST00000293350	7.41382	7.75533	31.4497	23.2928	10.5569	6.49538	0.0649712	-0.433163	-0.700706	non_target
ALDH18A1	ENSG00000059573	ENST00000371224	60.6632	59.6653	65.3026	65.423	78.2998	77.8146	-0.0239313	0.00265768	-0.00896748	A5_target
ALDH1A2	ENSG00000128918	ENST00000249750	22.9563	17.7564	14.8139	9.48389	20.9707	21.0771	-0.370552	-0.643403	0.00730173	A5_target
ALDH1A3	ENSG00000184254	ENST00000329841	2.08389	1.75988	2.0591	1.66151	1.98769	1.68397	-0.243801	-0.309523	-0.239226	non_target
ALDH1B1	ENSG00000137124	ENST00000377698	34.5345	33.918	28.8846	24.4735	38.8089	39.3979	-0.0259852	-0.23908	0.0217342	non_target
ALDH1L1	ENSG00000144908	ENST00000273450	0.540355	0.461875	1.79755	1.29506	0.761461	0.487071	-0.226405	-0.473022	-0.644639	non_target
ALDH1L2	ENSG00000136010	ENST00000652515	5.55274	5.17518	4.64701	3.88363	1.30638	1.56251	-0.101591	-0.258897	0.258293	non_target
ALDH2	ENSG00000111275	ENST00000261733	5.74183	5.43159	7.17217	6.08584	7.0431	6.7577	-0.0801354	-0.236954	-0.059677	non_target
ALDH3A1	ENSG00000108602	ENST00000457500	0.594905	0.401449	0.329837	0.998056	0.609696	0.511867	-0.567442	1.59737	-0.252322	non_target
ALDH3A2	ENSG00000072210	ENST00000671878	24.5646	24.7218	9.16959	12.3909	20.2258	24.6678	0.00919817	0.434354	0.286431	A5_target
ALDH3B1	ENSG00000006534	ENST00000342456	0.33101	0.412374	0.734096	0.292919	0.391431	0.325493	0.317081	-1.32546	-0.266128	A5_target
ALDH4A1	ENSG00000159423	ENST00000375341	6.52128	5.81008	10.2148	10.8422	10.2822	8.76688	-0.166598	0.0859976	-0.230012	non_target
ALDH5A1	ENSG00000112294	ENST00000348925	6.09615	5.18376	7.98574	5.45055	5.0176	5.00064	-0.2339	-0.551024	-0.0048845	A5_target
ALDH6A1	ENSG00000119711	ENST00000553458	3.99675	4.32943	3.34208	2.16075	2.92772	4.39402	0.115352	-0.629213	0.585767	non_target
ALDH7A1	ENSG00000164904	ENST00000636879	33.5693	28.7672	24.3718	26.8869	25.5463	25.8057	-0.22272	0.141688	0.014572	A5_target
ALDH8A1	ENSG00000118514	ENST00000265605	0.734387	0.762421	1.56604	1.51638	0.0868438	0.138875	0.0540464	-0.0464885	0.677289	A5_target
ALDH9A1	ENSG00000143149	ENST00000354775	52.672	50.7358	29.1444	24.4331	51.0975	57.6681	-0.0540327	-0.254381	0.174519	A5_target
ALDOA	ENSG00000149925	ENST00000642816	131.8	126.294	61.0441	68.8665	260.572	206.057	-0.0615578	0.173949	-0.33864	A5_target
ALDOC	ENSG00000109107	ENST00000395321	19.2445	17.5022	16.7768	16.7357	32.7154	24.7276	-0.136908	-0.0035364	-0.403848	non_target
ALG1	ENSG00000033011	ENST00000262374	26.1522	25.0468	26.952	30.6392	42.1476	40.0766	-0.0623077	0.184985	-0.0726903	A5_target
ALG10	ENSG00000139133	ENST00000266483	4.91414	4.96092	1.9617	3.01507	1.7879	2.34364	0.0136682	0.620088	0.390489	non_target
ALG10B	ENSG00000175548	ENST00000308742	3.21195	3.85241	0.758133	0.79199	0.635006	1.08549	0.262313	0.0630312	0.773504	non_target
ALG11	ENSG00000253710	ENST00000521508	1.23139	1.38888	0.438896	0.379445	0.439448	0.951396	0.17364	-0.209987	1.11435	A5_target
ALG12	ENSG00000182858	ENST00000330817	9.42688	9.38077	16.3499	15.7573	11.9183	11.2241	-0.0070754	-0.0532618	-0.0865812	A5_target
ALG13	ENSG00000101901	ENST00000394780	13.2255	16.384	15.6303	15.6151	4.15548	5.90364	0.308959	-0.00140065	0.506589	A5_target
ALG14	ENSG00000172339	ENST00000370205	1.75596	1.63213	1.0159	0.966118	1.6979	2.31978	-0.105504	-0.0724838	0.450235	non_target
ALG1L	ENSG00000189366	ENST00000611639	3.0631	3.19699	4.75523	5.08994	6.59245	5.4217	0.0617203	0.098135	-0.282069	non_target
ALG2	ENSG00000119523	ENST00000476832	16.6701	17.2006	10.9667	9.48118	11.6248	16.4174	0.0451955	-0.209987	0.498013	A5_target
ALG3	ENSG00000214160	ENST00000397676	34.0348	37.3449	26.1829	30.0639	56.339	52.7409	0.1339	0.199404	-0.0952101	A5_target
ALG5	ENSG00000120697	ENST00000239891	39.3396	39.3051	19.5325	18.9131	37.3089	43.938	-0.00126296	-0.0464885	0.235951	non_target
ALG6	ENSG00000088035	ENST00000263440	18.4694	17.4778	2.91211	2.22874	6.70666	9.71585	-0.0796151	-0.385837	0.534746	non_target
ALG8	ENSG00000159063	ENST00000299626	57.9329	54.4776	28.5081	24.3112	38.6711	50.3893	-0.0887192	-0.229751	0.381863	non_target
ALG9	ENSG00000086848	ENST00000616540	1.49937	1.28003	0.592868	1.02512	0.8934	1.18865	-0.228172	0.790013	0.411944	non_target
ALKAL1	ENSG00000196711	ENST00000358543	4.83442	2.71154	8.91139	5.53746	2.38079	3.39561	-0.834229	-0.686425	0.512229	non_target
ALKBH1	ENSG00000100601	ENST00000216489	12.4298	13.0931	4.64528	7.39799	12.3716	13.4422	0.075006	0.671368	0.119732	A5_target
ALKBH2	ENSG00000189046	ENST00000429722	42.884	35.6924	54.2117	55.1257	54.5804	46.8217	-0.264824	0.0241199	-0.221205	non_target
ALKBH3	ENSG00000166199	ENST00000302708	21.4631	21.6721	17.6828	19.7316	26.7001	29.584	0.0139848	0.158164	0.147971	non_target
ALKBH4	ENSG00000160993	ENST00000292566	15.8066	14.813	13.9613	15.8749	30.7863	24.1559	-0.0936607	0.185314	-0.349914	non_target
ALKBH5	ENSG00000091542	ENST00000399138	49.4836	18.9344	39.3443	19.5488	72.0305	22.3466	-1.38594	-1.00907	-1.68855	A5_target
ALKBH6	ENSG00000239382	ENST00000378875	9.04796	10.881	29.8544	24.5411	13.0424	12.5862	0.266147	-0.282744	-0.0513617	A5_target
ALKBH7	ENSG00000125652	ENST00000245812	10.1828	9.24161	30.274	25.7488	25.1068	18.2122	-0.139914	-0.233574	-0.463173	non_target
ALKBH8	ENSG00000137760	ENST00000417449	9.44621	8.22505	4.35505	7.01094	1.94315	2.63016	-0.19971	0.686919	0.436749	non_target
ALMS1	ENSG00000116127	ENST00000613296	4.45669	5.02842	10.0074	11.5571	0.753638	0.7231	0.174133	0.207719	-0.059677	A5_target
ALOX5	ENSG00000012779	ENST00000374391	0.0852416	0.245427	0.693162	0.326874	0.145602	0.083821	1.52567	-1.08446	-0.796643	non_target
ALOXE3	ENSG00000179148	ENST00000380149	0.489653	0.482706	0.613784	0.734738	0.654558	0.334952	-0.0206146	0.259498	-0.966568	non_target
ALPK1	ENSG00000073331	ENST00000650871	0.927989	0.901755	1.55823	1.22007	0.312492	0.482334	-0.0413732	-0.352945	0.626214	non_target
ALPK3	ENSG00000136383	ENST00000258888	0.0655624	0.0637089	0.348962	0.22627	0.00671925	0.0322349	-0.0413732	-0.625025	2.26225	A5_target
ALPL	ENSG00000162551	ENST00000374840	9.00326	5.72888	7.63626	4.32911	12.9874	8.46468	-0.652194	-0.818797	-0.617583	A5_target
ALS2	ENSG00000003393	ENST00000264276	9.14652	10.0723	11.3432	12.1299	3.27483	4.92408	0.1391	0.0967384	0.588433	A5_target
ALS2CL	ENSG00000178038	ENST00000318962	0.291368	0.346049	4.13555	1.84355	0.313543	0.22921	0.248133	-1.16559	-0.451994	A5_target
ALX1	ENSG00000180318	ENST00000316824	7.57658	9.28276	7.38852	7.62404	5.28678	7.23896	0.293007	0.0452698	0.453393	non_target
ALX4	ENSG00000052850	ENST00000652299	6.09889	6.12618	9.72859	7.38042	7.62104	6.55028	0.00644107	-0.398528	-0.218431	A5_target
ALYREF	ENSG00000183684	ENST00000505490	176.946	180.411	197.369	210.415	312.674	277.421	0.02798	0.0923468	-0.172585	non_target
AMACR	ENSG00000242110	ENST00000382085	7.30719	5.94951	3.45363	3.67485	5.34042	5.5363	-0.296545	0.089573	0.0519684	non_target
AMBRA1	ENSG00000110497	ENST00000458649	11.8109	13.2144	21.744	23.5432	15.3398	15.047	0.161988	0.114694	-0.0278	A5_target
AMD1	ENSG00000123505	ENST00000672937	61.8089	70.6875	14.0449	14.9125	26.8189	36.3819	0.193641	0.0864764	0.439967	A5_target
AMDHD1	ENSG00000139344	ENST00000266736	0.257231	0.243016	0.213927	0.1233	0.09886	0.031618	-0.0820152	-0.79495	-1.64464	non_target
AMDHD2	ENSG00000162066	ENST00000413459	5.37944	6.63792	24.0154	24.513	8.55619	5.77068	0.303275	0.0295882	-0.568226	non_target
AMER1	ENSG00000184675	ENST00000374869	4.43563	6.10363	10.8	10.0554	3.72573	4.09381	0.46053	-0.103072	0.135921	A5_target
AMFR	ENSG00000159461	ENST00000290649	28.1972	28.7734	24.8641	29.6	41.8324	40.9373	0.0291827	0.251532	-0.0312041	non_target
AMH	ENSG00000104899	ENST00000221496	1.14741	1.53789	64.0552	63.7233	0.689342	0.389064	0.422574	-0.00749441	-0.825212	non_target
AMHR2	ENSG00000135409	ENST00000257863	0.393463	0.386202	0.713946	0.411492	0.513222	0.457252	-0.0268736	-0.79495	-0.166592	non_target
AMIGO1	ENSG00000181754	ENST00000369864	2.10677	2.1843	2.25879	2.46109	2.9885	2.45581	0.0521343	0.12375	-0.28322	A5_target
AMIGO2	ENSG00000139211	ENST00000266581	0.399432	0.266975	0.464011	0.145876	0.175442	0.149629	-0.581248	-1.66942	-0.229602	non_target
AMIGO3	ENSG00000176020	ENST00000320431	3.55868	4.38347	14.3394	16.2411	4.28926	3.91831	0.300733	0.179665	-0.130498	non_target
AMMECR1	ENSG00000101935	ENST00000262844	8.96354	8.59458	3.76808	3.74504	2.37201	3.55197	-0.0606415	-0.0088474	0.58251	non_target
AMMECR1L	ENSG00000144233	ENST00000272647	16.2111	17.4865	14.6534	15.6736	11.4173	12.934	0.109262	0.0971023	0.179953	A5_target
AMN1	ENSG00000151743	ENST00000281471	1.43002	1.544	0.406593	0.281215	0.751579	1.44225	0.11063	-0.531915	0.940323	non_target
AMOT	ENSG00000126016	ENST00000371959	153.3	128.943	332.173	230.59	48.4484	53.8032	-0.249628	-0.526603	0.151244	A5_target
AMOTL1	ENSG00000166025	ENST00000433060	13.0875	14.4317	19.6031	20.0806	8.28297	10.5651	0.141058	0.0347186	0.351086	A5_target
AMOTL2	ENSG00000114019	ENST00000514516	3.27713	3.86309	5.23145	4.67459	2.75828	3.11355	0.237322	-0.162369	0.174788	A5_target
AMPD2	ENSG00000116337	ENST00000667949	22.098	21.6577	51.9838	37.6914	22.4331	16.88	-0.029037	-0.463826	-0.410318	non_target
AMPD3	ENSG00000133805	ENST00000396554	0.169251	0.162436	0.291944	0.216342	0.0770931	0.0554769	-0.0592951	-0.43238	-0.474714	non_target
AMPH	ENSG00000078053	ENST00000356264	2.95267	2.25317	5.21892	3.40528	2.6848	1.76827	-0.390064	-0.61598	-0.60247	non_target
AMY2B	ENSG00000240038	ENST00000361355	0.787615	1.27558	1.01893	1.13259	0.0336332	0.0645408	0.695592	0.152583	0.940323	non_target
AMZ2	ENSG00000196704	ENST00000577985	18.5517	18.0101	13.5033	14.7144	15.8603	18.1489	-0.0427439	0.123913	0.194461	A5_target
ANAPC1	ENSG00000153107	ENST00000341068	25.5887	28.0761	24.7447	26.414	15.9145	19.758	0.133837	0.0941858	0.312097	A5_target
ANAPC10	ENSG00000164162	ENST00000613466	7.90997	8.77121	3.79293	2.29541	4.4696	5.2555	0.149104	-0.72456	0.233682	non_target
ANAPC11	ENSG00000141552	ENST00000357385	7.39305	6.92967	21.4408	20.5615	13.9881	10.0659	-0.093384	-0.0604109	-0.474714	non_target
ANAPC13	ENSG00000129055	ENST00000510994	32.6753	31.4576	10.611	8.50246	24.5577	31.251	-0.0547937	-0.319612	0.347729	non_target
ANAPC15	ENSG00000110200	ENST00000543050	16.0533	15.226	6.49098	9.18286	19.2702	19.4487	-0.076333	0.500506	0.0133025	A5_target
ANAPC16	ENSG00000166295	ENST00000621663	13.2233	13.3673	4.31657	6.46344	11.1049	15.0747	0.0156219	0.582417	0.440936	non_target
ANAPC2	ENSG00000176248	ENST00000323927	18.4395	18.4538	49.3839	45.5892	23.5672	18.5299	0.00111644	-0.11535	-0.34693	non_target
ANAPC4	ENSG00000053900	ENST00000510092	9.77643	9.18784	3.9088	4.43538	3.13286	2.78927	-0.0895823	0.18233	-0.167592	non_target
ANAPC5	ENSG00000089053	ENST00000261819	85.9784	82.4729	85.4722	82.5316	106.44	91.8462	-0.0600535	-0.0505091	-0.212753	A5_target
ANAPC7	ENSG00000196510	ENST00000455511	39.8655	36.5965	36.1257	42.5444	36.2314	33.3302	-0.123435	0.235944	-0.12041	A5_target
ANG	ENSG00000214274	ENST00000336811	1.64	1.32803	2.98763	2.47064	1.68078	1.09431	-0.304408	-0.274118	-0.619104	non_target
ANGEL1	ENSG00000013523	ENST00000251089	14.6973	15.1755	18.7584	20.0176	18.1383	15.8524	0.0461882	0.0937332	-0.194339	A5_target
ANGEL2	ENSG00000174606	ENST00000366962	11.6137	10.7103	4.50141	5.7351	5.23958	6.31785	-0.116827	0.34944	0.269982	non_target
ANGPTL6	ENSG00000130812	ENST00000253109	0.339037	0.406731	0.668354	1.73347	0.347467	0.444516	0.262633	1.37498	0.355361	A5_target
ANK1	ENSG00000029534	ENST00000265709	1.31701	1.94154	4.19396	4.59709	1.39302	1.56902	0.559937	0.132405	0.171649	A5_target
ANK2	ENSG00000145362	ENST00000672209	1.38528	1.28867	3.19977	2.26087	0.407741	0.428927	-0.104294	-0.501092	0.0730782	A5_target
ANK3	ENSG00000151150	ENST00000280772	0.820085	1.21692	1.8747	1.51594	0.163785	0.186097	0.569389	-0.30645	0.184249	A5_target
ANKAR	ENSG00000151687	ENST00000520309	0.600512	0.420566	0.359941	0.373422	0.0166336	0.0319191	-0.513861	0.0530471	0.940323	non_target
ANKDD1A	ENSG00000166839	ENST00000319580	0.138487	0.199365	0.153564	0.0885087	0.023655	0.136179	0.525667	-0.79495	2.52529	non_target
ANKEF1	ENSG00000132623	ENST00000378392	2.39944	2.24905	1.05257	1.51666	1.33764	1.50383	-0.093384	0.526978	0.168947	non_target
ANKFN1	ENSG00000153930	ENST00000653862	0.100315	0.0361032	0.259551	0.25645	0.0342696	0.032881	-1.47433	-0.0173422	-0.059677	non_target
ANKFY1	ENSG00000185722	ENST00000570535	18.7526	21.8626	26.1034	28.645	10.3023	12.9473	0.221377	0.134049	0.329683	non_target
ANKH	ENSG00000154122	ENST00000284268	4.56988	4.73636	2.9979	2.64198	4.67457	5.60858	0.0516215	-0.182331	0.262803	A5_target
ANKHD1	ENSG00000131503	ENST00000360839	0.820989	0.735541	0.581089	0.73682	0.304337	0.283416	-0.158557	0.342554	-0.102746	A5_target
ANKHD1-EIF4EBP3	ENSG00000254996	ENST00000532219	0.486075	0.337381	1.03949	0.665694	0.213497	0.16217	-0.5268	-0.642947	-0.396712	non_target
ANKIB1	ENSG00000001629	ENST00000265742	6.7849	8.30078	8.58766	8.70151	1.49254	1.8095	0.29092	0.0189996	0.277824	A5_target
ANKLE1	ENSG00000160117	ENST00000394458	0.378113	0.480292	2.31837	3.32634	0.273539	0.218713	0.345095	0.520826	-0.322711	A5_target
ANKLE2	ENSG00000176915	ENST00000357997	40.4185	41.6869	54.5022	60.6335	28.8622	34.0102	0.0445755	0.153803	0.236785	A5_target
ANKMY1	ENSG00000144504	ENST00000401804	1.77165	1.76938	6.04093	4.92543	1.56604	1.04527	-0.00184481	-0.294521	-0.583239	non_target
ANKMY2	ENSG00000106524	ENST00000306999	9.11576	9.06607	4.2091	4.30058	3.09449	4.21329	-0.00788455	0.0310208	0.445246	non_target
ANKRA2	ENSG00000164331	ENST00000296785	3.47771	3.61183	3.74615	4.19128	2.41006	2.60552	0.0545959	0.161982	0.112504	A5_target
ANKRD1	ENSG00000148677	ENST00000371697	0.253169	0.429544	0.481255	0.416067	0.0741325	0.0711286	0.762707	-0.209987	-0.059677	non_target
ANKRD10	ENSG00000088448	ENST00000267339	15.7493	15.7655	18.3228	22.0012	8.70253	10.3527	0.00148943	0.263944	0.250506	non_target
ANKRD11	ENSG00000167522	ENST00000301030	21.7625	33.0353	90.298	103.046	6.99549	6.96931	0.602166	0.190526	-0.00540992	non_target
ANKRD12	ENSG00000101745	ENST00000262126	2.13125	3.12294	1.49112	1.77561	0.188521	0.149695	0.551203	0.251917	-0.332695	non_target
ANKRD13A	ENSG00000076513	ENST00000261739	12.0332	11.9718	11.7525	14.2378	9.72058	12.6126	-0.00737878	0.276752	0.375752	A5_target
ANKRD13B	ENSG00000198720	ENST00000394859	10.3229	12.2993	22.7593	22.9623	13.2657	12.3713	0.252737	0.01281	-0.100704	A5_target
ANKRD13C	ENSG00000118454	ENST00000370944	12.2074	14.792	9.51058	11.1571	3.28006	5.4733	0.277062	0.230361	0.738689	A5_target
ANKRD13D	ENSG00000172932	ENST00000511455	9.21589	9.07882	28.1216	31.7286	7.13548	5.75489	-0.0216179	0.174107	-0.31022	non_target
ANKRD16	ENSG00000134461	ENST00000380094	3.03681	3.10925	8.76695	12.5487	3.43428	3.21789	0.0340086	0.517392	-0.0938927	A5_target
ANKRD17	ENSG00000132466	ENST00000358602	24.6603	25.3946	35.7545	35.9446	6.86867	7.91362	0.0423333	0.00765162	0.204308	A5_target
ANKRD18A	ENSG00000180071	ENST00000399703	1.83848	2.31584	14.3904	11.4044	0.369449	0.460822	0.333022	-0.335518	0.318835	A5_target
ANKRD18B	ENSG00000230453	ENST00000290943	2.01084	1.7205	5.76373	6.25604	0.369395	0.578275	-0.224973	0.118245	0.646592	non_target
ANKRD20A4	ENSG00000172014	ENST00000357336	0.103806	0.13076	0.844126	0.265376	0.0177312	0.0170127	0.333022	-1.66942	-0.0596769	non_target
ANKRD23	ENSG00000163126	ENST00000318357	1.10796	1.58506	10.9959	8.07251	0.65292	0.571988	0.516622	-0.445876	-0.190922	non_target
ANKRD24	ENSG00000089847	ENST00000262970	0.173584	0.333189	0.727157	1.18336	0.2372	0.170691	0.940705	0.70255	-0.474714	A5_target
ANKRD26	ENSG00000107890	ENST00000436985	2.39036	2.00357	2.69711	2.13076	0.171915	0.134021	-0.254655	-0.340048	-0.359237	A5_target
ANKRD27	ENSG00000105186	ENST00000306065	17.2153	18.5002	17.6212	16.349	10.7913	12.7996	0.103847	-0.108108	0.246231	A5_target
ANKRD28	ENSG00000206560	ENST00000399451	9.61741	8.99469	6.21491	5.10128	2.7491	2.84143	-0.0965761	-0.284874	0.0476571	A5_target
ANKRD29	ENSG00000154065	ENST00000592179	0.760756	0.798572	0.937314	0.64828	0.346521	0.436379	0.0699879	-0.531915	0.33264	non_target
ANKRD33B	ENSG00000164236	ENST00000296657	2.99409	3.23272	4.91801	4.29479	1.5534	1.87959	0.11063	-0.195488	0.274987	A5_target
ANKRD34A	ENSG00000272031	ENST00000606888	1.50808	1.47831	3.91664	2.28277	1.62693	1.52198	-0.0287731	-0.77883	-0.0962028	A5_target
ANKRD34B	ENSG00000189127	ENST00000338682	1.41998	0.911602	1.23413	0.809415	0.235992	0.132084	-0.639392	-0.608537	-0.837285	non_target
ANKRD36	ENSG00000135976	ENST00000652721	0.891982	1.12527	11.1403	11.6656	0.0866046	0.240053	0.33519	0.0664676	1.47084	A5_target
ANKRD36B	ENSG00000196912	ENST00000258459	0.765247	0.800417	5.96645	6.78598	0.159306	0.129335	0.0648262	0.185685	-0.300685	non_target
ANKRD36C	ENSG00000174501	ENST00000456556	0.817542	0.726092	13.8907	13.703	0.0675701	0.0518657	-0.171141	-0.0196219	-0.381605	A5_target
ANKRD37	ENSG00000186352	ENST00000335174	0.639058	0.39428	1.01233	1.75042	0.654947	0.628408	-0.696725	0.790013	-0.059677	non_target
ANKRD39	ENSG00000213337	ENST00000393537	15.1654	11.9557	16.7276	14.4617	20.9701	18.0688	-0.343088	-0.209987	-0.214827	non_target
ANKRD40	ENSG00000154945	ENST00000285243	23.6405	26.749	17.0698	18.5129	13.6813	21.101	0.178221	0.117084	0.62511	A5_target
ANKRD42	ENSG00000137494	ENST00000533342	2.72459	3.31529	3.02122	5.14104	1.21887	2.25392	0.283097	0.766929	0.886884	A5_target
ANKRD44	ENSG00000065413	ENST00000647377	0.644547	0.845807	0.813683	1.25483	0.091464	0.331529	0.392043	0.624953	1.85786	non_target
ANKRD46	ENSG00000186106	ENST00000520552	7.21688	5.86697	3.57764	5.53489	3.65465	4.71716	-0.298761	0.629548	0.368185	A5_target
ANKRD49	ENSG00000168876	ENST00000544612	9.6408	12.3128	3.82692	5.03474	3.57544	5.27494	0.352933	0.395734	0.561036	A5_target
ANKRD50	ENSG00000151458	ENST00000504087	3.72597	4.91887	4.25793	4.21151	0.958823	0.887971	0.400709	-0.0158147	-0.110751	A5_target
ANKRD52	ENSG00000139645	ENST00000267116	23.8939	27	30.3169	31.4587	30.7747	28.9602	0.176318	0.0533371	-0.0876758	A5_target
ANKRD54	ENSG00000100124	ENST00000215941	18.3823	19.6252	26.5444	34.1931	26.5368	22.3252	0.0943893	0.365297	-0.249322	non_target
ANKRD6	ENSG00000135299	ENST00000339746	3.12005	3.09519	3.6963	3.98813	1.29818	1.63892	-0.0115419	0.109631	0.336252	A5_target
ANKRD61	ENSG00000157999	ENST00000409061	0.150895	0.108614	0.111549	0.96439	0.0515489	0.0989202	-0.474333	3.11194	0.940323	non_target
ANKRD63	ENSG00000230778	ENST00000434396	0.438339	0.405664	8.74912	6.00318	0.577591	0.677339	-0.111763	-0.543411	0.22983	non_target
ANKRD9	ENSG00000156381	ENST00000286918	1.98551	1.80951	8.90142	6.59045	2.3412	1.80547	-0.133908	-0.433659	-0.374879	A5_target
ANKS1A	ENSG00000064999	ENST00000649117	5.71066	6.22085	14.2479	14.8597	5.38235	5.71577	0.123454	0.0606603	0.0867125	A5_target
ANKS3	ENSG00000168096	ENST00000304283	5.80962	6.04961	18.038	20.0007	6.03345	5.99209	0.0584	0.149016	-0.00992393	non_target
ANKS6	ENSG00000165138	ENST00000353234	11.1991	11.5327	16.4695	15.4983	13.8342	11.6291	0.042355	-0.0876832	-0.250499	non_target
ANKZF1	ENSG00000163516	ENST00000323348	12.3987	15.182	41.1209	39.8731	8.98154	9.33804	0.292166	-0.044454	0.056157	non_target
ANLN	ENSG00000011426	ENST00000265748	27.9883	31.0521	63.9835	65.208	2.37226	2.75219	0.149863	0.0273499	0.214317	A5_target
ANO1	ENSG00000131620	ENST00000355303	0.11954	0.0645336	0.463941	0.114599	0.107198	0.0881608	-0.88937	-2.01734	-0.282069	non_target
ANO10	ENSG00000160746	ENST00000292246	7.10073	5.65814	9.50895	6.87251	6.64953	6.31316	-0.32764	-0.468449	-0.0748901	A5_target
ANO2	ENSG00000047617	ENST00000546188	0.154672	0.0834997	0.428779	0.370699	0.0396294	0.114071	-0.88937	-0.209987	1.52529	non_target
ANO4	ENSG00000151572	ENST00000644049	1.26297	0.997279	1.71401	1.22884	0.425017	0.463403	-0.340749	-0.480076	0.124748	non_target
ANO5	ENSG00000171714	ENST00000324559	2.58275	2.59107	2.02863	1.69194	0.551452	0.391539	0.00463923	-0.261826	-0.49408	non_target
ANO6	ENSG00000177119	ENST00000423947	11.3396	11.7519	5.88331	6.38292	3.46513	5.77989	0.0515294	0.117587	0.738134	A5_target
ANO7	ENSG00000146205	ENST00000274979	0.866939	0.82371	1.26895	1.59573	1.17281	0.733143	-0.0737947	0.330581	-0.677806	non_target
ANO8	ENSG00000074855	ENST00000159087	1.28485	1.73868	7.63656	6.43792	1.45725	0.977056	0.4364	-0.246329	-0.576735	non_target
ANP32A	ENSG00000140350	ENST00000465139	161.453	147.907	75.4637	70.7536	88.6562	124.812	-0.126428	-0.0929802	0.493464	A5_target
ANP32B	ENSG00000136938	ENST00000339399	252.176	242.884	157.236	136.955	198.941	236.488	-0.0541616	-0.199224	0.249425	non_target
ANP32E	ENSG00000143401	ENST00000583931	76.4064	77.0748	17.8908	16.998	18.2363	23.4261	0.0125668	-0.0738506	0.36131	A5_target
ANTKMT	ENSG00000103254	ENST00000569529	5.10071	4.79662	33.7538	29.3394	9.19034	8.08985	-0.0886789	-0.20221	-0.184005	A5_target
ANTXR1	ENSG00000169604	ENST00000303714	9.44309	9.64173	6.06869	7.07361	3.80605	5.94623	0.0300329	0.221063	0.64368	A5_target
ANTXR2	ENSG00000163297	ENST00000307333	2.52673	1.57391	2.47854	3.35396	1.04578	0.716718	-0.682919	0.436376	-0.545104	non_target
ANXA1	ENSG00000135046	ENST00000376911	2.5273	3.70827	0.862295	2.36073	0.763759	1.87982	0.553148	1.45298	1.2994	non_target
ANXA11	ENSG00000122359	ENST00000438331	16.288	14.546	16.3406	16.5507	25.4238	22.0189	-0.163185	0.0184289	-0.207436	A5_target
ANXA2	ENSG00000182718	ENST00000332680	95.4161	105.911	88.4909	115.945	111.758	142.811	0.150543	0.389833	0.35372	non_target
ANXA2R	ENSG00000177721	ENST00000314890	0.288348	0.830213	0.142107	0.982866	0.229847	0.598591	1.52567	2.79001	1.3809	non_target
ANXA3	ENSG00000138772	ENST00000264908	0.499822	0.917418	0.443391	0.191666	0.358574	0.688089	0.876165	-1.20999	0.940323	non_target
ANXA4	ENSG00000196975	ENST00000394295	5.6428	5.59697	3.83213	3.83071	5.36805	5.81426	-0.0117667	-0.00053391	0.115197	non_target
ANXA5	ENSG00000164111	ENST00000296511	147.3	149.085	81.499	78.7538	196.507	195.161	0.0173779	-0.0494323	-0.00991279	non_target
ANXA6	ENSG00000197043	ENST00000354546	48.0632	43.4945	73.4605	56.9072	80.9459	64.413	-0.144099	-0.368359	-0.329606	non_target
ANXA7	ENSG00000138279	ENST00000372919	36.9396	39.066	20.5171	20.3261	31.987	37.5542	0.0807486	-0.0134967	0.231489	non_target
ANXA8	ENSG00000265190	ENST00000611843	0.131692	0.0355469	0.146029	0.378747	0.0337415	0.0647486	-1.88937	1.37498	0.940323	non_target
ANXA9	ENSG00000143412	ENST00000368947	0.0461473	0.0498252	0.102343	0.353921	0.0472947	0.181513	0.11063	1.79001	1.94032	non_target
AOC2	ENSG00000131480	ENST00000253799	2.032	2.42489	6.28532	10.6628	0.931654	1.02536	0.25502	0.762532	0.138262	A5_target
AOC3	ENSG00000131471	ENST00000308423	0.678093	0.77067	1.54341	2.25813	0.274323	0.526415	0.184631	0.549005	0.940323	A5_target
AOPEP	ENSG00000148120	ENST00000375315	2.12259	2.36568	8.09868	5.8639	2.22214	1.975	0.156434	-0.465826	-0.170101	non_target
AP000812.5	ENSG00000284922	ENST00000643715	1.21434	0.848372	0.633669	0.821753	1.53736	1.96675	-0.517401	0.374975	0.355361	non_target
AP001273.2	ENSG00000284057	ENST00000638767	2.41531	2.27215	3.34121	1.65064	1.10288	1.24632	-0.0881499	-1.01734	0.17639	non_target
AP001453.5	ENSG00000286264	ENST00000652762	1.55984	1.44357	15.4188	12.3048	1.50728	1.18325	-0.111763	-0.325464	-0.349184	A5_target
AP001781.2	ENSG00000258529	ENST00000622211	0.730601	0.762535	0.270048	0.280162	0.923478	1.0058	0.0617203	0.0530471	0.123187	non_target
AP002495.1	ENSG00000254469	ENST00000529844	0.643005	0.824425	3.3868	4.62322	0.535431	0.632289	0.358557	0.448976	0.239883	non_target
AP006333.1	ENSG00000126500	ENST00000246841	0.761238	0.5088	1.16568	1.66806	0.594411	0.641616	-0.581248	0.516994	0.110248	A5_target
AP1AR	ENSG00000138660	ENST00000274000	7.33291	7.21183	3.70335	2.55209	2.00902	2.72484	-0.0240196	-0.537152	0.439677	A5_target
AP1B1	ENSG00000100280	ENST00000357586	47.0822	46.7449	70.3584	67.7619	76.1295	61.3817	-0.0103724	-0.0542478	-0.310645	non_target
AP1G1	ENSG00000166747	ENST00000393512	24.323	28.0682	26.8606	29.4861	10.4529	14.4955	0.206617	0.134542	0.471704	A5_target
AP1G2	ENSG00000213983	ENST00000308724	9.37543	10.9662	41.4403	35.4525	6.98399	5.80468	0.226107	-0.225147	-0.266835	A5_target
AP1M1	ENSG00000072958	ENST00000444449	43.3597	41.833	36.4037	33.7292	64.4348	57.8038	-0.0517151	-0.110089	-0.156677	non_target
AP1M2	ENSG00000129354	ENST00000590923	0.488841	0.615769	0.632407	0.468638	0.626244	0.801158	0.333022	-0.43238	0.355361	non_target
AP1S1	ENSG00000106367	ENST00000337619	47.5217	46.3926	28.3546	21.4916	80.3544	79.2799	-0.0346931	-0.399812	-0.019423	non_target
AP1S2	ENSG00000182287	ENST00000380291	6.90739	7.19234	1.59098	2.12216	1.74353	4.01087	0.058321	0.415617	1.20191	non_target
AP1S3	ENSG00000152056	ENST00000443700	1.8044	1.90492	1.06712	1.07634	1.27394	1.26174	0.0782084	0.0124051	-0.0138733	non_target
AP2A1	ENSG00000196961	ENST00000359032	26.1815	28.2917	36.8093	34.4961	39.2219	32.642	0.11183	-0.0936365	-0.264928	A5_target
AP2A2	ENSG00000183020	ENST00000332231	21.6445	20.6642	39.0017	36.1945	25.3179	23.8687	-0.0668717	-0.107764	-0.0850357	A5_target
AP2B1	ENSG00000006125	ENST00000610402	63.4502	70.3103	43.2481	46.9962	55.1957	69.4927	0.148112	0.119908	0.332304	A5_target
AP2M1	ENSG00000161203	ENST00000411763	143.467	126.871	95.8242	90.5022	224.342	184.367	-0.177356	-0.0824372	-0.283117	non_target
AP2S1	ENSG00000042753	ENST00000601498	105.608	89.3269	80.9579	70.2974	201.274	172.976	-0.241556	-0.203701	-0.218593	non_target
AP3B1	ENSG00000132842	ENST00000255194	14.0501	13.8991	11.3653	12.4586	4.25951	5.36483	-0.0155878	0.132502	0.332843	A5_target
AP3B2	ENSG00000103723	ENST00000652847	1.25265	1.26926	3.16271	4.28621	1.22454	1.30758	0.0189994	0.43854	0.0946512	A5_target
AP3D1	ENSG00000065000	ENST00000643116	62.8555	67.3616	97.3715	90.6576	75.2658	67.9916	0.0998866	-0.103072	-0.146637	non_target
AP3M1	ENSG00000185009	ENST00000355264	24.0537	27.8259	6.66039	7.39193	10.9373	17.6366	0.210166	0.150344	0.689324	non_target
AP3M2	ENSG00000070718	ENST00000518421	13.8116	16.8712	15.4018	20.1978	8.497	9.8216	0.288683	0.391095	0.209004	A5_target
AP3S1	ENSG00000177879	ENST00000316788	41.9575	40.9409	10.3252	8.81903	28.7438	38.5003	-0.0353851	-0.227475	0.421622	non_target
AP3S2	ENSG00000157823	ENST00000558011	6.49796	9.52898	3.44139	3.34714	12.6233	10.872	0.552335	-0.0400623	-0.215472	non_target
AP4B1	ENSG00000134262	ENST00000369569	11.8877	11.6418	17.9095	17.2136	6.88923	6.14426	-0.0301624	-0.0571784	-0.165103	non_target
AP4E1	ENSG00000081014	ENST00000261842	3.4073	3.782	2.30698	1.70956	0.772377	1.09596	0.150523	-0.43238	0.504821	A5_target
AP4M1	ENSG00000221838	ENST00000429084	7.60187	6.90291	12.9685	12.5572	10.3878	9.5069	-0.139148	-0.0464885	-0.127848	non_target
AP4S1	ENSG00000100478	ENST00000216366	0.888336	0.993391	1.54794	1.58158	0.487727	0.967124	0.161256	0.0310208	0.987629	non_target
AP5B1	ENSG00000254470	ENST00000532090	5.88593	7.28504	14.4407	14.1165	9.72099	8.833	0.307667	-0.03276	-0.138199	A5_target
AP5M1	ENSG00000053770	ENST00000431972	14.9459	16.1796	3.93556	2.87319	5.01152	6.66978	0.114431	-0.453913	0.412391	non_target
AP5S1	ENSG00000125843	ENST00000615891	4.07703	3.78339	5.31871	8.02142	6.92303	5.88261	-0.107839	0.59278	-0.234947	non_target
AP5Z1	ENSG00000242802	ENST00000649063	3.72824	4.72423	18.5462	22.0903	4.39143	3.8316	0.341584	0.252284	-0.196745	non_target
APAF1	ENSG00000120868	ENST00000551964	3.85219	3.86111	3.61554	3.68038	1.09142	1.71946	0.00333591	0.025641	0.655755	non_target
APBA1	ENSG00000107282	ENST00000265381	0.401433	0.409999	0.697785	0.707278	0.344699	0.373406	0.0304596	0.0194946	0.11541	A5_target
APBA2	ENSG00000034053	ENST00000558402	8.36308	7.66846	15.3969	13.9582	10.7183	9.48084	-0.125097	-0.141532	-0.176992	non_target
APBA3	ENSG00000011132	ENST00000316757	6.41407	6.35705	22.6138	23.3346	8.56247	6.40422	-0.0128846	0.0452698	-0.419005	non_target
APBB1	ENSG00000166313	ENST00000389906	16.1336	14.2523	24.5435	19.1226	25.1711	19.7457	-0.178877	-0.36006	-0.350228	non_target
APBB2	ENSG00000163697	ENST00000508593	2.31638	2.8223	3.51395	2.37486	0.865511	1.51061	0.285001	-0.565253	0.803506	A5_target
APBB3	ENSG00000113108	ENST00000354402	5.10117	6.27625	34.027	26.3851	2.87743	2.48863	0.299075	-0.366957	-0.209424	non_target
APC	ENSG00000134982	ENST00000257430	8.50549	10.5984	12.3381	12.2566	0.712708	0.696979	0.317383	-0.00956019	-0.0321962	A5_target
APC2	ENSG00000115266	ENST00000535453	0.171936	0.172379	1.48439	0.965433	0.201384	0.138879	0.00371472	-0.62062	-0.536115	A5_target
APCDD1	ENSG00000154856	ENST00000355285	0.828104	0.629936	2.50435	0.93822	0.88727	0.703262	-0.394605	-1.41644	-0.335311	non_target
APEH	ENSG00000164062	ENST00000438011	39.4312	35.358	63.0278	58.0905	62.1015	48.7258	-0.157303	-0.117686	-0.349942	non_target
APEX1	ENSG00000100823	ENST00000216714	196.842	191.522	195.222	204.385	224.555	232.749	-0.0395291	0.0661736	0.0517027	non_target
APEX2	ENSG00000169188	ENST00000374987	17.8329	20.2562	17.9366	17.8797	27.3577	24.5977	0.183826	-0.00458792	-0.153423	A5_target
APH1A	ENSG00000117362	ENST00000369109	68.2647	74.2861	31.0128	33.4753	128.56	116.272	0.121952	0.110232	-0.144941	A5_target
APH1B	ENSG00000138613	ENST00000261879	1.97184	1.60609	0.920642	0.596952	1.01044	0.714362	-0.295995	-0.625025	-0.50025	non_target
API5	ENSG00000166181	ENST00000531273	73.1113	75.7027	22.6641	20.1098	29.1566	39.2143	0.0502508	-0.172513	0.427558	A5_target
APIP	ENSG00000149089	ENST00000395787	30.1578	31.8171	7.5163	5.06638	20.0752	27.3958	0.0772713	-0.569068	0.448536	non_target
APLF	ENSG00000169621	ENST00000303795	0.355719	0.323427	0.539771	0.287173	0.268626	0.257741	-0.137298	-0.910427	-0.059677	non_target
APLN	ENSG00000171388	ENST00000429967	0.532813	0.311609	0.443116	0.170264	1.27414	0.371119	-0.773893	-1.37991	-1.77957	non_target
APLP1	ENSG00000105290	ENST00000221891	8.34797	7.89825	15.3962	9.90056	13.3478	11.2836	-0.079892	-0.636997	-0.242369	A5_target
APLP2	ENSG00000084234	ENST00000650012	203.113	186.341	233.223	198.991	153.706	168.111	-0.124339	-0.229005	0.129237	non_target
APMAP	ENSG00000101474	ENST00000217456	49.179	50.3612	56.2273	61.574	70.0562	65.1718	0.0342687	0.13105	-0.104264	non_target
APOBEC3B	ENSG00000179750	ENST00000402182	6.48207	5.28045	6.11178	7.73981	5.7283	6.64122	-0.295794	0.340705	0.213342	non_target
APOBEC3C	ENSG00000244509	ENST00000361441	16.5401	15.2278	14.9489	13.8063	23.7208	21.2423	-0.119259	-0.114707	-0.159213	A5_target
APOBEC3D	ENSG00000243811	ENST00000216099	0.369968	0.430181	0.757379	1.41871	0.320833	0.0559695	0.217545	0.90549	-2.51911	non_target
APOBEC3F	ENSG00000128394	ENST00000308521	0.923336	0.945361	0.741418	1.8314	1.12576	0.954912	0.0340086	1.30459	-0.237464	non_target
APOBR	ENSG00000184730	ENST00000564831	0.0377503	0.101897	0.0418602	0.21714	0.0580333	0.0742423	1.43256	2.37498	0.355361	non_target
APOC1	ENSG00000130208	ENST00000592885	15.2828	14.4382	16.0994	12.2093	32.1087	24.2955	-0.0820152	-0.399021	-0.402279	non_target
APOE	ENSG00000130203	ENST00000252486	5.03354	5.30216	13.6136	16.242	7.67513	7.66593	0.075006	0.254681	-0.00172962	non_target
APOL2	ENSG00000128335	ENST00000451256	6.04429	8.75574	10.0535	13.5205	7.33025	8.07334	0.534656	0.427443	0.139304	non_target
APOLD1	ENSG00000178878	ENST00000326765	0.499991	0.327176	0.604829	0.406702	0.0931678	0.148988	-0.611836	-0.572557	0.677289	A5_target
APOM	ENSG00000204444	ENST00000375916	0.470266	0.913943	0.417172	0.721328	0.771134	0.462429	0.958627	0.790013	-0.737749	non_target
APOO	ENSG00000184831	ENST00000379226	15.8842	17.5634	9.90319	9.54024	20.071	21.2651	0.144981	-0.0538681	0.0833696	non_target
APOOL	ENSG00000155008	ENST00000373173	5.12509	4.81801	1.64123	1.73659	1.32445	1.87902	-0.0891396	0.0814755	0.504587	non_target
APP	ENSG00000142192	ENST00000346798	145.047	123.564	196.479	166.533	74.0706	94.2679	-0.231255	-0.238569	0.347864	non_target
APPBP2	ENSG00000062725	ENST00000083182	7.3096	6.34468	3.05634	3.33992	2.05645	2.75369	-0.204243	0.128009	0.421213	non_target
APPL1	ENSG00000157500	ENST00000288266	15.6381	14.1086	5.1002	6.06004	3.40845	3.83858	-0.148493	0.248772	0.171459	A5_target
APPL2	ENSG00000136044	ENST00000551662	9.41254	8.68065	9.20513	8.02091	5.02425	5.91335	-0.116781	-0.198672	0.235066	non_target
APRT	ENSG00000198931	ENST00000378364	133.385	116.956	192.834	150.941	276.161	211.977	-0.189634	-0.35337	-0.381605	non_target
APTX	ENSG00000137074	ENST00000379817	33.3073	33.1084	21.5981	24.4339	34.4694	40.0147	-0.00864197	0.177982	0.215215	A5_target
AQP1	ENSG00000240583	ENST00000311813	0.491246	0.556918	1.14393	1.22445	0.125865	0.289835	0.181019	0.098135	1.20336	non_target
AQP11	ENSG00000178301	ENST00000313578	0.117016	0.126342	0.865036	0.299145	0.55965	0.460262	0.11063	-1.53192	-0.282069	A5_target
AQP3	ENSG00000165272	ENST00000297991	2.0786	2.92178	2.26142	2.55666	3.61746	4.35788	0.491234	0.177036	0.268649	non_target
AQP6	ENSG00000086159	ENST00000315520	0.140673	0.0911308	0.499164	0.755212	0.144171	0.0276658	-0.626336	0.597368	-2.38161	non_target
AQR	ENSG00000021776	ENST00000156471	6.99561	7.78668	6.61599	6.54919	2.54527	3.31484	0.154558	-0.0146397	0.381124	A5_target
AR	ENSG00000169083	ENST00000374690	1.00648	1.13741	2.14284	1.1836	0.446988	0.607023	0.176432	-0.85635	0.441517	A5_target
ARAF	ENSG00000078061	ENST00000290277	20.5519	21.943	28.0827	26.745	32.1657	27.8547	0.0944877	-0.0704128	-0.207598	non_target
ARAP1	ENSG00000186635	ENST00000393609	13.0768	12.7672	35.048	28.9136	17.8217	12.6126	-0.034568	-0.277585	-0.498766	A5_target
ARAP2	ENSG00000047365	ENST00000303965	0.800247	0.946315	0.929628	0.474917	0.126927	0.121784	0.241874	-0.968979	-0.059677	non_target
ARAP3	ENSG00000120318	ENST00000239440	1.26596	1.42565	5.46422	4.80236	1.28349	1.08424	0.171384	-0.186271	-0.243389	A5_target
ARC	ENSG00000198576	ENST00000356613	0.800664	1.17883	2.20613	4.65196	1.44222	0.954328	0.558089	1.07632	-0.59573	A5_target
ARCN1	ENSG00000095139	ENST00000359415	80.6321	72.5327	31.4874	29.1594	39.0023	53.1262	-0.152722	-0.110812	0.445864	A5_target
AREL1	ENSG00000119682	ENST00000356357	14.0321	14.4515	13.7724	12.6162	12.2686	14.1491	0.0424803	-0.126502	0.205744	A5_target
ARF1	ENSG00000143761	ENST00000541182	481.79	481.087	295.47	296.357	710.942	688.906	-0.00210761	0.00432404	-0.045426	A5_target
ARF3	ENSG00000134287	ENST00000256682	49.8949	46.2603	27.8894	30.8358	75.0786	68.3439	-0.109119	0.144886	-0.135588	A5_target
ARF4	ENSG00000168374	ENST00000303436	112.968	109.769	25.7595	21.1524	143.951	153.111	-0.0414368	-0.284281	0.0890058	A5_target
ARF5	ENSG00000004059	ENST00000000233	100.426	89.2602	83.52	70.478	203.714	150.175	-0.170047	-0.244947	-0.439901	non_target
ARF6	ENSG00000165527	ENST00000298316	36.5353	35.6779	25.5613	26.1362	24.1927	26.2637	-0.0342591	0.0320875	0.118503	A5_target
ARFGAP1	ENSG00000101199	ENST00000353546	29.2899	31.6799	85.1423	85.4244	39.3723	30.9061	0.113168	0.00477219	-0.349291	non_target
ARFGAP2	ENSG00000149182	ENST00000524782	36.9617	34.083	48.6563	58.2979	50.7897	41.2442	-0.116977	0.260818	-0.300344	non_target
ARFGAP3	ENSG00000242247	ENST00000263245	17.6837	13.5975	14.6049	12.3751	5.56609	8.28172	-0.379084	-0.239016	0.573266	non_target
ARFGEF1	ENSG00000066777	ENST00000262215	7.89079	6.59827	5.68147	6.86164	1.49314	1.78839	-0.258083	0.27229	0.260313	non_target
ARFGEF2	ENSG00000124198	ENST00000371917	10.0098	11.4665	11.7587	14.9526	2.8916	3.76419	0.196008	0.346665	0.380469	A5_target
ARFGEF3	ENSG00000112379	ENST00000251691	0.712903	1.03496	1.10032	1.75478	0.281391	0.402614	0.537801	0.673368	0.516824	A5_target
ARFIP1	ENSG00000164144	ENST00000353617	9.15394	8.02898	4.66074	3.56449	2.40234	3.55684	-0.189175	-0.386865	0.566158	non_target
ARFIP2	ENSG00000132254	ENST00000614314	26.3147	26.1414	32.1513	31.2574	43.3907	36.6548	-0.00953124	-0.0406797	-0.243381	non_target
ARFRP1	ENSG00000101246	ENST00000622789	8.24329	7.8568	17.7772	18.5302	8.59391	8.41338	-0.0692792	0.0598523	-0.0306284	A5_target
ARG2	ENSG00000081181	ENST00000261783	14.4198	14.2345	8.88778	9.04831	18.4249	19.2988	-0.0186531	0.0258257	0.0668554	non_target
ARGLU1	ENSG00000134884	ENST00000400198	22.0917	24.9324	60.7466	56.558	6.89262	9.22936	0.174519	-0.103072	0.421177	non_target
ARHGAP1	ENSG00000175220	ENST00000311956	18.9319	20.4408	12.0161	14.8753	27.1162	23.6333	0.11063	0.30795	-0.198331	A5_target
ARHGAP10	ENSG00000071205	ENST00000336498	6.76346	6.38083	9.126	8.39344	5.13703	6.11266	-0.0840175	-0.12072	0.250866	A5_target
ARHGAP11A	ENSG00000198826	ENST00000361627	13.1187	14.0459	5.91606	6.77289	2.58412	3.04237	0.0985233	0.195135	0.235521	A5_target
ARHGAP11B	ENSG00000285077	ENST00000428041	0.615505	0.545889	1.70629	0.842953	0.0450578	0.237776	-0.173163	-1.01734	2.39975	non_target
ARHGAP12	ENSG00000165322	ENST00000344936	3.59287	3.49741	2.88607	2.38666	0.681352	0.709381	-0.038851	-0.274118	0.0581595	A5_target
ARHGAP17	ENSG00000140750	ENST00000289968	32.7666	35.9308	31.0656	34.6321	30.8528	35.0801	0.132998	0.156795	0.185252	A5_target
ARHGAP18	ENSG00000146376	ENST00000368149	2.51338	2.18846	1.72615	1.30579	0.515174	0.637804	-0.19971	-0.402632	0.308055	non_target
ARHGAP19	ENSG00000213390	ENST00000358531	11.3719	11.3261	8.08557	8.42878	7.04135	9.61633	-0.00582167	0.0599749	0.449635	non_target
ARHGAP20	ENSG00000137727	ENST00000260283	0.925183	0.78665	1.05156	1.19738	0.320013	0.261557	-0.234018	0.187348	-0.291003	non_target
ARHGAP21	ENSG00000107863	ENST00000396432	15.2148	16.8671	23.9789	22.0509	2.89203	3.90003	0.148741	-0.120927	0.431405	A5_target
ARHGAP22	ENSG00000128805	ENST00000417912	3.68219	3.64709	6.07401	6.76828	5.73859	4.21931	-0.0138174	0.156141	-0.443688	non_target
ARHGAP23	ENSG00000275832	ENST00000622683	0.411696	0.352991	1.66495	1.06796	0.583259	0.321486	-0.221945	-0.640622	-0.859378	A5_target
ARHGAP24	ENSG00000138639	ENST00000395184	0.712492	0.418086	1.40837	1.2473	0.238111	0.258924	-0.769076	-0.175222	0.120895	non_target
ARHGAP26	ENSG00000145819	ENST00000274498	1.31036	1.30786	2.50055	2.48319	0.851048	0.883985	-0.00275188	-0.0100497	0.0547818	non_target
ARHGAP27	ENSG00000159314	ENST00000428638	1.87288	2.35007	6.96005	5.88787	2.05779	1.22778	0.327441	-0.241351	-0.745041	A5_target
ARHGAP28	ENSG00000088756	ENST00000383472	0.997989	1.24589	0.968312	0.239186	0.383551	0.306674	0.320083	-2.01734	-0.322711	non_target
ARHGAP29	ENSG00000137962	ENST00000260526	2.97428	2.98688	1.4008	1.71694	0.606368	0.864833	0.00609934	0.293587	0.512229	non_target
ARHGAP31	ENSG00000031081	ENST00000264245	0.322997	0.249099	0.596937	0.825726	0.39408	0.370549	-0.374797	0.468085	-0.0888233	A5_target
ARHGAP32	ENSG00000134909	ENST00000310343	3.77304	4.21897	6.84483	7.49208	1.12451	1.62189	0.161163	0.130353	0.528385	A5_target
ARHGAP33	ENSG00000004777	ENST00000314737	1.61404	1.50231	6.87107	5.33564	1.29292	1.20404	-0.103495	-0.364873	-0.102746	A5_target
ARHGAP35	ENSG00000160007	ENST00000672722	9.47649	10.2151	16.779	17.8447	6.23786	6.56845	0.108282	0.0888382	0.0745024	A5_target
ARHGAP39	ENSG00000147799	ENST00000377307	5.3455	5.87075	16.3048	14.7423	6.92257	5.73838	0.135222	-0.145334	-0.270665	A5_target
ARHGAP4	ENSG00000089820	ENST00000370028	0.254714	0.504192	2.68323	4.39535	0.108769	0.104362	0.985099	0.71201	-0.059677	non_target
ARHGAP40	ENSG00000124143	ENST00000373345	0.201547	0.272013	0.670471	0.483044	0.284018	0.173415	0.432558	-0.473022	-0.711754	non_target
ARHGAP42	ENSG00000165895	ENST00000298815	1.04431	1.21281	0.895263	1.14417	0.32378	0.30203	0.215812	0.353914	-0.100319	non_target
ARHGAP44	ENSG00000006740	ENST00000379672	4.71017	4.99508	5.16722	6.17065	4.2432	4.73057	0.0847281	0.256034	0.156863	A5_target
ARHGAP5	ENSG00000100852	ENST00000345122	8.83765	10.09	3.19488	3.52062	1.45347	2.03314	0.191195	0.14007	0.48421	A5_target
ARHGAP8	ENSG00000241484	ENST00000389774	3.2779	2.91196	6.5334	5.40975	3.5295	2.93767	-0.170783	-0.272272	-0.264791	A5_target
ARHGAP9	ENSG00000123329	ENST00000670128	0.0870736	0.0940133	0.193107	0.2226	0.0297462	0.0285408	0.11063	0.20505	-0.059677	non_target
ARHGDIA	ENSG00000141522	ENST00000584461	208.665	211.601	145.656	137.233	414.624	304.325	0.0201618	-0.0859359	-0.446191	non_target
ARHGDIG	ENSG00000242173	ENST00000219409	7.79598	6.49336	22.394	13.951	20.0887	11.1705	-0.263766	-0.68274	-0.846683	non_target
ARHGEF1	ENSG00000076928	ENST00000599846	13.8382	12.8229	34.6661	31.386	18.679	16.4909	-0.109931	-0.143404	-0.179753	non_target
ARHGEF10	ENSG00000104728	ENST00000398564	6.12563	6.74076	11.8761	10.4678	2.87794	3.68605	0.138053	-0.182108	0.357037	A5_target
ARHGEF10L	ENSG00000074964	ENST00000361221	1.3309	1.35343	3.63801	3.79801	2.14115	1.56742	0.0242152	0.0620923	-0.449992	A5_target
ARHGEF11	ENSG00000132694	ENST00000368194	13.3403	16.2657	23.9403	30.9964	12.7563	12.9852	0.286038	0.372659	0.0256592	A5_target
ARHGEF12	ENSG00000196914	ENST00000397843	16.9059	18.0213	13.297	12.8913	5.51967	7.70886	0.0921756	-0.0447027	0.481935	A5_target
ARHGEF16	ENSG00000130762	ENST00000378378	2.66312	3.5326	9.73104	7.68348	4.28895	3.34201	0.407612	-0.340835	-0.35991	non_target
ARHGEF17	ENSG00000110237	ENST00000263674	1.77994	1.84606	13.1841	8.23766	1.21313	0.88807	0.0526243	-0.678491	-0.449992	A5_target
ARHGEF18	ENSG00000104880	ENST00000617428	8.62884	8.58954	17.4497	15.2056	13.4695	10.6553	-0.00658569	-0.198601	-0.338124	A5_target
ARHGEF19	ENSG00000142632	ENST00000270747	1.57283	1.53534	3.24922	2.8091	1.81067	1.4195	-0.0348005	-0.209987	-0.35114	A5_target
ARHGEF2	ENSG00000116584	ENST00000673475	14.3846	14.452	28.5433	25.3737	17.4889	15.0233	0.00674878	-0.169817	-0.219238	A5_target
ARHGEF25	ENSG00000240771	ENST00000333972	13.5437	12.9372	37.952	28.9618	18.6815	15.4489	-0.0661003	-0.390022	-0.274104	non_target
ARHGEF26	ENSG00000114790	ENST00000356448	11.0618	11.1785	10.3325	11.8583	3.57416	5.1306	0.0151496	0.198709	0.521524	A5_target
ARHGEF28	ENSG00000214944	ENST00000545377	0.631109	0.6084	0.974749	0.77789	0.10395	0.199476	-0.0528688	-0.325464	0.940323	non_target
ARHGEF3	ENSG00000163947	ENST00000338458	5.07453	4.07737	4.84185	3.5449	3.14461	3.32664	-0.315635	-0.449814	0.0811856	A5_target
ARHGEF37	ENSG00000183111	ENST00000333677	0.289599	0.203242	0.289016	0.388683	0.31164	0.142387	-0.510858	0.427443	-1.13007	non_target
ARHGEF39	ENSG00000137135	ENST00000378387	10.1971	9.56007	10.3579	8.43246	11.6274	10.8692	-0.0930703	-0.296699	-0.0972819	A5_target
ARHGEF4	ENSG00000136002	ENST00000409359	2.77744	2.57643	16.4547	11.2506	2.89995	1.69255	-0.10838	-0.548491	-0.776834	non_target
ARHGEF40	ENSG00000165801	ENST00000298694	2.14979	1.87526	8.80808	6.93965	2.141	1.73177	-0.197104	-0.343966	-0.306033	A5_target
ARHGEF6	ENSG00000129675	ENST00000250617	3.85854	5.21553	2.28629	2.59782	1.44897	2.51984	0.434759	0.184292	0.798304	non_target
ARHGEF7	ENSG00000102606	ENST00000646102	11.9494	13.839	17.0255	15.8115	7.6871	9.90972	0.211802	-0.106718	0.366406	A5_target
ARHGEF9	ENSG00000131089	ENST00000374870	3.60647	3.91054	5.16125	4.78719	2.74841	3.21295	0.116782	-0.108542	0.2253	non_target
ARID1A	ENSG00000117713	ENST00000324856	20.6854	21.7676	39.4296	40.619	12.1702	13.0855	0.0735678	0.0428753	0.104616	A5_target
ARID1B	ENSG00000049618	ENST00000346085	8.20131	8.42614	19.1426	16.2704	3.26305	4.04859	0.0390175	-0.234535	0.311201	A5_target
ARID2	ENSG00000189079	ENST00000334344	6.63467	7.18142	9.87703	11.9708	1.4077	1.69447	0.114246	0.277364	0.267488	A5_target
ARID3A	ENSG00000116017	ENST00000263620	7.35239	8.12027	17.8269	13.8894	7.23922	7.69134	0.143314	-0.360072	0.0874022	A5_target
ARID3B	ENSG00000179361	ENST00000622429	14.5241	16.3373	19.2666	19.4707	19.1208	17.6991	0.169725	0.0152038	-0.111468	A5_target
ARID3C	ENSG00000205143	ENST00000378909	0.102985	0.166789	0.342592	0.197457	0.422182	0.405075	0.695592	-0.79495	-0.059677	non_target
ARID4A	ENSG00000032219	ENST00000355431	3.75937	3.79542	3.92504	4.86774	0.475351	0.288056	0.0137684	0.310543	-0.722642	A5_target
ARID4B	ENSG00000054267	ENST00000264183	11.624	12.512	11.2817	13.3541	1.81497	1.58949	0.106198	0.243303	-0.191383	A5_target
ARID5A	ENSG00000196843	ENST00000357485	5.90711	6.51964	21.7613	25.1688	10.6281	8.03533	0.142339	0.209867	-0.403456	non_target
ARID5B	ENSG00000150347	ENST00000279873	1.82471	2.19707	7.69093	4.68921	0.352476	0.563655	0.267911	-0.713813	0.677289	A5_target
ARIH1	ENSG00000166233	ENST00000379887	6.5602	6.45922	4.69341	5.26674	2.67647	3.12317	-0.022379	0.166272	0.222682	A5_target
ARIH2	ENSG00000177479	ENST00000356401	46.1542	50.9136	36.1037	38.3907	54.1122	57.3697	0.141589	0.0886083	0.0843353	A5_target
ARIH2OS	ENSG00000221883	ENST00000408959	0.716641	0.918836	2.68199	3.60687	1.14759	0.96896	0.358557	0.427443	-0.244102	non_target
ARL1	ENSG00000120805	ENST00000551671	50.1591	51.2556	14.9885	15.6124	29.2081	42.3571	0.0311955	0.0588295	0.536236	non_target
ARL10	ENSG00000175414	ENST00000310389	4.44944	5.33229	6.58337	7.90996	2.17501	2.67848	0.261132	0.264843	0.300394	A5_target
ARL13B	ENSG00000169379	ENST00000394222	6.50677	5.93555	3.35776	3.24852	1.25613	1.41791	-0.13256	-0.0477158	0.174788	A5_target
ARL14EP	ENSG00000152219	ENST00000282032	9.7725	9.63952	5.28445	8.21199	2.78208	4.03368	-0.0197667	0.635979	0.535933	non_target
ARL15	ENSG00000185305	ENST00000504924	8.10805	6.50183	1.04932	2.06179	3.04173	4.03933	-0.318508	0.974437	0.409227	non_target
ARL16	ENSG00000214087	ENST00000397498	31.9081	29.4756	18.4996	21.2504	41.2505	36.883	-0.114402	0.199997	-0.161455	non_target
ARL17A	ENSG00000185829	ENST00000336125	15.0406	18.3158	30.1373	35.8301	3.42133	5.12029	0.284224	0.249619	0.581668	non_target
ARL2	ENSG00000213465	ENST00000246747	73.3408	73.0502	68.9778	69.4998	145.685	122.413	-0.00572879	0.0108777	-0.251098	non_target
ARL2BP	ENSG00000102931	ENST00000219204	40.8582	36.3827	8.62598	7.80603	44.4074	45.3245	-0.167371	-0.144099	0.0294935	A5_target
ARL3	ENSG00000138175	ENST00000260746	8.38209	8.22374	2.4427	3.22143	7.40429	10.6288	-0.0275164	0.399223	0.521553	non_target
ARL4A	ENSG00000122644	ENST00000396663	2.62945	2.91119	1.53199	1.0254	1.57579	1.59958	0.14685	-0.579221	0.0216231	A5_target
ARL4C	ENSG00000188042	ENST00000339728	6.18362	6.29666	4.43437	4.75664	4.17431	5.06107	0.0261336	0.101214	0.277904	A5_target
ARL4D	ENSG00000175906	ENST00000320033	8.20975	8.27639	8.65091	7.65303	12.0397	13.9604	0.0116635	-0.17682	0.213534	non_target
ARL5A	ENSG00000162980	ENST00000295087	10.2521	10.7022	1.99021	2.29416	2.60585	3.89078	0.0619842	0.20505	0.578304	A5_target
ARL5B	ENSG00000165997	ENST00000377275	14.4547	17.2018	1.28404	1.64603	3.19198	4.06388	0.251029	0.358296	0.348408	non_target
ARL6	ENSG00000113966	ENST00000463745	5.58166	6.3947	1.03488	1.16999	0.882898	1.39422	0.196181	0.177036	0.659141	non_target
ARL6IP1	ENSG00000170540	ENST00000304414	132.183	124.739	26.8273	31.3262	72.8389	106.932	-0.0836327	0.223666	0.553913	A5_target
ARL6IP4	ENSG00000182196	ENST00000315580	33.8281	30.6954	80.8153	70.9537	57.9604	46.6215	-0.140202	-0.187752	-0.314074	non_target
ARL6IP5	ENSG00000144746	ENST00000273258	50.7126	45.1216	20.2323	15.9483	27.1898	37.7304	-0.168524	-0.343254	0.47266	A5_target
ARL6IP6	ENSG00000177917	ENST00000326446	11.2529	10.359	9.79002	6.75156	5.33484	10.2122	-0.119416	-0.536091	0.936783	A5_target
ARL8A	ENSG00000143862	ENST00000272217	16.6034	19.5681	21.4721	21.9388	22.8386	22.7	0.23703	0.0310208	-0.00878298	non_target
ARL8B	ENSG00000134108	ENST00000611208	29.9888	33.1307	6.60283	6.62916	14.8135	23.6337	0.143744	0.00574142	0.67393	non_target
ARMC1	ENSG00000104442	ENST00000276569	23.0708	23.0291	6.19063	4.48294	7.16425	9.31385	-0.00261114	-0.465642	0.378561	non_target
ARMC10	ENSG00000170632	ENST00000323716	14.6409	14.6018	5.2889	4.05158	11.9111	14.2485	-0.00385609	-0.384485	0.258499	non_target
ARMC2	ENSG00000118690	ENST00000392644	0.709228	0.724361	0.89272	0.955557	0.550057	0.829351	0.0304596	0.098135	0.5924	non_target
ARMC4	ENSG00000169126	ENST00000305242	1.72828	0.879389	1.05735	1.29501	0.325747	0.644628	-0.974762	0.292513	0.984717	non_target
ARMC5	ENSG00000140691	ENST00000408912	4.83611	3.47393	16.1536	15.5929	6.47361	4.75552	-0.47728	-0.0509638	-0.444967	A5_target
ARMC6	ENSG00000105676	ENST00000535612	35.889	34.887	36.1199	45.168	65.7236	50.9631	-0.0408537	0.322508	-0.366958	A5_target
ARMC7	ENSG00000125449	ENST00000245543	10.4483	10.5266	9.44582	9.44233	16.4032	14.397	0.010766	-0.000533909	-0.18821	non_target
ARMC9	ENSG00000135931	ENST00000611582	3.34321	3.05949	5.48499	6.00497	2.58567	2.8842	-0.127942	0.130668	0.15763	A5_target
ARMCX3	ENSG00000102401	ENST00000341189	10.5731	12.3481	8.00054	8.46207	2.96956	5.33995	0.22389	0.0809139	0.846577	A5_target
ARMCX4	ENSG00000196440	ENST00000423738	0.520612	0.291462	0.855248	0.40667	0.0691647	0.0853226	-0.836903	-1.07248	0.302893	non_target
ARMCX5	ENSG00000125962	ENST00000604957	3.82553	4.79662	4.96044	5.14623	1.23311	2.88201	0.326359	0.0530471	1.22478	non_target
ARMCX6	ENSG00000198960	ENST00000539247	11.2485	11.5037	16.4662	17.0829	12.7837	15.2591	0.0323629	0.0530471	0.255365	non_target
ARMH3	ENSG00000120029	ENST00000370033	10.1276	11.5193	10.7268	9.64211	12.9385	11.6244	0.185749	-0.153804	-0.154517	A5_target
ARMH4	ENSG00000139971	ENST00000267485	1.21219	0.892367	2.12623	1.31	0.7454	0.780213	-0.441911	-0.698734	0.0658539	A5_target
ARMT1	ENSG00000146476	ENST00000367294	16.4827	15.5396	5.23154	5.72519	4.43736	7.89849	-0.0850052	0.130088	0.831876	non_target
ARNT	ENSG00000143437	ENST00000358595	19.3449	19.4592	23.4562	21.2113	16.6176	16.9902	0.00850151	-0.145136	0.0319951	A5_target
ARNT2	ENSG00000172379	ENST00000303329	2.42495	2.9144	2.16577	2.35629	2.66517	2.91324	0.265242	0.121634	0.128395	A5_target
ARNTL	ENSG00000133794	ENST00000673817	2.10661	3.16806	2.72529	3.65441	1.23371	2.34277	0.588677	0.42323	0.925216	non_target
ARNTL2	ENSG00000029153	ENST00000266503	3.9052	3.37315	2.21715	1.79702	1.44083	1.44388	-0.211298	-0.303097	0.00305879	non_target
ARPC1A	ENSG00000241685	ENST00000262942	20.6308	16.2178	10.7361	9.71559	28.1917	22.8229	-0.347221	-0.144099	-0.304789	non_target
ARPC1B	ENSG00000130429	ENST00000451682	2.00325	1.89255	5.9236	4.32103	2.82296	1.84675	-0.0820152	-0.4551	-0.612218	non_target
ARPC2	ENSG00000163466	ENST00000295685	124.687	124.898	61.5156	51.473	124.588	150.367	0.00244404	-0.257138	0.271325	non_target
ARPC3	ENSG00000111229	ENST00000228825	135.583	147.696	35.5725	37.4271	142.909	183.097	0.123454	0.0733195	0.357512	non_target
ARPC4	ENSG00000241553	ENST00000433034	21.4105	19.8622	19.0275	24.0083	40.7171	34.2788	-0.108294	0.335447	-0.248318	non_target
ARPC4-TTLL3	ENSG00000250151	ENST00000397256	3.65709	3.3218	7.98176	7.45709	2.58792	2.0264	-0.13873	-0.0980944	-0.352873	A5_target
ARPC5	ENSG00000162704	ENST00000294742	68.0329	60.8979	22.6901	17.94	63.8544	79.7115	-0.159841	-0.338885	0.320002	A5_target
ARPC5L	ENSG00000136950	ENST00000353214	21.4124	19.9439	15.7025	16.0935	25.1048	26.895	-0.102495	0.0354888	0.099371	A5_target
ARPIN	ENSG00000242498	ENST00000357484	5.49993	4.7058	3.55671	4.01551	5.83004	5.55669	-0.224973	0.175038	-0.069279	A5_target
ARPIN-AP3S2	ENSG00000250021	ENST00000398333	12.0905	10.4559	11.0639	11.2532	15.4588	15.1787	-0.209548	0.024478	-0.0263825	non_target
ARPP19	ENSG00000128989	ENST00000561971	13.9745	15.862	3.97332	6.1832	6.70194	12.5965	0.18278	0.63801	0.91037	non_target
ARRB1	ENSG00000137486	ENST00000420843	5.51996	5.70763	6.58513	5.30116	8.30122	7.10327	0.0482334	-0.312906	-0.224841	A5_target
ARRB2	ENSG00000141480	ENST00000412477	52.7455	48.522	52.8221	49.2156	72.9418	70.5004	-0.120409	-0.102028	-0.0491137	non_target
ARRDC1	ENSG00000197070	ENST00000371421	6.85386	7.6981	23.0552	23.4601	10.9371	10.2225	0.167586	0.0251162	-0.097479	A5_target
ARRDC2	ENSG00000105643	ENST00000222250	8.04176	8.96077	11.5512	13.7178	10.3828	10.0183	0.156113	0.248002	-0.0515491	non_target
ARRDC3	ENSG00000113369	ENST00000265138	2.14436	1.69543	1.42295	1.29495	0.311482	0.448291	-0.338896	-0.135987	0.525286	non_target
ARRDC4	ENSG00000140450	ENST00000268042	5.6738	5.68843	2.42282	1.9595	1.76974	3.30943	0.00371472	-0.306203	0.903042	A5_target
ARSA	ENSG00000100299	ENST00000216124	2.55028	2.84352	15.9326	14.4455	2.22078	1.0654	0.157023	-0.141352	-1.05968	A5_target
ARSB	ENSG00000113273	ENST00000264914	2.8618	2.97839	1.66847	1.92329	3.58304	3.58291	0.0576115	0.20505	-5.29859e-05	non_target
ARSG	ENSG00000141337	ENST00000448504	0.878877	0.799093	1.57298	1.30078	0.884927	0.621639	-0.137298	-0.274118	-0.50948	A5_target
ARSJ	ENSG00000180801	ENST00000315366	0.373189	0.789075	1.00006	0.47702	0.0956169	0.36697	1.08026	-1.06797	1.94032	non_target
ARSK	ENSG00000164291	ENST00000380009	5.25376	4.22565	2.26426	1.6313	1.30795	1.73601	-0.314175	-0.473022	0.408472	non_target
ARSL	ENSG00000157399	ENST00000672027	1.67984	3.05844	3.50632	4.79967	2.66681	3.5952	0.864469	0.452978	0.430958	A5_target
ARV1	ENSG00000173409	ENST00000310256	24.209	23.6491	9.11498	12.301	15.3592	17.5954	-0.03376	0.432461	0.196102	A5_target
ARVCF	ENSG00000099889	ENST00000263207	2.3117	2.47689	9.00119	8.7293	2.64046	1.82201	0.0995747	-0.0442501	-0.535256	A5_target
AS3MT	ENSG00000214435	ENST00000369880	1.63599	1.48249	2.52679	1.79243	1.5569	1.37891	-0.142136	-0.495389	-0.175154	non_target
ASAH1	ENSG00000104763	ENST00000381733	12.252	11.7211	8.84664	8.63168	5.37307	7.56491	-0.0639157	-0.0354895	0.493577	non_target
ASAH2	ENSG00000188611	ENST00000395526	0.53898	0.571159	0.19922	0.0765487	0.132981	0.20611	0.0836629	-1.37991	0.632201	non_target
ASAH2B	ENSG00000204147	ENST00000643851	1.58737	1.43595	0.475726	0.658059	0.293123	0.323432	-0.144627	0.468085	0.141957	non_target
ASAP1	ENSG00000153317	ENST00000518721	13.4481	17.0263	12.6805	13.9009	4.75823	6.12846	0.340364	0.132567	0.3651	A5_target
ASAP2	ENSG00000151693	ENST00000281419	3.67664	4.4062	5.82819	5.52322	1.20422	1.73935	0.261145	-0.077537	0.530447	non_target
ASAP3	ENSG00000088280	ENST00000336689	4.1874	4.42575	11.7552	12.331	5.17879	4.44772	0.0798677	0.0689887	-0.219548	A5_target
ASB1	ENSG00000065802	ENST00000264607	6.60592	6.96419	9.09882	9.95739	7.07887	7.39462	0.0761964	0.130088	0.0629584	A5_target
ASB12	ENSG00000198881	ENST00000362002	0.0564913	0.121987	0.250567	0.216626	0.694751	0.0555499	1.11063	-0.209987	-3.64464	non_target
ASB13	ENSG00000196372	ENST00000357700	18.6773	20.4503	15.7157	14.6476	31.5609	31.3182	0.130836	-0.101541	-0.0111377	non_target
ASB3	ENSG00000115239	ENST00000661334	12.3788	12.533	9.40435	14.1257	10.0088	10.6141	0.0178533	0.586921	0.0847129	A5_target
ASB6	ENSG00000148331	ENST00000277458	16.5136	19.4582	23.0359	26.7131	27.0436	27.5686	0.236727	0.213663	0.0277359	A5_target
ASB7	ENSG00000183475	ENST00000332783	5.15451	4.38715	3.91661	2.75291	2.48683	3.07788	-0.232552	-0.508646	0.307628	A5_target
ASB8	ENSG00000177981	ENST00000536549	9.29646	8.64577	4.92623	4.41669	9.61192	11.0292	-0.104687	-0.15752	0.198428	A5_target
ASCC1	ENSG00000138303	ENST00000342444	16.459	14.5707	9.92962	9.91461	12.021	14.2624	-0.175809	-0.00218239	0.246654	A5_target
ASCC2	ENSG00000100325	ENST00000397771	33.4674	33.7531	42.2279	46.6679	41.5491	35.4277	0.0122648	0.144234	-0.22994	A5_target
ASCC3	ENSG00000112249	ENST00000369162	11.4452	9.51814	10.881	10.2531	2.02581	2.47303	-0.265992	-0.0857544	0.287786	A5_target
ASF1A	ENSG00000111875	ENST00000229595	17.0555	16.4781	3.91292	3.49566	7.80555	9.45555	-0.0496884	-0.162682	0.276662	non_target
ASF1B	ENSG00000105011	ENST00000263382	81.0245	82.4034	43.8892	47.288	127.164	124.512	0.0243456	0.107609	-0.0304124	non_target
ASGR1	ENSG00000141505	ENST00000269299	0.327822	0.471933	2.05991	2.09516	0.335973	0.590991	0.525667	0.024478	0.814792	non_target
ASH1L	ENSG00000116539	ENST00000368346	10.117	10.0045	21.4667	20.547	2.13146	2.02151	-0.0161447	-0.0631747	-0.0764041	A5_target
ASH2L	ENSG00000129691	ENST00000343823	23.4984	22.6964	21.1065	17.401	21.0409	23.1309	-0.0501005	-0.278519	0.136626	non_target
ASIC1	ENSG00000110881	ENST00000228468	9.91356	10.1343	21.9468	19.8839	10.1961	8.52116	0.0317745	-0.142407	-0.258891	A5_target
ASIC3	ENSG00000213199	ENST00000297512	0.916554	1.39444	9.14707	7.18914	0.256184	0.655476	0.605395	-0.347491	1.35536	non_target
ASL	ENSG00000126522	ENST00000304874	7.65914	7.58345	20.1014	16.8014	12.9569	8.84705	-0.0143283	-0.258713	-0.550457	non_target
ASMTL	ENSG00000169093	ENST00000381317	17.677	16.8404	30.6706	24.7218	28.8798	21.302	-0.0699423	-0.311073	-0.439076	non_target
ASNS	ENSG00000070669	ENST00000394308	70.9443	65.517	51.1809	40.393	77.537	75.605	-0.114817	-0.3415	-0.0364026	A5_target
ASNSD1	ENSG00000138381	ENST00000260952	31.1413	28.0461	15.801	13.8883	9.24913	12.5525	-0.15103	-0.186141	0.440588	A5_target
ASPG	ENSG00000166183	ENST00000551177	0.044447	0.0639859	0.492861	0.0568134	0.0911042	0.11655	0.525667	-3.11688	0.355361	non_target
ASPH	ENSG00000198363	ENST00000379454	22.859	20.9343	18.0264	15.3775	4.9816	7.36877	-0.126896	-0.229288	0.564814	A5_target
ASPHD1	ENSG00000174939	ENST00000308748	1.14298	0.893644	2.62226	4.08071	0.969437	1.04642	-0.355034	0.63801	0.110248	A5_target
ASPHD2	ENSG00000128203	ENST00000215906	2.95218	3.50851	3.15584	4.80518	3.98332	4.26049	0.249077	0.606567	0.0970485	A5_target
ASPM	ENSG00000066279	ENST00000367409	17.579	19.5207	16.2636	11.7487	1.0264	0.816358	0.151152	-0.469138	-0.330325	A5_target
ASPSCR1	ENSG00000169696	ENST00000306729	8.05761	8.29939	30.8047	32.9669	14.1318	11.1059	0.0426531	0.0978656	-0.347617	non_target
ASRGL1	ENSG00000162174	ENST00000415229	8.76551	8.17046	8.25137	7.98005	11.7948	11.4409	-0.101421	-0.0482362	-0.0439526	A5_target
ASS1	ENSG00000130707	ENST00000372394	19.4082	20.955	23.8946	16.5542	35.7662	34.8163	0.11063	-0.529489	-0.0388327	A5_target
ASTE1	ENSG00000034533	ENST00000514044	3.48726	4.04295	3.10622	2.84988	3.22242	3.14806	0.213316	-0.124257	-0.0336818	A5_target
ASTN1	ENSG00000152092	ENST00000361833	0.210572	0.0649585	0.289093	0.115354	0.184978	0.108462	-1.69672	-1.32546	-0.77017	non_target
ASTN2	ENSG00000148219	ENST00000313400	0.708658	0.602343	1.50475	1.90802	1.1126	0.726502	-0.234506	0.342554	-0.614892	non_target
ASXL1	ENSG00000171456	ENST00000375687	22.1869	24.3168	54.5395	56.8235	14.7811	15.9686	0.132246	0.0591867	0.111488	non_target
ASXL2	ENSG00000143970	ENST00000435504	5.96593	8.22168	13.2927	13.7564	1.21029	2.07601	0.462685	0.0494672	0.778457	A5_target
ASXL3	ENSG00000141431	ENST00000269197	0.529505	0.479708	0.944846	1.00357	0.112277	0.0718181	-0.142489	0.0869945	-0.644639	non_target
ATAD1	ENSG00000138138	ENST00000308448	15.9346	16.3885	6.49989	6.97994	5.65965	7.82693	0.0405199	0.1028	0.467735	non_target
ATAD2	ENSG00000156802	ENST00000287394	25.0195	19.4625	26.4128	16.9222	3.2928	2.74066	-0.362351	-0.642322	-0.264791	A5_target
ATAD2B	ENSG00000119778	ENST00000238789	4.76457	5.27768	5.79207	5.71803	0.85001	0.919682	0.147556	-0.0185612	0.113655	A5_target
ATAD3A	ENSG00000197785	ENST00000378755	50.6666	54.5568	99.2999	103.923	92.0296	73.5613	0.106723	0.0656472	-0.323152	non_target
ATAD3B	ENSG00000160072	ENST00000673477	30.7397	35.8862	75.726	100.664	50.7822	46.8353	0.22333	0.410689	-0.116728	non_target
ATAD3C	ENSG00000215915	ENST00000378785	0.240804	0.399995	1.15025	2.4861	0.132888	0.200362	0.732118	1.11194	0.5924	A5_target
ATAD5	ENSG00000176208	ENST00000321990	7.41467	9.37737	7.71383	7.14816	0.832478	0.931869	0.3388	-0.109876	0.162715	non_target
ATAT1	ENSG00000137343	ENST00000376485	6.49796	5.81163	10.1091	14.8762	5.51647	5.67441	-0.161043	0.557352	0.0407249	non_target
ATE1	ENSG00000107669	ENST00000224652	7.6801	7.02251	3.60613	4.56515	2.66336	3.39774	-0.129139	0.34021	0.351325	A5_target
ATF1	ENSG00000123268	ENST00000262053	16.3209	17.6857	6.05453	5.68958	4.95718	8.22871	0.115867	-0.089693	0.731146	non_target
ATF2	ENSG00000115966	ENST00000264110	12.737	13.3438	6.44238	6.26182	3.73465	5.37497	0.0671481	-0.0410111	0.525286	A5_target
ATF3	ENSG00000162772	ENST00000341491	17.8198	18.2442	14.1552	19.8068	22.6112	22.2754	0.0339543	0.484668	-0.0215838	A5_target
ATF4	ENSG00000128272	ENST00000337304	299.202	299.7	286.177	246.869	380.177	405.244	0.00239923	-0.213162	0.0921193	non_target
ATF5	ENSG00000169136	ENST00000423777	16.8683	18.9058	9.41174	15.3165	27.7773	28.0896	0.164513	0.70255	0.0161259	non_target
ATF6	ENSG00000118217	ENST00000367942	10.7985	11.1832	9.88104	9.69998	6.86406	8.44204	0.0505089	-0.0266801	0.298529	A5_target
ATF6B	ENSG00000213676	ENST00000375203	28.7824	27.9864	60.6284	56.2309	28.8835	24.1485	-0.0404627	-0.108631	-0.258314	non_target
ATF7	ENSG00000170653	ENST00000548446	3.1399	3.63521	5.11775	3.33652	2.2487	3.53397	0.211324	-0.617163	0.652198	non_target
ATF7-NPFF	ENSG00000267281	ENST00000591834	0.667258	0.480292	0.493269	0.341163	0.547078	0.87485	-0.474333	-0.531915	0.677289	non_target
ATF7IP	ENSG00000171681	ENST00000544627	7.73778	8.91251	9.1697	9.68302	2.01281	2.46851	0.203911	0.0785822	0.294432	A5_target
ATF7IP2	ENSG00000166669	ENST00000396560	0.839755	1.24405	0.822905	1.57265	0.240177	0.230445	0.567008	0.934403	-0.059677	non_target
ATG10	ENSG00000152348	ENST00000282185	1.06334	0.739878	0.471643	0.543675	0.968691	1.13856	-0.523242	0.20505	0.233105	non_target
ATG101	ENSG00000123395	ENST00000336854	23.626	22.0183	20.2968	18.3104	40.8316	37.1228	-0.101674	-0.148587	-0.137379	non_target
ATG12	ENSG00000145782	ENST00000509910	10.559	11.7066	5.53998	5.57083	4.59371	6.82912	0.148849	0.00801338	0.572039	non_target
ATG13	ENSG00000175224	ENST00000528494	22.8637	25.1132	23.6312	21.3642	39.8752	36.7925	0.13539	-0.145499	-0.11608	A5_target
ATG14	ENSG00000126775	ENST00000247178	5.4345	6.31016	7.06981	6.98533	2.78481	3.49296	0.215529	-0.0173422	0.326872	A5_target
ATG16L1	ENSG00000085978	ENST00000392018	14.3884	16.0716	23.3813	27.0075	14.3476	13.7449	0.159612	0.208004	-0.0619051	non_target
ATG16L2	ENSG00000168010	ENST00000321297	1.63886	1.66114	11.2746	8.72133	1.81671	1.51288	0.019482	-0.370452	-0.264035	non_target
ATG2A	ENSG00000110046	ENST00000377264	9.07426	10.776	23.692	25.2397	12.7598	10.7611	0.24797	0.0912931	-0.245773	A5_target
ATG2B	ENSG00000066739	ENST00000359933	5.08994	5.88311	6.74155	7.11083	0.757951	1.15503	0.208932	0.0769362	0.607748	A5_target
ATG3	ENSG00000144848	ENST00000283290	60.8018	62.7399	25.7133	25.7311	31.8117	42.4624	0.0452683	0.00100038	0.416628	non_target
ATG4A	ENSG00000101844	ENST00000372232	8.3747	9.32254	2.95152	4.73002	3.22691	5.23474	0.154685	0.680388	0.697962	A5_target
ATG4B	ENSG00000168397	ENST00000404914	25.6665	26.6622	46.6498	47.0036	36.9	34.7757	0.0549092	0.0109	-0.0855417	A5_target
ATG4C	ENSG00000125703	ENST00000317868	10.5757	8.37364	1.72537	2.05103	2.74081	2.86882	-0.336829	0.249444	0.0658539	A5_target
ATG4D	ENSG00000130734	ENST00000309469	17.137	15.7471	26.3613	27.9639	24.8126	20.8313	-0.122031	0.0851408	-0.252322	non_target
ATG5	ENSG00000057663	ENST00000369076	12.2474	11.0884	5.18315	4.30872	4.53713	5.96642	-0.143432	-0.266571	0.395087	non_target
ATG7	ENSG00000197548	ENST00000354449	5.93207	5.48542	8.22639	8.91086	8.69776	7.4086	-0.112933	0.115305	-0.231443	non_target
ATG9A	ENSG00000198925	ENST00000409618	36.9876	39.4171	45.0371	50.3925	58.4099	49.5557	0.09178	0.162096	-0.237162	non_target
ATG9B	ENSG00000181652	ENST00000639579	0.220763	0.187281	0.629481	0.36281	0.177769	0.124048	-0.237293	-0.79495	-0.519109	non_target
ATIC	ENSG00000138363	ENST00000236959	131.716	125.324	105.045	116.216	166.981	163.106	-0.0717722	0.145811	-0.0338769	non_target
ATL1	ENSG00000198513	ENST00000358385	0.934689	0.733951	0.628152	1.19474	0.435422	0.752001	-0.348802	0.927516	0.78832	non_target
ATL2	ENSG00000119787	ENST00000378954	24.8677	24.6968	14.1421	11.1806	7.32577	9.91448	-0.00994903	-0.339004	0.436557	A5_target
ATL3	ENSG00000184743	ENST00000398868	4.02535	3.70769	2.73798	2.74505	2.92396	2.40761	-0.118596	0.00371942	-0.280322	non_target
ATM	ENSG00000149311	ENST00000278616	6.35335	8.03532	7.17183	6.9728	0.669544	0.572818	0.338839	-0.0406021	-0.225101	non_target
ATMIN	ENSG00000166454	ENST00000299575	14.8252	14.8352	5.88627	6.91646	11.1812	11.7519	0.000967877	0.232681	0.0718205	A5_target
ATN1	ENSG00000111676	ENST00000396684	24.1575	30.2903	50.6045	58.8974	32.1841	28.7245	0.326384	0.218939	-0.164066	A5_target
ATOH1	ENSG00000172238	ENST00000306011	0.129313	0.104714	0.286782	0.123968	0.0331319	0.0635788	-0.304408	-1.20999	0.940323	non_target
ATOX1	ENSG00000177556	ENST00000521264	3.11624	3.63163	3.32753	4.93165	4.56245	4.50728	0.220813	0.56762	-0.0175515	non_target
ATP10D	ENSG00000145246	ENST00000273859	1.41689	1.39074	1.7854	1.52298	0.759063	0.802191	-0.0268736	-0.229353	0.0797261	A5_target
ATP11A	ENSG00000068650	ENST00000375630	6.75092	8.42594	12.908	11.8952	2.9616	4.30253	0.319753	-0.11789	0.538807	A5_target
ATP11B	ENSG00000058063	ENST00000323116	6.46763	6.96197	3.94936	3.56449	1.57438	1.8281	0.106258	-0.147926	0.215558	non_target
ATP11C	ENSG00000101974	ENST00000327569	13.1444	13.1684	5.42525	4.21909	3.03493	2.50911	0.00262727	-0.362758	-0.274486	non_target
ATP12A	ENSG00000075673	ENST00000218548	0.172607	0.124243	0.0850665	0.147088	0.0982772	0.0754359	-0.474333	0.790013	-0.381605	non_target
ATP13A1	ENSG00000105726	ENST00000357324	30.627	32.325	98.317	101.115	31.4838	23.6434	0.0778501	0.040486	-0.413168	non_target
ATP13A2	ENSG00000159363	ENST00000326735	21.2073	19.4551	27.7268	28.779	34.8046	25.0457	-0.124409	0.0537359	-0.474714	non_target
ATP13A3	ENSG00000133657	ENST00000642744	15.6138	18.7919	6.34571	5.52562	3.68142	4.41277	0.267285	-0.199645	0.261424	non_target
ATP1A1	ENSG00000163399	ENST00000537345	330.559	310.307	441.992	425.666	361.644	351.815	-0.0912115	-0.0542989	-0.0397518	non_target
ATP1A3	ENSG00000105409	ENST00000545399	20.3005	18.3612	21.1762	22.7713	30.6316	22.0767	-0.144853	0.104769	-0.472494	A5_target
ATP1B1	ENSG00000143153	ENST00000367816	12.7616	11.3489	9.00791	9.15586	6.86288	9.20252	-0.169256	0.0235029	0.423214	A5_target
ATP1B2	ENSG00000129244	ENST00000250111	2.39938	2.56748	3.65834	1.56086	2.96402	2.46473	0.0976909	-1.22885	-0.266128	non_target
ATP1B3	ENSG00000069849	ENST00000286371	130.438	123.387	63.3389	76.3807	134.635	126.969	-0.0801794	0.270116	-0.0845738	A5_target
ATP23	ENSG00000166896	ENST00000300145	2.398	2.31788	1.41817	0.350307	1.35754	2.02117	-0.0490267	-2.01734	0.574195	non_target
ATP2A1	ENSG00000196296	ENST00000357084	0.749789	0.897066	2.56168	3.34145	0.498442	0.438391	0.258729	0.383387	-0.185208	non_target
ATP2A2	ENSG00000174437	ENST00000539276	78.9088	82.3657	88.9064	89.3378	55.3759	63.2544	0.0618563	0.00698298	0.191908	A5_target
ATP2A3	ENSG00000074370	ENST00000359983	2.61062	2.63077	6.36866	3.50381	3.74574	3.27307	0.0110942	-0.862064	-0.194607	A5_target
ATP2B1	ENSG00000070961	ENST00000428670	17.2626	17.6933	11.5574	8.82099	2.8165	3.0827	0.0355544	-0.389808	0.130294	A5_target
ATP2B4	ENSG00000058668	ENST00000357681	4.54923	4.67052	7.39862	5.60071	2.31481	2.54278	0.0379609	-0.401647	0.135515	A5_target
ATP2C1	ENSG00000017260	ENST00000507488	23.1982	22.1537	16.5431	12.04	11.0882	13.8246	-0.0664642	-0.458398	0.318219	A5_target
ATP5F1A	ENSG00000152234	ENST00000398752	85.0421	77.4533	66.4859	61.1723	88.4425	91.5781	-0.13485	-0.12017	0.0502616	A5_target
ATP5F1B	ENSG00000110955	ENST00000262030	649.542	593.629	366.65	326.581	978.458	890.235	-0.129861	-0.16696	-0.136324	non_target
ATP5F1C	ENSG00000165629	ENST00000356708	197.886	165.297	100.632	93.4828	181.82	204.049	-0.259611	-0.106324	0.166411	A5_target
ATP5F1D	ENSG00000099624	ENST00000215375	53.591	56.2311	126.03	111.717	117.735	86.7923	0.0693792	-0.173918	-0.439906	non_target
ATP5F1E	ENSG00000124172	ENST00000243997	26.5083	24.1042	13.5869	9.1235	23.0832	27.0024	-0.137163	-0.57456	0.226246	non_target
ATP5IF1	ENSG00000130770	ENST00000335514	174.169	157.631	259.402	199.165	207.812	206.947	-0.143943	-0.381229	-0.00601684	non_target
ATP5MC1	ENSG00000159199	ENST00000393366	139.16	129.077	67.0811	58.2071	255.15	210.165	-0.108512	-0.204712	-0.279824	non_target
ATP5MC2	ENSG00000135390	ENST00000673498	176.259	166.186	88.8529	72.2153	317.636	261.919	-0.0848965	-0.299113	-0.278255	non_target
ATP5MC3	ENSG00000154518	ENST00000284727	43.7617	37.4558	22.7507	22.5218	65.3954	60.5124	-0.224481	-0.0145916	-0.111959	A5_target
ATP5MD	ENSG00000173915	ENST00000369825	24.1828	20.1521	9.89838	5.91252	23.7029	27.6101	-0.263049	-0.743419	0.220133	non_target
ATP5ME	ENSG00000169020	ENST00000304312	137.007	109.415	155.591	126.816	174.549	172.586	-0.324445	-0.295023	-0.016314	non_target
ATP5MF	ENSG00000241468	ENST00000449683	239.308	208.821	201.523	226.136	375.86	363.078	-0.196599	0.166242	-0.0499166	non_target
ATP5MF-PTCD1	ENSG00000248919	ENST00000413834	1.63779	1.7373	3.18615	3.96658	2.14968	2.65591	0.0850948	0.316082	0.305087	A5_target
ATP5MG	ENSG00000167283	ENST00000300688	131.529	127.259	74.4818	72.9623	199.777	204.239	-0.0476119	-0.0297377	0.0318663	non_target
ATP5MPL	ENSG00000156411	ENST00000554713	41.6729	40.8308	19.9543	18.4188	51.0289	64.1285	-0.0294521	-0.115523	0.32965	non_target
ATP5PB	ENSG00000116459	ENST00000369722	120.653	108.038	48.1397	45.7442	106.151	117.169	-0.159325	-0.0736361	0.142468	non_target
ATP5PD	ENSG00000167863	ENST00000301587	130.221	113.571	47.9591	36.9559	163.33	159.37	-0.197368	-0.375997	-0.0354117	non_target
ATP5PF	ENSG00000154723	ENST00000400099	120.309	100.525	22.5841	25.6614	125.09	139.619	-0.259186	0.184292	0.158533	non_target
ATP5PO	ENSG00000241837	ENST00000290299	283.268	249.112	91.965	72.6099	335.721	360.287	-0.185374	-0.340918	0.101885	non_target
ATP6AP1	ENSG00000071553	ENST00000369762	93.8762	88.4908	79.9853	76.567	148.53	132.3	-0.0852319	-0.063011	-0.166939	non_target
ATP6AP1L	ENSG00000205464	ENST00000439350	0.377702	0.509756	1.46588	1.81046	0.193546	0.0928519	0.432558	0.304586	-1.05968	non_target
ATP6AP2	ENSG00000182220	ENST00000636580	33.2652	31.401	18.8329	14.4455	15.5084	23.7954	-0.0832024	-0.382627	0.617634	non_target
ATP6V0A1	ENSG00000033627	ENST00000264649	38.9741	41.9299	54.8424	61.905	37.4623	37.7595	0.105464	0.174763	0.0113995	A5_target
ATP6V0A2	ENSG00000185344	ENST00000330342	10.1526	9.10911	8.48924	9.57487	5.32091	6.94407	-0.156474	0.173618	0.384109	A5_target
ATP6V0B	ENSG00000117410	ENST00000532642	48.3393	51.2288	42.3919	57.1735	113.318	94.441	0.0837586	0.431559	-0.262891	non_target
ATP6V0C	ENSG00000185883	ENST00000330398	74.0629	86.1876	16.2655	18.0801	154.225	124.923	0.218729	0.152583	-0.303999	non_target
ATP6V0D1	ENSG00000159720	ENST00000540149	67.9447	69.8695	41.5073	54.5886	118.343	112.265	0.0403008	0.395234	-0.0760674	non_target
ATP6V0D2	ENSG00000147614	ENST00000285393	1.41941	3.29332	0.267906	1.73712	1.02139	3.29636	1.21425	2.6969	1.69034	non_target
ATP6V0E1	ENSG00000113732	ENST00000519374	54.6266	57.4555	18.01	18.7619	78.3684	84.8152	0.0728397	0.0590087	0.11405	non_target
ATP6V0E2	ENSG00000171130	ENST00000421974	19.3979	18.8377	14.868	16.0149	36.3814	30.6924	-0.0422817	0.107203	-0.24532	non_target
ATP6V1A	ENSG00000114573	ENST00000273398	25.0315	27.8204	12.7681	15.838	9.70038	15.6147	0.152399	0.310845	0.686796	non_target
ATP6V1B1	ENSG00000116039	ENST00000234396	0.938313	0.972572	3.82893	4.74953	0.230794	0.184535	0.0517362	0.310845	-0.322711	non_target
ATP6V1B2	ENSG00000147416	ENST00000276390	34.3086	33.5795	21.6759	22.4877	33.0813	35.1169	-0.0309894	0.0530471	0.0861524	A5_target
ATP6V1C1	ENSG00000155097	ENST00000518738	18.2524	20.2146	4.3099	3.89658	5.54549	7.76884	0.147306	-0.145447	0.486384	A5_target
ATP6V1C2	ENSG00000143882	ENST00000635370	0.771081	0.783564	1.3077	1.91326	0.418369	0.535222	0.0231671	0.549005	0.355361	non_target
ATP6V1D	ENSG00000100554	ENST00000216442	29.5429	31.5109	11.5154	9.269	20.3226	30.8553	0.0930359	-0.313081	0.602431	A5_target
ATP6V1E1	ENSG00000131100	ENST00000253413	76.9976	78.4384	30.2464	28.2084	64.4393	81.892	0.0267467	-0.10064	0.345781	non_target
ATP6V1E2	ENSG00000250565	ENST00000306448	1.59135	0.976237	2.24586	0.970823	1.63091	1.38701	-0.704946	-1.20999	-0.233706	A5_target
ATP6V1F	ENSG00000128524	ENST00000492758	111.137	107.821	77.4694	66.0107	200.254	188.674	-0.0436982	-0.230927	-0.085929	non_target
ATP6V1FNB	ENSG00000272899	ENST00000609480	0.147462	0.218921	0.490551	0.353419	0.132238	0.090628	0.570062	-0.473022	-0.545104	non_target
ATP6V1G1	ENSG00000136888	ENST00000374050	75.8332	80.4927	33.8186	32.3107	69.5996	94.6978	0.0860279	-0.0658037	0.444253	non_target
ATP6V1G2	ENSG00000213760	ENST00000303892	0.676082	0.535308	0.799668	0.345674	0.415735	0.886419	-0.336829	-1.20999	1.09233	non_target
ATP6V1H	ENSG00000047249	ENST00000359530	19.1766	19.7207	13.0282	14.2411	15.3282	19.7202	0.0403676	0.128429	0.363479	A5_target
ATP7A	ENSG00000165240	ENST00000341514	1.91326	1.67444	1.27107	1.13122	0.509643	0.389536	-0.192357	-0.168167	-0.387731	A5_target
ATP7B	ENSG00000123191	ENST00000242839	8.73257	8.29244	14.122	14.0186	7.33763	6.53895	-0.0746095	-0.0105992	-0.166256	A5_target
ATP8A1	ENSG00000124406	ENST00000381668	1.52323	1.55119	2.26489	1.82534	0.257227	0.221273	0.0262377	-0.311271	-0.217218	non_target
ATP8A2	ENSG00000132932	ENST00000381655	0.0518012	0.0639197	0.114882	0.283773	0.0379208	0.0800454	0.303275	1.30459	1.07783	non_target
ATP8B1	ENSG00000081923	ENST00000648908	0.11623	0.0627468	0.180438	0.401135	0.023824	0.0228586	-0.88937	1.15258	-0.059677	non_target
ATP8B2	ENSG00000143515	ENST00000672630	18.2083	17.6012	28.1857	25.0238	18.4732	15.093	-0.0489237	-0.171659	-0.291555	A5_target
ATP8B3	ENSG00000130270	ENST00000310127	0.463584	0.394358	1.86929	1.99317	0.547096	0.276278	-0.233324	0.0925755	-0.985676	non_target
ATP9A	ENSG00000054793	ENST00000338821	6.17241	5.52414	5.12827	5.0271	5.35554	4.88787	-0.160085	-0.028747	-0.131827	non_target
ATP9B	ENSG00000166377	ENST00000426216	2.46186	2.56947	5.023	6.67125	1.95118	2.0335	0.0617203	0.409409	0.059622	A5_target
ATPAF1	ENSG00000123472	ENST00000576409	25.373	21.3549	10.8419	6.66691	21.3288	24.0869	-0.248728	-0.701523	0.175444	non_target
ATPAF2	ENSG00000171953	ENST00000474627	16.776	14.4805	21.4644	25.9797	27.9624	23.5663	-0.212289	0.27544	-0.246763	non_target
ATPSCKMT	ENSG00000150756	ENST00000511437	5.39981	4.22688	2.93398	3.62365	2.46266	3.53103	-0.353317	0.304586	0.519872	non_target
ATR	ENSG00000175054	ENST00000350721	5.55365	5.78787	7.99702	6.12316	0.890176	0.879987	0.0595968	-0.385187	-0.0166082	non_target
ATRAID	ENSG00000138085	ENST00000611786	53.6239	47.1918	40.4418	47.4196	98.5258	77.6104	-0.184338	0.229636	-0.344251	non_target
ATRIP	ENSG00000164053	ENST00000320211	8.80604	8.9168	15.4363	17.394	8.92881	8.95152	0.0180329	0.17226	0.00366486	A5_target
ATRN	ENSG00000088812	ENST00000262919	10.4578	11.0858	13.6697	11.8022	6.38488	7.63126	0.0841366	-0.211925	0.257261	A5_target
ATRNL1	ENSG00000107518	ENST00000355044	0.55649	0.503647	0.81672	0.721782	0.301938	0.466744	-0.143943	-0.178278	0.628379	A5_target
ATRX	ENSG00000085224	ENST00000373344	5.97362	6.52584	9.01204	5.89878	0.479524	0.535725	0.127558	-0.611436	0.159889	A5_target
ATXN1	ENSG00000124788	ENST00000244769	2.2886	2.85732	4.76112	4.97051	0.906375	1.24804	0.320198	0.0620923	0.461489	A5_target
ATXN10	ENSG00000130638	ENST00000252934	30.3116	27.8242	20.9621	16.9979	25.8988	28.1399	-0.123531	-0.302434	0.119727	A5_target
ATXN1L	ENSG00000224470	ENST00000427980	9.91673	13.0266	11.2979	13.5217	8.61186	11.5342	0.393528	0.259213	0.421519	A5_target
ATXN2	ENSG00000204842	ENST00000550104	17.0005	20.1012	28.0039	34.072	7.92249	9.46398	0.241704	0.28296	0.256492	A5_target
ATXN2L	ENSG00000168488	ENST00000395547	55.1596	65.8647	123.128	140.094	63.1092	62.479	0.255893	0.18624	-0.0144789	non_target
ATXN3	ENSG00000066427	ENST00000545170	2.18328	2.16826	0.913577	1.30322	0.633273	0.729134	-0.00996022	0.512479	0.203357	non_target
ATXN7	ENSG00000285258	ENST00000295900	0.079263	0.17116	0.219732	0.417929	0.0203084	0.038971	1.11063	0.927516	0.940323	non_target
ATXN7L1	ENSG00000146776	ENST00000419735	1.92909	2.36816	3.86799	4.86407	0.934361	0.94847	0.295845	0.330581	0.0216231	A5_target
ATXN7L2	ENSG00000162650	ENST00000369870	8.52224	8.56803	21.9132	19.537	8.10123	7.13533	0.00773001	-0.165593	-0.18316	A5_target
ATXN7L3	ENSG00000087152	ENST00000454077	29.5603	28.5162	40.0102	33.8115	43.5169	35.6603	-0.0518776	-0.242852	-0.287256	A5_target
ATXN7L3B	ENSG00000253719	ENST00000519948	22.9442	25.6172	8.75587	10.5147	25.7937	31.3641	0.158986	0.264082	0.282099	A5_target
AUH	ENSG00000148090	ENST00000375731	5.76408	4.90038	7.44852	6.96171	2.23272	2.85633	-0.234199	-0.0975125	0.355361	non_target
AUNIP	ENSG00000127423	ENST00000538789	19.2305	20.6521	24.061	27.9986	22.1327	24.9774	0.102894	0.218661	0.174445	non_target
AUP1	ENSG00000115307	ENST00000377526	103.238	115.07	177.569	207.826	153.852	151.142	0.156541	0.226996	-0.0256419	non_target
AURKA	ENSG00000087586	ENST00000347343	27.6683	27.2264	24.3609	22.7093	26.4636	29.4614	-0.0232258	-0.101281	0.154816	A5_target
AURKAIP1	ENSG00000175756	ENST00000338370	55.4836	54.0664	108.685	118.542	111.194	94.8052	-0.037328	0.125245	-0.230046	non_target
AURKB	ENSG00000178999	ENST00000316199	93.8916	94.2877	147.089	139.64	118.689	112.925	0.00607399	-0.074969	-0.0718155	non_target
AURKC	ENSG00000105146	ENST00000302804	0.16684	0.120092	0.493346	0.21326	0.455969	0.32812	-0.474333	-1.20999	-0.474714	non_target
AUTS2	ENSG00000158321	ENST00000342771	8.91207	9.27058	19.5097	18.7779	5.36234	5.89891	0.0568979	-0.0551581	0.137585	A5_target
AVEN	ENSG00000169857	ENST00000306730	3.85705	4.11713	6.80428	5.71453	6.1091	6.33565	0.0941418	-0.251807	0.0525325	A5_target
AVL9	ENSG00000105778	ENST00000318709	8.96346	9.7442	4.29379	4.87101	3.895	5.39925	0.120489	0.181967	0.471137	A5_target
AVPI1	ENSG00000119986	ENST00000370626	8.38072	8.99246	11.0825	10.9786	14.9909	14.537	0.101641	-0.0135901	-0.0443562	A5_target
AXIN1	ENSG00000103126	ENST00000262320	17.3385	19.0122	26.42	30.9486	27.0106	24.0934	0.132948	0.228245	-0.164886	non_target
AXIN2	ENSG00000168646	ENST00000307078	3.84755	2.86621	5.9991	7.08714	2.8584	2.16432	-0.424793	0.240456	-0.401293	A5_target
AXL	ENSG00000167601	ENST00000301178	0.0910424	0.0655323	0.370166	0.232746	0.046653	0.0447626	-0.474333	-0.669419	-0.059677	non_target
AZI2	ENSG00000163512	ENST00000479665	5.73831	5.24788	2.63175	2.99213	2.03252	3.03714	-0.128893	0.185151	0.579441	non_target
AZIN1	ENSG00000155096	ENST00000337198	32.6827	33.5379	9.83576	11.774	21.4328	26.737	0.0372633	0.259498	0.319016	A5_target
AZIN2	ENSG00000142920	ENST00000373441	3.22408	2.4635	3.7401	5.13553	3.76175	3.12157	-0.388176	0.457437	-0.26913	non_target
B2M	ENSG00000166710	ENST00000648006	139.987	140.994	47.3833	43.5868	132.694	174.673	0.0103391	-0.120489	0.396548	A5_target
B3GALNT2	ENSG00000162885	ENST00000366600	17.9126	15.8193	8.40931	9.82934	6.35767	8.11351	-0.179284	0.225108	0.351829	A5_target
B3GALT4	ENSG00000235863	ENST00000451237	0.168114	0.317647	1.39813	1.45049	0.559955	0.619921	0.917985	0.0530471	0.146774	non_target
B3GALT6	ENSG00000176022	ENST00000379198	11.9929	11.0753	24.8429	22.7987	20.0318	17.7397	-0.114835	-0.123878	-0.175311	non_target
B3GAT1	ENSG00000109956	ENST00000524765	0.823412	0.700454	3.20954	2.82264	0.703238	0.392577	-0.233324	-0.185325	-0.841037	non_target
B3GAT2	ENSG00000112309	ENST00000230053	0.412909	0.328497	0.144588	0.125003	0.122498	0.128219	-0.329943	-0.209987	0.0658539	non_target
B3GAT3	ENSG00000149541	ENST00000265471	22.5765	21.5019	45.6962	52.1711	35.9698	31.1677	-0.0703624	0.191178	-0.206735	A5_target
B3GLCT	ENSG00000187676	ENST00000343307	9.52629	8.25042	4.70742	4.29768	3.32399	4.55853	-0.207446	-0.131377	0.455651	A5_target
B3GNT10	ENSG00000214654	ENST00000464488	2.15456	1.8145	0.860088	0.330482	1.36904	1.77967	-0.247824	-1.37991	0.378444	A5_target
B3GNT2	ENSG00000170340	ENST00000301998	5.49576	4.56229	3.56447	2.98224	2.92247	3.72174	-0.268562	-0.257293	0.348788	A5_target
B3GNT3	ENSG00000179913	ENST00000318683	0.425406	0.37319	0.412756	0.203912	0.326987	0.183013	-0.18893	-1.01734	-0.837285	non_target
B3GNT4	ENSG00000176383	ENST00000324189	0.668458	0.481156	1.20794	1.32913	0.837318	0.559937	-0.474333	0.137936	-0.580509	non_target
B3GNT5	ENSG00000176597	ENST00000326505	5.08757	6.2079	0.966006	1.069	1.30352	1.57622	0.287128	0.146157	0.27406	A5_target
B3GNT7	ENSG00000156966	ENST00000287590	0.080898	0.0436728	0.224264	0.232664	0.145091	0.0994373	-0.88937	0.0530471	-0.545104	non_target
B3GNT8	ENSG00000177191	ENST00000321702	0.267354	0.247425	0.76233	0.14646	0.469717	0.450683	-0.111762	-2.37991	-0.059677	non_target
B3GNT9	ENSG00000237172	ENST00000449549	0.291384	0.314607	1.17494	1.62526	0.271481	0.416768	0.11063	0.468085	0.618395	A5_target
B3GNTL1	ENSG00000175711	ENST00000320865	1.24207	1.95572	3.09893	3.77067	1.69727	1.67939	0.65495	0.283053	-0.0152828	non_target
B4GALNT1	ENSG00000135454	ENST00000341156	9.26682	9.29996	16.3229	15.9014	10.1395	8.61415	0.00515111	-0.037741	-0.235203	non_target
B4GALNT3	ENSG00000139044	ENST00000266383	8.10474	9.28529	22.28	20.3363	9.54818	7.21371	0.196181	-0.131689	-0.404485	non_target
B4GALNT4	ENSG00000182272	ENST00000329962	3.09202	3.91547	23.5773	15.5896	3.50144	3.47216	0.340636	-0.596811	-0.0121113	A5_target
B4GALT1	ENSG00000086062	ENST00000379731	22.1317	20.9339	13.7537	12.544	26.8203	25.4487	-0.080271	-0.132819	-0.0757333	A5_target
B4GALT2	ENSG00000117411	ENST00000309519	38.5017	38.7937	39.9211	33.144	72.4024	57.1061	0.010903	-0.268404	-0.342392	non_target
B4GALT3	ENSG00000158850	ENST00000622395	40.5905	37.1989	34.1929	32.8585	58.0391	53.3257	-0.125882	-0.0574294	-0.122195	non_target
B4GALT4	ENSG00000121578	ENST00000483209	8.5809	8.67607	6.81016	5.83267	3.88241	6.18027	0.0159113	-0.223534	0.670716	non_target
B4GALT5	ENSG00000158470	ENST00000371711	17.7042	21.4882	8.00057	9.1256	17.8337	26.4118	0.279457	0.189816	0.566579	A5_target
B4GALT6	ENSG00000118276	ENST00000306851	3.2375	3.31678	1.38704	1.62239	0.527863	0.97677	0.0349026	0.226112	0.887856	A5_target
B4GALT7	ENSG00000027847	ENST00000029410	17.1138	16.6573	26.5492	31.5199	27.0866	23.2533	-0.0390062	0.247596	-0.220142	A5_target
B4GAT1	ENSG00000174684	ENST00000311181	36.1974	32.883	52.9904	44.3083	65.094	49.2707	-0.138542	-0.258155	-0.401794	non_target
B9D1	ENSG00000108641	ENST00000663089	7.05461	6.68419	16.7857	14.8274	7.27217	6.24941	-0.0778152	-0.17896	-0.218666	non_target
B9D2	ENSG00000123810	ENST00000243578	3.48277	3.91383	4.72892	3.81581	4.66203	6.56989	0.168345	-0.309523	0.494912	non_target
BAAT	ENSG00000136881	ENST00000259407	0.127168	0.11442	0.517049	0.568925	0.0434433	0.104207	-0.152404	0.137936	1.26225	non_target
BABAM1	ENSG00000105393	ENST00000359435	60.7313	56.3317	69.9853	78.3121	98.8187	83.4348	-0.108493	0.162184	-0.244135	non_target
BABAM2	ENSG00000158019	ENST00000344773	25.3525	23.7428	22.9702	16.0055	40.5586	35.2669	-0.0946372	-0.521189	-0.201696	non_target
BACE1	ENSG00000186318	ENST00000313005	3.12276	3.04181	4.84282	5.16304	3.03806	2.88158	-0.0378926	0.0923735	-0.0762917	A5_target
BACE2	ENSG00000182240	ENST00000330333	5.44725	4.19455	4.03922	3.29986	6.60161	4.98677	-0.377011	-0.291671	-0.404711	A5_target
BACH1	ENSG00000156273	ENST00000399921	5.93042	6.57722	4.09974	5.47123	1.28424	1.8666	0.149342	0.416334	0.539499	A5_target
BACH2	ENSG00000112182	ENST00000257749	1.25828	1.24955	1.61921	1.87643	0.445776	0.74086	-0.0100516	0.212704	0.732881	A5_target
BAD	ENSG00000002330	ENST00000394532	11.7538	13.2249	26.2042	25.6199	27.0085	21.8992	0.170131	-0.0325286	-0.302533	non_target
BAG1	ENSG00000107262	ENST00000634734	15.2892	14.4241	15.5825	15.5914	21.8718	20.7276	-0.0840372	0.000817171	-0.0775197	A5_target
BAG2	ENSG00000112208	ENST00000370693	5.98337	5.87929	2.81621	3.01248	2.3161	3.25929	-0.0253176	0.0971942	0.492864	A5_target
BAG3	ENSG00000151929	ENST00000369085	30.8736	31.14	44.8234	44.1963	33.3246	33.2883	0.0123946	-0.0203261	-0.00157401	A5_target
BAG4	ENSG00000156735	ENST00000287322	13.8476	14.9881	7.2616	8.9592	4.17718	5.5004	0.114179	0.303082	0.397008	A5_target
BAG5	ENSG00000166170	ENST00000337322	12.5621	16.7963	11.0952	16.944	4.52849	7.97181	0.419075	0.610844	0.815876	A5_target
BAG6	ENSG00000204463	ENST00000375964	77.8408	76.4687	112.882	119.139	123.154	102.021	-0.0256571	0.0778264	-0.271596	non_target
BAHCC1	ENSG00000266074	ENST00000584436	6.93811	7.8345	31.494	28.2063	4.8287	4.39193	0.175299	-0.159059	-0.136778	A5_target
BAHD1	ENSG00000140320	ENST00000416165	10.5887	10.9636	18.1686	17.5166	15.0423	13.2546	0.050205	-0.0527189	-0.182534	non_target
BAIAP2	ENSG00000175866	ENST00000575245	17.5645	17.5082	39.4521	42.9737	25.9981	22.2607	-0.00462752	0.123354	-0.223906	non_target
BAIAP2L1	ENSG00000006453	ENST00000005260	18.8116	17.6395	20.0758	19.3519	15.999	16.7024	-0.0928122	-0.0529857	0.0620683	non_target
BAIAP3	ENSG00000007516	ENST00000324385	1.17812	0.875542	9.43311	5.69114	0.799713	0.526584	-0.428236	-0.729016	-0.602819	non_target
BAK1	ENSG00000030110	ENST00000374467	25.6943	25.0711	22.018	24.158	51.0098	43.7859	-0.035418	0.133822	-0.22031	A5_target
BAMBI	ENSG00000095739	ENST00000375533	12.0631	10.6481	15.0192	11.6863	12.927	10.447	-0.180002	-0.36199	-0.307302	non_target
BANF1	ENSG00000175334	ENST00000533166	134.825	123.714	80.2761	88.2642	228.335	210.215	-0.124074	0.136858	-0.119285	non_target
BANP	ENSG00000172530	ENST00000393207	6.95782	8.05121	11.5242	18.2377	8.6352	9.09362	0.210571	0.662257	0.0746241	non_target
BAP1	ENSG00000163930	ENST00000460680	50.9769	50.8324	81.5276	80.5099	82.6252	66.5107	-0.00409726	-0.0181227	-0.312996	non_target
BARD1	ENSG00000138376	ENST00000260947	7.39525	7.33572	5.94021	5.11053	1.74079	2.50537	-0.0116605	-0.217042	0.525286	A5_target
BARHL2	ENSG00000143032	ENST00000370445	1.15556	1.28546	1.78615	2.68557	0.897188	1.06743	0.153699	0.588379	0.250663	A5_target
BARX1	ENSG00000131668	ENST00000253968	1.94213	0.767164	4.4122	2.54303	3.7381	2.18924	-1.34003	-0.79495	-0.771875	non_target
BASP1	ENSG00000176788	ENST00000322611	3.92135	3.63515	11.5076	7.7464	3.73469	3.856	-0.109336	-0.570985	0.0461177	A5_target
BATF2	ENSG00000168062	ENST00000301887	0.311796	0.336646	0.768316	1.19564	0.958645	0.545066	0.11063	0.63801	-0.814564	non_target
BATF3	ENSG00000123685	ENST00000243440	9.67454	6.28585	15.3797	15.7588	13.4249	8.83981	-0.622086	0.0351252	-0.602819	non_target
BAX	ENSG00000087088	ENST00000293288	36.0508	35.9649	40.5602	40.6241	59.904	54.9889	-0.00344184	0.00227256	-0.123512	non_target
BAZ1A	ENSG00000198604	ENST00000382422	31.2945	33.0393	35.9247	23.8108	5.28403	6.56896	0.0782734	-0.593364	0.314025	A5_target
BAZ1B	ENSG00000009954	ENST00000339594	41.821	45.369	56.1734	67.2811	14.7548	18.1968	0.117478	0.260313	0.302502	non_target
BAZ2A	ENSG00000076108	ENST00000551812	24.0607	27.3262	38.7606	38.0103	22.1001	21.4255	0.183607	-0.0282032	-0.0447209	A5_target
BAZ2B	ENSG00000123636	ENST00000392783	1.11602	1.29035	3.21561	2.29142	0.0990663	0.129616	0.209408	-0.488847	0.387782	A5_target
BBC3	ENSG00000105327	ENST00000449228	3.05573	2.62249	10.8603	8.11228	4.93845	3.5056	-0.220576	-0.420884	-0.494397	A5_target
BBIP1	ENSG00000214413	ENST00000454061	4.75988	5.90061	1.56388	0.676023	2.34878	2.94702	0.309939	-1.20999	0.327346	non_target
BBOF1	ENSG00000119636	ENST00000394009	1.03465	1.09228	0.968823	1.14618	0.518403	0.293917	0.0782084	0.242525	-0.818669	A5_target
BBS1	ENSG00000174483	ENST00000318312	0.340021	0.390066	1.13112	1.54835	0.174238	0.229869	0.198093	0.452978	0.399755	non_target
BBS10	ENSG00000179941	ENST00000650064	6.7402	7.68891	2.09095	1.07694	1.7475	1.85423	0.189988	-0.957221	0.0855209	A5_target
BBS12	ENSG00000181004	ENST00000542236	1.37683	2.02714	0.647705	0.799958	0.470356	0.738485	0.558089	0.304586	0.650816	non_target
BBS2	ENSG00000125124	ENST00000245157	15.3113	14.8982	15.6189	14.6035	9.54352	9.28505	-0.0394629	-0.0969783	-0.0396113	A5_target
BBS4	ENSG00000140463	ENST00000268057	13.1718	12.4987	15.2493	12.0155	12.1315	10.5844	-0.0756736	-0.343843	-0.196827	non_target
BBS5	ENSG00000163093	ENST00000295240	2.60559	2.69094	9.09492	10.3392	2.0202	2.18341	0.0464996	0.184985	0.112089	non_target
BBS7	ENSG00000138686	ENST00000264499	8.98409	10.7869	6.07654	5.71803	3.19014	3.40911	0.26383	-0.0877315	0.0957776	non_target
BBS9	ENSG00000122507	ENST00000671871	2.54687	2.20393	2.28424	3.08792	1.45864	1.62051	-0.208649	0.434918	0.151827	non_target
BBX	ENSG00000114439	ENST00000325805	11.3849	11.5888	10.1488	9.62716	1.81574	2.65621	0.025619	-0.0761315	0.548814	A5_target
BCAM	ENSG00000187244	ENST00000270233	10.5178	9.94457	25.1708	19.5965	15.4382	13.1181	-0.0808512	-0.361151	-0.234947	non_target
BCAN	ENSG00000132692	ENST00000329117	0.195381	0.140635	0.722175	0.499482	0.222487	0.0853888	-0.474333	-0.531915	-1.38161	non_target
BCAP29	ENSG00000075790	ENST00000379119	2.55402	3.15916	1.45728	1.42629	0.698852	0.658343	0.306772	-0.0310171	-0.0861492	non_target
BCAP31	ENSG00000185825	ENST00000458587	120.224	129.331	109.401	127.491	210.919	197.926	0.105339	0.22076	-0.0917224	A5_target
BCAR1	ENSG00000050820	ENST00000418647	15.9759	16.405	27.0884	32.495	24.2781	20.1773	0.0382355	0.262545	-0.26692	non_target
BCAR3	ENSG00000137936	ENST00000260502	4.3889	3.87711	4.32598	3.74001	3.20314	3.59646	-0.178877	-0.209987	0.167094	A5_target
BCAS1	ENSG00000064787	ENST00000395961	0.0866782	0.163776	0.336403	0.249287	0.111042	0.106542	0.917985	-0.43238	-0.059677	non_target
BCAS2	ENSG00000116752	ENST00000369541	81.1178	75.4	12.9477	15.284	25.6595	31.52	-0.105453	0.23932	0.29677	non_target
BCAS3	ENSG00000141376	ENST00000588462	4.98749	4.47302	6.77931	8.79153	6.76037	5.73495	-0.157066	0.374975	-0.23732	A5_target
BCAS4	ENSG00000124243	ENST00000358791	2.96063	2.63578	2.7646	3.58518	4.84414	4.18817	-0.167671	0.374975	-0.20992	non_target
BCAT1	ENSG00000060982	ENST00000539282	9.40626	8.87577	5.34665	4.54664	5.9542	5.6352	-0.0837481	-0.233834	-0.0794402	non_target
BCAT2	ENSG00000105552	ENST00000598162	35.9219	38.436	46.3422	39.2389	57.4579	50.9989	0.0975934	-0.240045	-0.172039	non_target
BCCIP	ENSG00000107949	ENST00000368759	101.293	96.3695	32.8988	32.9435	37.4193	46.2172	-0.0718881	0.00195836	0.304646	non_target
BCDIN3D	ENSG00000186666	ENST00000333924	4.92546	4.76705	1.77137	4.16888	4.25208	5.56334	-0.0471613	1.2348	0.387782	A5_target
BCHE	ENSG00000114200	ENST00000264381	0.357128	0.353459	0.462012	0.342369	0.0305007	0.0585295	-0.014901	-0.43238	0.940323	non_target
BCKDHB	ENSG00000083123	ENST00000320393	5.36614	5.05642	2.85617	3.891	2.69978	3.35791	-0.0857673	0.446058	0.314719	non_target
BCKDK	ENSG00000103507	ENST00000394951	33.1082	29.9617	52.3001	42.8694	52.7444	43.0291	-0.144069	-0.286866	-0.293706	non_target
BCL10	ENSG00000142867	ENST00000648566	5.96244	5.53746	2.52137	2.80957	3.5732	5.1923	-0.106677	0.156141	0.539158	non_target
BCL11A	ENSG00000119866	ENST00000642384	2.81512	2.5709	4.65641	4.54294	1.55075	1.41871	-0.130925	-0.0355916	-0.12839	A5_target
BCL11B	ENSG00000127152	ENST00000357195	0.411251	0.425904	1.35877	0.675865	0.0946171	0.0742771	0.0505089	-1.00749	-0.349184	A5_target
BCL2	ENSG00000171791	ENST00000398117	0.738673	0.714683	0.872282	0.66216	0.23596	0.471664	-0.0476322	-0.397614	0.999217	A5_target
BCL2L1	ENSG00000171552	ENST00000376062	12.7435	9.41256	8.49701	7.66544	19.1495	16.8174	-0.4371	-0.148587	-0.187353	A5_target
BCL2L11	ENSG00000153094	ENST00000393256	11.1897	13.7792	7.65959	8.29103	6.66201	10.4095	0.30033	0.114285	0.643875	A5_target
BCL2L12	ENSG00000126453	ENST00000616144	28.2978	26.0514	33.305	25.7589	51.1184	41.3787	-0.119327	-0.37067	-0.304955	non_target
BCL2L13	ENSG00000099968	ENST00000618481	9.76737	9.25291	7.45516	8.57532	9.01955	10.9807	-0.078063	0.201951	0.283847	A5_target
BCL2L15	ENSG00000188761	ENST00000393316	0.143006	0.216165	0.158575	0.164515	0.0586246	0.0421868	0.596057	0.0530471	-0.474714	non_target
BCL2L2	ENSG00000129473	ENST00000250405	10.2845	9.75365	14.5745	16.2167	5.65671	7.36031	-0.0764556	0.154035	0.379803	A5_target
BCL2L2-PABPN1	ENSG00000258643	ENST00000557008	0.628766	0.622305	1.85926	2.81297	0.536999	0.412192	-0.014901	0.597368	-0.381605	A5_target
BCL3	ENSG00000069399	ENST00000164227	1.83035	1.85272	3.97469	6.2877	2.46207	1.64986	0.0175205	0.661689	-0.577525	A5_target
BCL6	ENSG00000113916	ENST00000406870	1.58044	1.49602	3.21693	2.65665	0.909715	0.808985	-0.0791946	-0.276076	-0.169301	A5_target
BCL6B	ENSG00000161940	ENST00000293805	14.2053	15.8852	14.7168	15.6415	16.6799	17.7401	0.161256	0.0879176	0.0889042	A5_target
BCL7A	ENSG00000110987	ENST00000538010	13.577	14.0035	12.5778	12.1701	14.032	15.6491	0.0446168	-0.0475298	0.157359	A5_target
BCL7B	ENSG00000106635	ENST00000455335	30.3011	29.8132	24.9785	25.3567	38.0548	41.5145	-0.023418	0.021683	0.125538	non_target
BCL7C	ENSG00000099385	ENST00000380317	11.736	9.36715	32.6166	23.4703	20.5538	15.543	-0.325254	-0.474771	-0.403138	A5_target
BCL9	ENSG00000116128	ENST00000234739	13.6465	13.1108	16.4146	14.1911	11.4138	11.5881	-0.0577676	-0.209987	0.0218694	non_target
BCL9L	ENSG00000186174	ENST00000334801	2.20339	2.95058	6.94908	6.94051	2.70541	2.37068	0.421272	-0.00178076	-0.190549	A5_target
BCLAF1	ENSG00000029363	ENST00000531224	81.708	82.7959	44.7353	42.8509	13.7527	14.1909	0.0190824	-0.0620886	0.0452566	A5_target
BCLAF3	ENSG00000173681	ENST00000379682	1.53517	1.96981	2.26974	1.27976	0.410436	0.306293	0.359657	-0.826659	-0.422247	A5_target
BCO2	ENSG00000197580	ENST00000357685	0.542605	0.665739	1.25806	1.89156	0.0252771	0.0970113	0.295054	0.588379	1.94032	non_target
BCOR	ENSG00000183337	ENST00000378444	49.2424	52.1269	90.6921	102.001	29.968	35.6186	0.0821275	0.169536	0.249212	A5_target
BCORL1	ENSG00000085185	ENST00000540052	7.6626	8.66366	13.6529	15.1347	8.80002	8.22618	0.177142	0.148655	-0.0972849	non_target
BCR	ENSG00000186716	ENST00000305877	25.8736	27.6167	38.4725	37.0243	43.1711	34.1688	0.0940606	-0.0553539	-0.337386	A5_target
BCS1L	ENSG00000074582	ENST00000431802	36.3023	34.1331	59.0822	61.0226	40.6269	36.85	-0.088888	0.0466209	-0.140771	non_target
BDH1	ENSG00000161267	ENST00000392379	2.86136	3.19896	2.92535	3.73528	4.80431	3.57197	0.160903	0.352607	-0.42761	non_target
BDH2	ENSG00000164039	ENST00000296424	7.50062	6.11351	4.72941	2.34988	4.74792	4.89297	-0.295009	-1.00907	0.0434165	non_target
BDKRB2	ENSG00000168398	ENST00000554311	0.283463	0.0765138	0.510778	0.407622	0.0544709	0.174212	-1.88937	-0.325464	1.67729	non_target
BDNF	ENSG00000176697	ENST00000438929	0.176335	0.152311	0.273747	0.135238	0.0361439	0.052019	-0.211298	-1.01734	0.525286	non_target
BDP1	ENSG00000145734	ENST00000358731	9.86362	11.658	17.0139	14.8709	0.94376	1.21799	0.241132	-0.19422	0.368005	A5_target
BEAN1	ENSG00000166546	ENST00000536005	0.393943	0.398756	0.491437	0.660907	0.302803	0.387378	0.0175205	0.427443	0.355361	non_target
BECN1	ENSG00000126581	ENST00000361523	21.7909	26.6012	21.2698	21.3127	17.366	23.5605	0.287767	0.00290649	0.440105	non_target
BEGAIN	ENSG00000183092	ENST00000637716	0.922408	0.853649	2.33791	1.85279	1.03538	0.755864	-0.111763	-0.335518	-0.453956	A5_target
BEND3	ENSG00000178409	ENST00000429433	5.03409	5.00559	6.10699	5.56851	4.33246	4.70692	-0.00819074	-0.133172	0.119599	A5_target
BEND4	ENSG00000188848	ENST00000502486	2.97847	2.49027	2.52076	2.06796	0.816274	0.791356	-0.258269	-0.285652	-0.0447266	A5_target
BEND5	ENSG00000162373	ENST00000371833	0.507321	0.319523	0.843831	0.810589	0.649918	0.332577	-0.666978	-0.0579842	-0.966568	non_target
BEND7	ENSG00000165626	ENST00000341083	3.10082	2.34702	1.63059	2.32909	1.80191	1.98037	-0.40182	0.514378	0.136243	A5_target
BEST1	ENSG00000167995	ENST00000449131	0.0838698	0.0905542	0.148802	0.192968	0.0687641	0.0329888	0.11063	0.374975	-1.05968	non_target
BET1	ENSG00000105829	ENST00000222547	17.2049	18.0544	1.71489	1.85324	7.28093	14.5896	0.0695247	0.111941	1.00275	non_target
BET1L	ENSG00000177951	ENST00000410108	8.76422	12.253	34.3882	28.4375	10.2488	8.50768	0.483439	-0.274118	-0.268624	non_target
BEX2	ENSG00000133134	ENST00000536889	11.0984	10.8348	16.3598	20.3874	11.1019	15.4879	-0.0346696	0.317525	0.480338	non_target
BEX3	ENSG00000166681	ENST00000372645	150.048	133.228	135.437	104.315	147.03	166.819	-0.171525	-0.376675	0.18218	non_target
BEX4	ENSG00000102409	ENST00000372695	59.0817	60.1975	26.496	25.3127	44.5045	58.5262	0.0269919	-0.0659111	0.395134	non_target
BEX5	ENSG00000184515	ENST00000543160	3.24582	4.76254	4.42979	8.29779	2.90005	5.31955	0.553148	0.90549	0.875228	non_target
BFAR	ENSG00000103429	ENST00000261658	24.4828	23.0532	12.1935	10.4945	24.8893	28.3418	-0.0867968	-0.216471	0.187402	non_target
BFSP1	ENSG00000125864	ENST00000377873	2.19534	2.33545	3.79473	2.59981	3.0771	2.47622	0.0892563	-0.54559	-0.313434	A5_target
BGN	ENSG00000182492	ENST00000331595	0.0304184	0.0985282	0.0674603	0.116645	0.0935241	0.0897344	1.69559	0.790013	-0.059677	non_target
BHLHB9	ENSG00000198908	ENST00000457056	0.0694224	0.0599643	0.0923768	0.319455	0.0142297	0.0136531	-0.211298	1.79001	-0.0596769	non_target
BHLHE40	ENSG00000134107	ENST00000256495	18.4386	16.868	19.1871	20.2888	13.6143	14.648	-0.128441	0.0805517	0.105582	A5_target
BHLHE41	ENSG00000123095	ENST00000242728	2.25642	2.39497	2.62931	3.88637	1.48942	1.24103	0.0859679	0.563737	-0.26321	A5_target
BHMG1	ENSG00000237452	ENST00000457052	0.0781097	0.084335	0.0577425	0.199684	0.160104	0.0512053	0.11063	1.79001	-1.64464	non_target
BICC1	ENSG00000122870	ENST00000373886	1.96983	1.548	2.18429	2.43821	0.549421	0.46586	-0.347661	0.158657	-0.238014	non_target
BICD1	ENSG00000151746	ENST00000652176	1.26902	1.30453	2.9829	3.05965	0.40497	0.493173	0.0398086	0.0366527	0.284277	A5_target
BICD2	ENSG00000185963	ENST00000356884	12.2325	13.0157	20.1126	20.2188	8.5777	11.1772	0.0895298	0.00760416	0.381902	non_target
BICDL1	ENSG00000135127	ENST00000397558	1.38229	1.72012	4.05278	5.48032	1.5127	1.63571	0.31545	0.435348	0.11279	A5_target
BICDL2	ENSG00000162069	ENST00000642419	4.46696	4.67458	34.292	27.0117	4.26109	3.14234	0.065542	-0.344288	-0.439381	non_target
BICRA	ENSG00000063169	ENST00000396720	5.94895	6.24803	14.1337	15.3517	7.27278	5.58001	0.0707655	0.119263	-0.382239	non_target
BICRAL	ENSG00000112624	ENST00000314073	1.73182	1.68049	1.50712	1.30298	0.539203	0.8407	-0.0434037	-0.209987	0.640763	A5_target
BID	ENSG00000015475	ENST00000317361	11.7617	10.0044	5.85312	6.71038	14.1416	14.6405	-0.23346	0.197188	0.0500207	A5_target
BIK	ENSG00000100290	ENST00000216115	1.65577	1.13765	2.83752	0.865822	1.92834	2.07223	-0.541447	-1.71249	0.103822	non_target
BIN1	ENSG00000136717	ENST00000316724	12.3752	15.2258	23.2963	20.858	20.5285	20.3476	0.299075	-0.159498	-0.0127725	non_target
BIN3	ENSG00000147439	ENST00000276416	9.31716	10.4806	8.38628	7.92302	12.3855	12.3053	0.169765	-0.0819797	-0.00937189	non_target
BIRC2	ENSG00000110330	ENST00000613397	9.76976	9.57909	3.8649	3.03762	2.50768	2.83881	-0.0284341	-0.347491	0.178934	A5_target
BIRC5	ENSG00000089685	ENST00000301633	54.9415	54.2178	41.4547	47.1785	92.6735	93.2278	-0.0191298	0.186593	0.0086047	non_target
BIRC6	ENSG00000115760	ENST00000421745	9.68122	12.0424	20.6113	24.9244	1.77511	1.99003	0.31486	0.274125	0.164883	A5_target
BIVM	ENSG00000134897	ENST00000651228	1.58176	1.84125	2.90501	3.22232	0.303953	0.388849	0.219154	0.149555	0.355361	A5_target
BIVM-ERCC5	ENSG00000270181	ENST00000639435	0.266879	0.205821	0.479133	0.633532	0.0520981	0.112471	-0.374797	0.40299	1.11025	A5_target
BLCAP	ENSG00000166619	ENST00000414542	32.947	33.0144	17.5651	20.0403	43.2806	41.8779	0.00294916	0.190192	-0.0475302	non_target
BLM	ENSG00000197299	ENST00000355112	17.2653	17.2255	14.3891	12.99	3.05175	3.85488	-0.00332627	-0.147575	0.337046	A5_target
BLMH	ENSG00000108578	ENST00000261714	58.9163	53.5962	35.1596	32.9549	59.3637	59.4294	-0.136538	-0.0934246	0.00159478	A5_target
BLOC1S1	ENSG00000135441	ENST00000548925	3.00839	6.22562	21.4055	21.1497	8.35029	6.5328	1.04923	-0.0173422	-0.354124	non_target
BLOC1S2	ENSG00000196072	ENST00000370372	14.0471	12.5995	3.27287	2.82954	7.39423	11.0988	-0.156902	-0.209987	0.585927	A5_target
BLOC1S3	ENSG00000189114	ENST00000433642	9.25075	11.2856	9.73106	13.0749	12.9465	13.3563	0.286837	0.426129	0.0449566	A5_target
BLOC1S4	ENSG00000186222	ENST00000320776	11.6171	12.3356	23.9538	21.5375	12.9391	15.1054	0.0865844	-0.153404	0.223332	non_target
BLOC1S5	ENSG00000188428	ENST00000397457	9.28665	8.02143	3.34303	2.8902	5.26914	6.24674	-0.211298	-0.209987	0.245537	non_target
BLOC1S6	ENSG00000104164	ENST00000565323	12.5694	11.8999	1.90249	2.64597	3.59317	5.33639	-0.0789605	0.475904	0.57061	non_target
BLVRA	ENSG00000106605	ENST00000402924	21.084	18.3712	9.84397	7.09213	25.0832	24.0668	-0.198698	-0.473022	-0.059677	non_target
BLVRB	ENSG00000090013	ENST00000643519	14.6506	16.5598	27.9223	40.3798	28.3094	23.5606	0.176719	0.532215	-0.264902	non_target
BLZF1	ENSG00000117475	ENST00000367808	12.6758	8.05244	5.40853	3.69724	2.23782	2.67696	-0.654582	-0.548789	0.258499	A5_target
BMERB1	ENSG00000166780	ENST00000300006	1.72918	1.39109	1.42868	1.30017	1.80692	2.20047	-0.313868	-0.135987	0.284277	non_target
BMF	ENSG00000104081	ENST00000354670	2.77633	2.84937	4.22885	3.86077	3.62706	3.04507	0.0374635	-0.131377	-0.252322	A5_target
BMI1	ENSG00000168283	ENST00000376663	22.4024	20.4767	7.7125	4.96209	6.21645	8.31061	-0.129668	-0.636252	0.418863	A5_target
BMP1	ENSG00000168487	ENST00000306385	5.15942	5.5061	15.7276	12.9097	6.61473	4.6229	0.0938216	-0.284841	-0.516884	A5_target
BMP2	ENSG00000125845	ENST00000378827	30.2652	36.078	63.2697	61.7063	20.3612	29.8403	0.253461	-0.0360971	0.551438	non_target
BMP2K	ENSG00000138756	ENST00000335016	4.28995	4.48966	4.46492	5.05063	1.38841	2.34976	0.0656425	0.177829	0.759083	A5_target
BMP4	ENSG00000125378	ENST00000245451	6.89428	5.7629	8.79572	6.254	5.5082	5.39435	-0.258604	-0.492023	-0.0301327	A5_target
BMP5	ENSG00000112175	ENST00000370830	0.216346	0.720232	0.159934	0.622214	0.0923855	0.265926	1.73512	1.95994	1.52529	non_target
BMP6	ENSG00000153162	ENST00000283147	4.80442	4.73803	7.04739	6.52798	3.50874	4.55695	-0.0200738	-0.110452	0.377115	A5_target
BMP7	ENSG00000101144	ENST00000395863	16.661	17.4315	19.4618	19.1805	23.4967	21.4418	0.0652239	-0.0210048	-0.132028	A5_target
BMP8A	ENSG00000183682	ENST00000331593	0.0761971	0.0685583	0.337972	0.0973972	0.0911069	0.112391	-0.152404	-1.79495	0.302893	A5_target
BMP8B	ENSG00000116985	ENST00000372827	2.16533	2.03366	2.59842	2.55925	2.08237	1.47297	-0.09051	-0.0219149	-0.499498	A5_target
BMPER	ENSG00000164619	ENST00000649409	0.419673	0.306953	0.540422	0.207653	0.235865	0.252932	-0.451249	-1.37991	0.100788	non_target
BMPR1A	ENSG00000107779	ENST00000372037	4.54694	4.31197	3.01813	2.8044	1.44688	1.97607	-0.0765488	-0.105964	0.449688	non_target
BMPR1B	ENSG00000138696	ENST00000440890	1.25988	1.31734	1.94116	2.33934	0.557257	0.58684	0.0643363	0.269181	0.0746241	A5_target
BMPR2	ENSG00000204217	ENST00000374580	6.34017	6.37801	5.09033	4.57139	1.99979	2.40282	0.00858572	-0.155125	0.26488	A5_target
BMS1	ENSG00000165733	ENST00000374518	30.8013	30.2184	32.8147	33.3929	8.65047	10.4044	-0.0275651	0.0251973	0.266345	A5_target
BMT2	ENSG00000164603	ENST00000297145	3.3244	2.82441	0.846045	1.04492	0.781947	1.33975	-0.235145	0.304586	0.776824	non_target
BNC2	ENSG00000173068	ENST00000380672	0.234707	0.24738	0.632061	0.600018	0.0687265	0.0439611	0.0758645	-0.0750577	-0.644639	A5_target
BNIP1	ENSG00000113734	ENST00000231668	9.88893	12.4085	9.24664	12.0937	17.0922	14.9279	0.327441	0.387254	-0.195332	non_target
BNIP2	ENSG00000140299	ENST00000267859	8.19288	8.38156	2.35905	2.51684	2.48186	3.01556	0.0328488	0.0934049	0.281005	A5_target
BNIP3	ENSG00000176171	ENST00000368636	20.1639	18.4756	10.5971	10.9364	13.0504	18.0567	-0.126154	0.0454739	0.468437	non_target
BNIP3L	ENSG00000104765	ENST00000380629	8.58396	8.9323	1.97728	2.46478	3.46371	4.8525	0.0573879	0.317944	0.486413	A5_target
BNIPL	ENSG00000163141	ENST00000368931	0.57336	0.412705	1.69542	2.3208	0.130581	0.156613	-0.474333	0.452978	0.262251	non_target
BOC	ENSG00000144857	ENST00000273395	2.92926	3.00007	5.19709	4.55731	2.72762	2.10684	0.0344582	-0.189523	-0.37256	A5_target
BOD1	ENSG00000145919	ENST00000311086	54.3608	48.6363	51.6443	54.0073	56.5907	60.1597	-0.160536	0.0645428	0.0882317	non_target
BOD1L1	ENSG00000038219	ENST00000040738	7.02401	9.55108	24.1398	19.2986	0.513694	0.419613	0.443369	-0.322923	-0.29185	A5_target
BOK	ENSG00000176720	ENST00000318407	0.735914	0.17657	1.57162	0.418074	1.03355	0.616443	-2.0593	-1.91043	-0.745568	non_target
BOLA1	ENSG00000178096	ENST00000369153	6.59582	6.55743	11.0071	10.017	14.1889	12.7149	-0.00842275	-0.135987	-0.158241	non_target
BOLA3	ENSG00000163170	ENST00000327428	39.7206	30.3546	18.3045	7.41798	47.581	47.1748	-0.387972	-1.3031	-0.0123713	non_target
BOP1	ENSG00000261236	ENST00000569669	76.8217	77.1198	185.212	161.763	129.88	95.9777	0.00558724	-0.195294	-0.436411	non_target
BORA	ENSG00000136122	ENST00000613797	8.68142	9.29691	4.08084	4.34224	2.3452	4.33796	0.0988206	0.089573	0.887305	non_target
BORCS5	ENSG00000165714	ENST00000314565	1.32628	1.20335	2.7189	2.26513	1.31357	1.23842	-0.140332	-0.263427	-0.0849881	non_target
BORCS6	ENSG00000196544	ENST00000389017	6.93914	8.20773	15.9944	11.5108	14.2233	13.7237	0.242227	-0.474582	-0.0515946	non_target
BORCS7	ENSG00000166275	ENST00000339834	8.75933	8.58295	1.19749	1.95554	5.38012	8.61335	-0.0293461	0.707551	0.678936	non_target
BORCS8	ENSG00000254901	ENST00000462790	17.5329	16.6711	20.0018	22.9643	29.5043	22.2781	-0.0727156	0.199268	-0.405301	non_target
BORCS8-MEF2B	ENSG00000064489	ENST00000514819	0.254532	0.549637	0.112898	0.58563	0.313033	0.400465	1.11063	2.37498	0.355361	non_target
BPGM	ENSG00000172331	ENST00000393132	16.7856	16.3525	5.88191	4.14843	11.6594	15.7166	-0.0377119	-0.503718	0.430799	non_target
BPHL	ENSG00000137274	ENST00000380379	15.4847	15.6663	14.2187	12.3646	19.3664	18.5448	0.0168217	-0.201575	-0.0625423	A5_target
BPNT1	ENSG00000162813	ENST00000469520	11.0094	11.2093	10.7872	10.6296	12.9448	13.9889	0.0259487	-0.0212256	0.111906	non_target
BPTF	ENSG00000171634	ENST00000321892	15.1364	16.418	23.6161	23.9902	2.85179	2.93569	0.11726	0.0226735	0.0418292	A5_target
BRAF	ENSG00000157764	ENST00000644969	8.03072	8.5495	14.3228	14.7516	3.68353	4.63873	0.0903099	0.0425548	0.33264	A5_target
BRAP	ENSG00000089234	ENST00000419234	9.83343	11.0233	6.99129	7.96747	5.59885	7.55599	0.164786	0.188562	0.432491	A5_target
BRAT1	ENSG00000106009	ENST00000340611	20.7074	20.7727	63.9163	50.7647	31.9126	23.8573	0.00454266	-0.332357	-0.419692	A5_target
BRCA1	ENSG00000012048	ENST00000471181	14.1968	14.9987	11.7031	13.5911	3.46086	3.37871	0.0792767	0.215777	-0.0346585	A5_target
BRCA2	ENSG00000139618	ENST00000380152	3.77996	4.99031	4.31731	3.9615	0.373319	0.305344	0.400758	-0.124087	-0.289975	non_target
BRCC3	ENSG00000185515	ENST00000399042	14.63	15.877	12.8119	17.262	2.84497	3.91009	0.118009	0.430117	0.45879	non_target
BRD1	ENSG00000100425	ENST00000457780	13.9797	15.5888	26.3657	30.1544	11.4648	12.5073	0.157173	0.193708	0.12556	A5_target
BRD2	ENSG00000204256	ENST00000395287	247.982	260.479	288.395	324.656	231.276	240.865	0.0709347	0.170866	0.0586097	non_target
BRD3	ENSG00000169925	ENST00000303407	14.717	17.5417	20.2729	21.6722	13.3206	15.9388	0.253307	0.0962919	0.258879	non_target
BRD3OS	ENSG00000235106	ENST00000599836	1.27131	1.32687	2.53749	2.43753	1.73722	2.20854	0.0617203	-0.0579842	0.346315	non_target
BRD4	ENSG00000141867	ENST00000263377	21.1059	27.1107	38.6816	50.8425	19.7992	22.4526	0.361213	0.394388	0.181446	A5_target
BRD7	ENSG00000166164	ENST00000394689	61.0636	62.0754	31.8948	37.2352	32.9324	39.5713	0.023709	0.223344	0.264945	non_target
BRD8	ENSG00000112983	ENST00000254900	22.2161	26.4524	45.6523	50.6022	10.2475	11.9495	0.251788	0.148512	0.221676	A5_target
BRD9	ENSG00000028310	ENST00000467963	19.2029	20.9654	55.274	58.7037	18.8546	16.8494	0.126682	0.0868498	-0.162225	A5_target
BRF1	ENSG00000185024	ENST00000547530	13.5701	13.978	37.3161	40.5231	19.0029	14.5135	0.0427259	0.118945	-0.388829	A5_target
BRF2	ENSG00000104221	ENST00000220659	4.44545	5.76573	5.39448	6.64721	6.18925	6.02093	0.375176	0.301266	-0.0397774	A5_target
BRI3	ENSG00000164713	ENST00000297290	23.9186	23.2815	35.3635	24.6671	40.1126	37.8636	-0.0389464	-0.519672	-0.0832454	non_target
BRI3BP	ENSG00000184992	ENST00000671775	16.348	16.8785	8.59622	10.1548	16.5246	18.6061	0.0460712	0.240383	0.171153	A5_target
BRICD5	ENSG00000182685	ENST00000562360	0.182821	0.394784	4.25724	5.95902	0.187367	0.179774	1.11063	0.485158	-0.059677	non_target
BRIP1	ENSG00000136492	ENST00000259008	6.91076	7.51822	5.16051	5.26657	1.16549	1.12686	0.121546	0.029351	-0.0486218	A5_target
BRIX1	ENSG00000113460	ENST00000336767	63.3868	65.6701	35.3186	31.5696	21.0242	27.4272	0.0510535	-0.161893	0.383557	A5_target
BRK1	ENSG00000254999	ENST00000530758	103.752	100.664	32.1609	29.1172	126.552	156.064	-0.0435866	-0.143436	0.302408	non_target
BRMS1	ENSG00000174744	ENST00000425825	47.7338	43.7139	56.0169	69.4722	98.541	79.5215	-0.12692	0.310572	-0.309378	non_target
BRMS1L	ENSG00000100916	ENST00000216807	17.0454	12.9824	4.21365	4.99596	4.61766	5.12449	-0.392828	0.245692	0.150246	non_target
BROX	ENSG00000162819	ENST00000340934	15.1206	15.4596	4.56399	6.08586	4.03948	5.23061	0.0319801	0.415164	0.37281	non_target
BRPF1	ENSG00000156983	ENST00000383829	17.0071	19.7474	40.06	46.7569	19.7652	19.083	0.215532	0.223017	-0.0506742	non_target
BRPF3	ENSG00000096070	ENST00000357641	18.0474	18.1705	16.2091	19.1382	15.9629	15.758	0.00981062	0.239649	-0.0186395	non_target
BRSK1	ENSG00000160469	ENST00000590333	3.53425	2.90737	14.2898	10.1415	3.81924	2.64788	-0.281688	-0.494717	-0.528446	non_target
BRSK2	ENSG00000174672	ENST00000382179	7.4857	8.44968	19.4866	18.7275	10.6667	9.05357	0.17476	-0.0573271	-0.236555	non_target
BRWD1	ENSG00000185658	ENST00000333229	3.29605	4.26745	5.04017	5.76483	0.658241	0.694031	0.372634	0.193805	0.0763846	non_target
BRWD3	ENSG00000165288	ENST00000373275	2.99681	3.27154	2.69041	3.1013	0.516618	0.571943	0.126542	0.20505	0.146774	A5_target
BSCL2	ENSG00000168000	ENST00000405837	16.3424	14.9572	23.042	28.0829	23.3668	19.1563	-0.127775	0.285424	-0.286642	non_target
BSDC1	ENSG00000160058	ENST00000341071	30.1456	35.2368	41.5214	53.7711	27.753	30.8063	0.225133	0.372975	0.150583	non_target
BSG	ENSG00000172270	ENST00000333511	338.195	325.715	501.897	544.841	636.703	515.711	-0.0542439	0.118444	-0.304059	non_target
BSN	ENSG00000164061	ENST00000296452	1.50131	1.71774	5.28749	7.13187	1.18498	1.0312	0.194288	0.431698	-0.20054	A5_target
BSPRY	ENSG00000119411	ENST00000374183	0.430431	0.697104	0.954586	1.53267	0.976794	0.876748	0.695592	0.683098	-0.155892	non_target
BST1	ENSG00000109743	ENST00000382346	0.107739	0.271426	0.238937	0.275429	0.294447	0.282516	1.33302	0.20505	-0.059677	non_target
BST2	ENSG00000130303	ENST00000252593	3.57515	5.63573	2.06148	5.75802	4.03044	9.84359	0.656598	1.48189	1.28825	A5_target
BTAF1	ENSG00000095564	ENST00000265990	23.9734	29.6366	45.8312	38.1276	3.41017	4.32058	0.305946	-0.265496	0.34138	A5_target
BTBD1	ENSG00000064726	ENST00000261721	58.3756	44.2285	19.9784	14.2646	17.5003	21.7051	-0.400387	-0.486	0.310656	A5_target
BTBD10	ENSG00000148925	ENST00000530907	11.0173	13.9193	6.44778	5.86778	6.0377	7.74913	0.33731	-0.135987	0.360037	non_target
BTBD11	ENSG00000151136	ENST00000280758	2.27952	1.89633	5.80128	3.53471	2.45109	2.48651	-0.265519	-0.714779	0.0206964	A5_target
BTBD2	ENSG00000133243	ENST00000255608	26.8983	28.6893	37.0722	30.2758	51.8696	42.2451	0.093	-0.292173	-0.296107	non_target
BTBD3	ENSG00000132640	ENST00000405977	18.2942	21.1062	10.4752	10.0981	7.11122	12.5638	0.206278	-0.0528863	0.821099	A5_target
BTBD6	ENSG00000184887	ENST00000392554	28.189	29.3703	71.7075	60.7961	37.385	31.7623	0.059222	-0.238146	-0.235141	A5_target
BTBD7	ENSG00000011114	ENST00000334746	6.1955	7.98869	5.41331	6.95507	2.27576	3.73369	0.36674	0.361555	0.714255	A5_target
BTBD8	ENSG00000189195	ENST00000636805	0.651647	0.652413	0.94594	0.908676	0.0849989	0.0815547	0.00169555	-0.0579842	-0.059677	non_target
BTBD9	ENSG00000183826	ENST00000481247	1.72853	2.07466	1.8795	2.63847	1.56512	1.79048	0.263333	0.489353	0.19408	A5_target
BTD	ENSG00000169814	ENST00000672112	5.42279	4.27996	6.75165	5.7155	5.03761	5.67544	-0.341438	-0.240361	0.171993	A5_target
BTF3	ENSG00000145741	ENST00000380591	335.307	319.861	94.9581	104.727	386.043	399.645	-0.0680349	0.141274	0.0499583	A5_target
BTF3L4	ENSG00000134717	ENST00000313334	18.6949	20.6793	4.20209	4.05674	15.1628	21.8148	0.14554	-0.0507887	0.524772	non_target
BTG1	ENSG00000133639	ENST00000256015	6.81883	6.29384	6.78966	7.82662	7.36869	8.84903	-0.115584	0.20505	0.264111	A5_target
BTG2	ENSG00000159388	ENST00000290551	11.6187	10.9589	11.3423	7.14073	12.7946	15.5258	-0.0843432	-0.66757	0.279125	A5_target
BTG3	ENSG00000154640	ENST00000339775	15.9536	17.9537	15.3924	17.928	9.73115	16.5883	0.170395	0.220001	0.769482	non_target
BTK	ENSG00000010671	ENST00000621635	0.0776016	0.0279288	0.114734	0.198385	0.106041	0.0763083	-1.47433	0.790013	-0.474714	non_target
BTN2A1	ENSG00000112763	ENST00000312541	22.884	23.8522	32.6805	36.2788	9.69594	14.2712	0.0597808	0.150696	0.557651	non_target
BTN2A2	ENSG00000124508	ENST00000356709	7.81067	8.26063	16.3474	11.9499	4.77017	5.59832	0.0808057	-0.452062	0.230955	A5_target
BTN3A1	ENSG00000026950	ENST00000289361	2.80974	2.87401	5.1537	4.77965	2.01356	1.72423	0.0326274	-0.108704	-0.223796	non_target
BTN3A2	ENSG00000186470	ENST00000377708	6.57742	6.63093	8.40752	7.48674	4.52635	5.21898	0.0116881	-0.167343	0.20542	A5_target
BTN3A3	ENSG00000111801	ENST00000244519	1.44595	1.40507	4.38256	3.78892	0.246983	0.284371	-0.0413732	-0.209987	0.203357	A5_target
BTNL9	ENSG00000165810	ENST00000327705	4.16155	3.97907	7.62217	9.28911	0.763884	1.20119	-0.0646883	0.285338	0.653041	A5_target
BTRC	ENSG00000166167	ENST00000370187	10.6578	9.24936	6.61392	6.87986	7.087	7.25548	-0.204479	0.0568739	0.0338971	A5_target
BUB1	ENSG00000169679	ENST00000302759	34.0749	33.9559	36.2447	31.2257	10.4903	14.6301	-0.00504869	-0.215035	0.479885	A5_target
BUB1B	ENSG00000156970	ENST00000412359	25.4496	27.1158	34.3895	29.9582	7.74383	11.5234	0.0914913	-0.199016	0.573442	A5_target
BUB3	ENSG00000154473	ENST00000368865	32.4097	31.4012	13.0441	12.2571	26.8733	32.1711	-0.0456075	-0.0897842	0.25959	A5_target
BUD13	ENSG00000137656	ENST00000260210	16.6855	17.2397	21.7246	28.1728	15.6948	17.756	0.0471411	0.374975	0.178015	non_target
BUD23	ENSG00000071462	ENST00000423497	105.923	105.363	64.0666	70.0236	171.139	163.974	-0.00764903	0.128269	-0.0617075	non_target
BUD31	ENSG00000106245	ENST00000403633	31.8598	36.3666	16.0267	19.7596	48.4304	49.8666	0.190877	0.302075	0.042159	A5_target
BVES	ENSG00000112276	ENST00000314641	4.11392	3.91268	1.80185	1.82977	2.16758	2.53628	-0.0723564	0.0221862	0.226627	A5_target
BX255925.3	ENSG00000284976	ENST00000645271	8.80629	9.95321	56.9282	49.4325	6.83614	5.7116	0.176627	-0.203683	-0.259286	non_target
BX664615.2	ENSG00000283886	ENST00000622735	2.88118	2.29217	2.77448	4.07046	1.08788	1.45386	-0.329943	0.552974	0.41837	non_target
BYSL	ENSG00000112578	ENST00000230340	49.4522	44.5321	59.3174	71.8914	71.7743	64.6873	-0.15119	0.277364	-0.149986	non_target
BZW1	ENSG00000082153	ENST00000452790	98.7368	97.0577	36.6392	36.3345	49.6995	61.7333	-0.0247452	-0.0120479	0.312817	A5_target
BZW2	ENSG00000136261	ENST00000433922	59.2738	52.9166	27.5355	24.3216	62.9931	61.9147	-0.163676	-0.179055	-0.0249116	A5_target
C10orf143	ENSG00000237489	ENST00000637128	0.849045	0.550028	0.753187	1.95349	0.609109	0.751406	-0.626336	1.37498	0.302893	non_target
C10orf82	ENSG00000165863	ENST00000588184	0.740937	0.639991	2.13617	1.98888	0.987167	0.582871	-0.211298	-0.103072	-0.760117	non_target
C10orf88	ENSG00000119965	ENST00000481909	5.57755	5.99555	1.90721	1.7902	1.66199	3.45506	0.10426	-0.0913428	1.0558	A5_target
C10orf95	ENSG00000120055	ENST00000625129	0.194893	0.15782	2.48528	2.4289	0.0998694	0.143734	-0.304408	-0.0331095	0.525286	non_target
C11orf1	ENSG00000137720	ENST00000529270	4.38313	4.03335	3.2034	1.52799	3.52222	4.9468	-0.119983	-1.06797	0.49001	non_target
C11orf24	ENSG00000171067	ENST00000304271	26.7497	26.8293	29.892	26.2405	29.2566	28.7168	0.00428813	-0.187961	-0.0268674	non_target
C11orf45	ENSG00000174370	ENST00000662328	1.16429	1.00141	0.919056	0.908074	0.667407	0.912032	-0.217424	-0.0173422	0.450518	non_target
C11orf49	ENSG00000149179	ENST00000378615	11.6184	11.9359	10.9604	7.97961	14.0843	14.3236	0.0388942	-0.457915	0.0243014	A5_target
C11orf52	ENSG00000149300	ENST00000278601	0.129664	0.839989	0.287562	0.24861	0.33222	0.510012	2.69559	-0.209987	0.618395	non_target
C11orf54	ENSG00000182919	ENST00000331239	2.1285	1.59338	1.51055	0.761799	0.756228	0.586049	-0.417749	-0.987595	-0.367799	non_target
C11orf58	ENSG00000110696	ENST00000228136	49.2622	47.4714	12.5125	14.5635	28.0317	36.6631	-0.053425	0.218989	0.387268	A5_target
C11orf65	ENSG00000166323	ENST00000615746	0.184811	0.0855171	0.292759	0.101241	0.0541159	0.0778846	-1.11176	-1.53192	0.525286	non_target
C11orf68	ENSG00000175573	ENST00000438576	12.4179	11.3791	18.6985	17.9228	19.6769	16.131	-0.126029	-0.0611239	-0.286668	non_target
C11orf74	ENSG00000166352	ENST00000446510	14.2205	13.2437	2.69041	7.75326	9.46282	11.5977	-0.102675	1.52698	0.293502	non_target
C11orf80	ENSG00000173715	ENST00000360962	2.5688	3.15347	4.76046	6.07224	4.07523	2.87202	0.295845	0.351128	-0.504817	non_target
C11orf95	ENSG00000188070	ENST00000433688	7.03724	8.17946	19.5779	14.3091	9.13718	7.58487	0.216995	-0.452298	-0.268624	A5_target
C11orf96	ENSG00000187479	ENST00000339446	0.383044	0.649899	2.91255	3.14754	0.392568	0.538086	0.762707	0.111941	0.454896	A5_target
C11orf98	ENSG00000278615	ENST00000524958	2.95491	1.89062	0.970851	2.09836	6.72973	4.08946	-0.644258	1.11194	-0.71864	non_target
C12orf10	ENSG00000139637	ENST00000267103	38.705	33.3032	30.1093	35.3928	70.6079	56.3288	-0.216858	0.233247	-0.325957	non_target
C12orf29	ENSG00000133641	ENST00000356891	10.2213	11.7462	3.87156	3.29863	4.35613	6.07039	0.200611	-0.231049	0.478743	non_target
C12orf4	ENSG00000047621	ENST00000261250	9.69453	8.74627	3.74275	3.81102	2.59439	3.37434	-0.148503	0.0260801	0.379207	A5_target
C12orf43	ENSG00000157895	ENST00000537817	20.3452	17.3421	17.8732	18.802	21.7174	24.883	-0.230407	0.0730849	0.196306	A5_target
C12orf45	ENSG00000151131	ENST00000637147	5.55773	4.86541	3.08141	2.44801	6.19623	6.60982	-0.191933	-0.331978	0.0932219	A5_target
C12orf49	ENSG00000111412	ENST00000261318	7.02494	7.11707	3.05185	4.03913	8.47063	9.51398	0.0187992	0.404359	0.167579	A5_target
C12orf57	ENSG00000111678	ENST00000229281	33.1718	39.8104	46.4035	39.1395	60.6708	71.7617	0.263188	-0.245611	0.242213	non_target
C12orf65	ENSG00000130921	ENST00000366329	9.86455	10.8947	6.01202	6.3527	9.37667	11.5513	0.143296	0.0795193	0.300913	non_target
C12orf66	ENSG00000174206	ENST00000311915	2.97122	2.40602	2.11802	4.67954	2.12069	2.26954	-0.304408	1.14365	0.0978643	A5_target
C12orf73	ENSG00000204954	ENST00000378090	6.56029	5.17615	4.19685	5.3216	6.8958	6.28556	-0.341882	0.342554	-0.133678	non_target
C12orf75	ENSG00000235162	ENST00000443585	15.4572	13.9736	11.5042	9.24261	13.962	18.4971	-0.145574	-0.315782	0.405795	A5_target
C14orf119	ENSG00000179933	ENST00000319074	19.4533	19.3065	14.2719	9.70142	21.4222	22.583	-0.0109321	-0.55691	0.0761303	A5_target
C14orf132	ENSG00000227051	ENST00000553782	2.67069	2.59519	6.5152	1.53619	1.91597	2.49487	-0.0413732	-2.08446	0.380896	non_target
C14orf28	ENSG00000179476	ENST00000325192	0.877915	0.789904	0.757164	0.654602	0.424879	0.623484	-0.152404	-0.209987	0.5533	A5_target
C14orf93	ENSG00000100802	ENST00000299088	2.10889	2.04697	5.24389	4.16599	2.29232	1.84333	-0.0429933	-0.331978	-0.314491	A5_target
C15orf39	ENSG00000167173	ENST00000360639	26.1611	24.9613	35.0712	39.5566	41.1673	30.9761	-0.0677303	0.17363	-0.410345	non_target
C15orf40	ENSG00000169609	ENST00000451195	16.4428	11.7858	6.7416	12.1867	18.5509	15.2177	-0.480407	0.854143	-0.285745	A5_target
C15orf41	ENSG00000186073	ENST00000569302	5.40084	4.90752	3.37984	5.02384	2.00032	3.07608	-0.138191	0.571833	0.620863	A5_target
C15orf61	ENSG00000189227	ENST00000342683	0.95592	1.03211	1.6657	1.37462	1.62698	0.738563	0.11063	-0.277101	-1.1394	A5_target
C15orf62	ENSG00000188277	ENST00000344320	0.376708	0.531879	0.321324	0.333359	0.237584	0.512903	0.497653	0.0530471	1.11025	non_target
C16orf46	ENSG00000166455	ENST00000299578	0.847299	0.86668	1.1868	1.02604	0.959773	1.14014	0.0326274	-0.209987	0.248445	A5_target
C16orf58	ENSG00000140688	ENST00000327237	17.5788	16.1772	37.7314	32.1277	26.181	19.535	-0.119871	-0.231947	-0.422454	non_target
C16orf70	ENSG00000125149	ENST00000219139	14.6731	17.7236	10.2304	13.4551	15.7169	20.4365	0.272491	0.395295	0.378829	A5_target
C16orf71	ENSG00000166246	ENST00000590191	0.251237	0.42196	0.247635	0.321137	0.572185	0.19215	0.74806	0.374975	-1.57425	non_target
C16orf72	ENSG00000182831	ENST00000327827	7.90061	7.49159	11.2277	11.1594	4.36279	5.06105	-0.0766921	-0.00880046	0.214184	A5_target
C16orf74	ENSG00000154102	ENST00000602719	0.928611	0.154249	6.65352	2.73918	0.585661	0.280965	-2.58981	-1.28038	-1.05968	non_target
C16orf86	ENSG00000159761	ENST00000403458	0.508823	0.793544	4.13762	3.25196	0.869124	0.333563	0.641145	-0.347491	-1.38161	non_target
C16orf87	ENSG00000155330	ENST00000285697	4.08848	3.97402	0.834832	0.641555	1.21096	1.68628	-0.0409633	-0.379912	0.477696	non_target
C16orf91	ENSG00000174109	ENST00000442039	24.1964	27.6418	31.6776	45.7941	28.5577	34.0779	0.192058	0.531701	0.254959	A5_target
C16orf95	ENSG00000260456	ENST00000567970	4.30419	2.47353	3.07923	6.1229	6.47451	5.59777	-0.799172	0.991647	-0.20992	non_target
C16orf96	ENSG00000205832	ENST00000444310	0.0748883	0.0606427	0.373687	0.430759	0.115125	0.0552302	-0.304408	0.20505	-1.05968	non_target
C17orf100	ENSG00000256806	ENST00000542475	2.62927	3.15424	7.21939	6.24149	2.09583	2.38026	0.262633	-0.209987	0.183594	A5_target
C17orf107	ENSG00000205710	ENST00000381365	0.0894402	0.0241421	0.843011	0.428718	0.022916	0.0219874	-1.88937	-0.975522	-0.059677	non_target
C17orf113	ENSG00000267221	ENST00000587304	0.99702	1.44911	3.14662	2.72039	1.39516	0.848427	0.539473	-0.209987	-0.717571	A5_target
C17orf49	ENSG00000258315	ENST00000546495	33.3439	23.5872	17.0528	14.3295	55.0892	39.1481	-0.499424	-0.251015	-0.492829	non_target
C17orf58	ENSG00000186665	ENST00000580729	5.40708	4.90244	4.30465	6.64565	4.83107	5.01022	-0.141349	0.626514	0.0525325	A5_target
C17orf67	ENSG00000214226	ENST00000397861	1.86227	0.79669	4.83138	7.27596	1.15235	1.10565	-1.22497	0.590704	-0.059677	non_target
C17orf75	ENSG00000108666	ENST00000225805	4.18729	4.67284	3.569	4.13406	2.94633	3.10349	0.158283	0.212037	0.0749726	A5_target
C17orf80	ENSG00000141219	ENST00000359042	15.9447	15.1378	12.7161	9.86419	5.41351	7.14437	-0.0749257	-0.366389	0.400242	A5_target
C17orf97	ENSG00000187624	ENST00000360127	1.71063	1.09139	1.63821	2.9817	1.95239	2.14089	-0.648362	0.864013	0.132968	non_target
C18orf21	ENSG00000141428	ENST00000592875	30.3737	38.9141	12.8921	6.68748	16.8305	23.7226	0.357467	-0.946953	0.495183	non_target
C18orf25	ENSG00000152242	ENST00000615052	7.0971	7.84687	4.88771	5.98632	3.29394	4.12796	0.144887	0.292513	0.325613	A5_target
C18orf32	ENSG00000177576	ENST00000613385	0.344937	0.286484	0.529604	0.356118	0.149563	0.156549	-0.267882	-0.572557	0.0658539	non_target
C18orf54	ENSG00000166845	ENST00000620105	3.12503	2.60171	0.584502	0.433139	0.617394	0.580035	-0.26441	-0.43238	-0.0900506	non_target
C19orf12	ENSG00000131943	ENST00000392278	9.27669	8.72087	9.75461	12.5733	7.78619	10.5376	-0.0891396	0.366205	0.436557	non_target
C19orf25	ENSG00000119559	ENST00000588871	10.7631	10.3862	21.5574	19.7337	21.7167	17.3308	-0.0514268	-0.127525	-0.325462	non_target
C19orf38	ENSG00000214212	ENST00000397820	0.47322	0.574802	1.31185	0.907324	0.424363	0.814334	0.280555	-0.531915	0.940323	non_target
C19orf44	ENSG00000105072	ENST00000221671	6.58845	6.18971	14.991	17.4719	5.41496	5.40589	-0.0900674	0.220942	-0.00241965	non_target
C19orf47	ENSG00000160392	ENST00000582783	7.67433	8.60548	10.8506	11.0452	13.1018	11.3682	0.165215	0.025641	-0.20477	A5_target
C19orf48	ENSG00000167747	ENST00000391812	114.751	109.007	225.429	231.961	178.19	145.664	-0.0740893	0.04121	-0.29077	non_target
C19orf53	ENSG00000104979	ENST00000588234	116.019	113.205	75.0315	71.2937	229.058	199.454	-0.0354321	-0.0737216	-0.199655	non_target
C19orf54	ENSG00000188493	ENST00000378313	15.0215	17.1549	21.4882	29.9235	20.0824	15.0057	0.191588	0.477735	-0.420424	non_target
C19orf57	ENSG00000132016	ENST00000586783	1.74999	2.23586	8.21484	8.38831	2.60057	2.29443	0.353486	0.0301467	-0.180692	non_target
C19orf73	ENSG00000221916	ENST00000408991	2.12215	1.14564	4.92033	7.02809	2.66922	1.32796	-0.88937	0.514378	-1.00721	non_target
C19orf81	ENSG00000235034	ENST00000425202	1.31675	0.913943	8.55203	6.85262	1.63866	1.47977	-0.5268	-0.319612	-0.14714	A5_target
C1D	ENSG00000197223	ENST00000407324	16.2457	15.5791	2.53238	1.79129	7.18115	14.2397	-0.0604479	-0.499494	0.987629	non_target
C1GALT1	ENSG00000106392	ENST00000436587	3.8097	4.0887	0.657703	0.524874	0.958571	1.18892	0.101965	-0.325464	0.310691	A5_target
C1GALT1C1	ENSG00000171155	ENST00000304661	22.3561	17.2413	6.30667	3.52309	9.68489	12.1748	-0.374797	-0.840038	0.330094	A5_target
C1GALT1C1L	ENSG00000223658	ENST00000475092	0.671536	0.543792	0.248216	0.214594	0.172058	0.330172	-0.304408	-0.209987	0.940323	non_target
C1orf109	ENSG00000116922	ENST00000358011	23.4935	27.4988	11.7955	16.7826	18.1906	23.7295	0.227112	0.508727	0.383494	A5_target
C1orf112	ENSG00000000460	ENST00000286031	8.29968	8.6595	7.39908	6.74347	4.83413	6.0281	0.0612277	-0.133856	0.318448	non_target
C1orf115	ENSG00000162817	ENST00000294889	10.0516	9.30234	6.47894	4.74689	13.0165	11.5396	-0.111762	-0.448774	-0.173749	A5_target
C1orf116	ENSG00000182795	ENST00000359470	0.0520447	0.0702408	0.201988	0.299362	0.120012	0.102355	0.432558	0.56762	-0.229602	non_target
C1orf122	ENSG00000197982	ENST00000373042	10.5558	10.2341	34.3984	35.315	17.9384	13.9281	-0.0446483	0.0379402	-0.365054	A5_target
C1orf131	ENSG00000143633	ENST00000366649	42.4442	41.0173	20.7575	27.4465	18.0564	25.4949	-0.0493345	0.40299	0.4977	non_target
C1orf159	ENSG00000131591	ENST00000379339	7.01306	7.25385	26.8587	23.39	8.96919	6.98312	0.0487022	-0.199495	-0.361107	A5_target
C1orf167	ENSG00000215910	ENST00000433342	0.0787398	0.170031	1.57162	1.08699	0.161395	0.0929131	1.11063	-0.531915	-0.796643	non_target
C1orf174	ENSG00000198912	ENST00000361605	25.4971	27.3412	13.5093	13.6816	24.3473	29.5218	0.100748	0.0182817	0.278018	A5_target
C1orf198	ENSG00000119280	ENST00000366663	18.979	20.139	14.4846	10.7547	24.9435	27.3707	0.0855902	-0.429554	0.133964	A5_target
C1orf21	ENSG00000116667	ENST00000235307	3.83149	3.97169	3.76286	2.95984	3.26398	3.88388	0.0518453	-0.346309	0.250866	non_target
C1orf216	ENSG00000142686	ENST00000270815	8.19784	6.76338	11.4762	12.1149	3.09829	2.70493	-0.2775	0.0781381	-0.195881	A5_target
C1orf226	ENSG00000239887	ENST00000426197	2.72925	1.76806	7.71729	4.44796	3.49638	2.01282	-0.626336	-0.79495	-0.796643	A5_target
C1orf35	ENSG00000143793	ENST00000272139	55.4286	55.6528	154.673	174.254	63.1186	57.5057	0.00582384	0.171963	-0.134362	non_target
C1orf43	ENSG00000143612	ENST00000368521	155.846	151.526	71.1887	73.9193	196.055	225.526	-0.0405544	0.0543022	0.20204	non_target
C1orf50	ENSG00000164008	ENST00000372525	1.93973	2.43526	2.76784	3.05602	2.57356	2.69107	0.328221	0.142894	0.0644134	A5_target
C1orf52	ENSG00000162642	ENST00000471115	14.4073	14.0831	9.07331	8.68775	9.4905	14.4916	-0.0328329	-0.0626456	0.610664	non_target
C1orf53	ENSG00000203724	ENST00000367393	3.22085	1.54558	2.38101	0.457442	3.17868	2.69797	-1.0593	-2.37991	-0.236555	non_target
C1orf54	ENSG00000118292	ENST00000369102	1.37313	0.864832	0.380657	0.877587	1.29	1.57529	-0.666978	1.20505	0.288246	non_target
C1orf56	ENSG00000143443	ENST00000368926	2.98656	2.37211	3.42592	4.21242	4.96064	3.7807	-0.332314	0.29816	-0.391873	A5_target
C1orf61	ENSG00000125462	ENST00000615748	0.652372	0.905613	7.64734	5.00328	1.81475	1.37464	0.4732	-0.612086	-0.400714	non_target
C1orf74	ENSG00000162757	ENST00000294811	4.38554	4.02563	2.60942	2.57824	4.80779	4.5679	-0.12354	-0.0173422	-0.0738443	A5_target
C1QBP	ENSG00000108561	ENST00000225698	523.063	481.39	450.674	479.199	795.977	741.326	-0.119778	0.0885403	-0.102618	non_target
C1QL1	ENSG00000131094	ENST00000253407	6.98402	6.27544	18.9192	15.997	14.1712	8.29647	-0.154342	-0.242048	-0.772395	A5_target
C1QL4	ENSG00000186897	ENST00000334221	3.03838	2.68407	15.7739	12.578	4.52934	3.0896	-0.178877	-0.326632	-0.551882	non_target
C1QTNF1	ENSG00000173918	ENST00000339142	1.2006	1.29629	3.22589	3.0988	2.57922	2.15686	0.11063	-0.0579842	-0.258006	A5_target
C1QTNF2	ENSG00000145861	ENST00000393975	0.0300103	0.0648042	0.266221	0.11508	0.153782	0.118041	1.11063	-1.20999	-0.381605	non_target
C1QTNF3	ENSG00000082196	ENST00000382065	0.153264	0.1379	0.169951	0.195907	0.0523584	0.0502368	-0.152404	0.20505	-0.059677	non_target
C1QTNF6	ENSG00000133466	ENST00000337843	1.41021	1.44247	3.84078	3.60515	0.380336	0.170298	0.0326274	-0.0913428	-1.15921	A5_target
C1R	ENSG00000159403	ENST00000536053	2.95813	1.87682	5.20772	4.91161	3.25046	2.63894	-0.656393	-0.0844564	-0.300685	A5_target
C1RL	ENSG00000139178	ENST00000266542	0.515079	0.44027	0.428368	0.905283	0.813823	0.168832	-0.226405	1.07952	-2.26913	non_target
C1S	ENSG00000182326	ENST00000406697	0.744598	0.829065	1.85775	1.69533	0.143083	0.183047	0.155024	-0.131985	0.355361	A5_target
C2	ENSG00000166278	ENST00000299367	0.0274232	0.207262	0.121635	0.210318	0.084315	0.161797	2.91798	0.790013	0.940323	non_target
C20orf194	ENSG00000088854	ENST00000252032	2.06315	2.23883	3.46631	3.59614	0.779567	0.840195	0.117898	0.0530471	0.10805	non_target
C20orf27	ENSG00000101220	ENST00000217195	84.1083	73.9551	69.9795	57.1276	155.553	120.114	-0.185598	-0.292745	-0.373009	non_target
C20orf96	ENSG00000196476	ENST00000360321	5.08651	4.51121	13.4964	11.6683	4.189	3.52802	-0.173163	-0.209987	-0.247749	non_target
C21orf58	ENSG00000160298	ENST00000291691	3.32009	4.80558	20.3286	26.2933	2.78622	2.50772	0.533487	0.371184	-0.151935	A5_target
C21orf59-TCP10L	ENSG00000265590	ENST00000673807	2.20068	1.93965	0.996031	0.746298	1.70305	1.67821	-0.182152	-0.416438	-0.0212028	non_target
C21orf91	ENSG00000154642	ENST00000284881	5.05372	5.28464	0.941344	0.610375	1.12832	1.05651	0.0644597	-0.625025	-0.0948664	A5_target
C22orf23	ENSG00000128346	ENST00000403305	0.737121	0.676489	0.572162	1.13065	1.13317	0.724837	-0.123835	0.982658	-0.644639	non_target
C22orf39	ENSG00000242259	ENST00000399562	7.3711	7.03584	3.6959	6.22668	6.63471	7.31129	-0.0671572	0.752538	0.140093	non_target
C2CD2L	ENSG00000172375	ENST00000336702	4.4856	5.15085	8.25111	10.0674	5.5965	5.48774	0.199511	0.287028	-0.0283128	non_target
C2CD3	ENSG00000168014	ENST00000334126	5.50296	5.32021	9.01354	10.3097	2.99498	4.19107	-0.0487258	0.193835	0.48477	A5_target
C2CD4A	ENSG00000198535	ENST00000355522	0.145434	0.112161	0.184307	0.398353	0.14905	0.0817204	-0.374797	1.11194	-0.867032	A5_target
C2CD4C	ENSG00000183186	ENST00000332235	0.438824	0.598482	2.04884	2.12558	1.01782	0.681333	0.447665	0.0530471	-0.579051	non_target
C2CD5	ENSG00000111731	ENST00000545552	9.7536	9.44001	6.6768	6.40498	2.11334	1.82494	-0.047146	-0.0599618	-0.21168	non_target
C2orf15	ENSG00000273045	ENST00000650052	1.06904	1.09927	0.112898	1.75689	0.939099	1.20139	0.0402406	3.95994	0.355361	non_target
C2orf42	ENSG00000115998	ENST00000264434	4.1597	3.95227	5.65809	8.29458	3.01261	3.6268	-0.0737946	0.551853	0.267685	A5_target
C2orf49	ENSG00000135974	ENST00000258457	9.83038	10.5465	3.52973	3.88931	3.43822	6.09146	0.101441	0.139955	0.825125	non_target
C2orf50	ENSG00000150873	ENST00000381585	0.0452888	0.0195593	0.100439	0.277869	0.0278489	0.0178136	-1.2113	1.46808	-0.644639	non_target
C2orf68	ENSG00000168887	ENST00000306336	7.65315	7.63026	8.57922	9.88949	7.79194	7.80555	-0.00432124	0.20505	0.00251779	A5_target
C2orf69	ENSG00000178074	ENST00000319974	7.36882	8.10267	2.75237	1.93338	1.78864	2.59331	0.136964	-0.509548	0.535933	non_target
C2orf72	ENSG00000204128	ENST00000373640	1.06504	1.32028	2.18702	2.11767	1.6777	1.10547	0.309939	-0.0464885	-0.601826	non_target
C2orf74	ENSG00000237651	ENST00000432605	6.53612	4.70469	2.14747	1.85659	2.56367	2.77718	-0.474333	-0.209987	0.11541	non_target
C2orf76	ENSG00000186132	ENST00000409466	5.7882	5.84632	0.828178	1.19333	4.84775	5.63054	0.0144146	0.526978	0.215957	non_target
C2orf81	ENSG00000284308	ENST00000290390	1.0606	1.31864	3.77769	4.4368	1.05403	1.20095	0.314163	0.232017	0.188251	non_target
C2orf88	ENSG00000187699	ENST00000340623	0.212861	0.229826	0.157357	0.204064	0.145436	0.0523284	0.11063	0.374975	-1.47471	non_target
C2orf92	ENSG00000228486	ENST00000627399	0.603721	0.289706	1.19013	1.02892	0.068748	0.131924	-1.0593	-0.209987	0.940323	non_target
C3	ENSG00000125730	ENST00000245907	0.7936	0.694343	1.79035	1.73148	0.911492	0.686191	-0.192762	-0.0482362	-0.409619	non_target
C3orf14	ENSG00000114405	ENST00000494481	7.83766	7.7827	0.585402	0.467175	5.43132	6.88842	-0.0101519	-0.325464	0.34287	non_target
C3orf18	ENSG00000088543	ENST00000357203	2.07423	1.45425	2.98709	3.82206	2.4571	2.06615	-0.5123	0.35561	-0.250008	A5_target
C3orf33	ENSG00000174928	ENST00000340171	2.37133	3.45643	0.78885	0.909328	1.41767	2.64271	0.543589	0.20505	0.898503	non_target
C3orf38	ENSG00000179021	ENST00000318887	13.7871	13.2853	4.20836	4.09311	5.83429	8.39682	-0.0534895	-0.0400623	0.525286	A5_target
C3orf52	ENSG00000114529	ENST00000431717	9.89638	10.0455	4.79139	4.94412	8.24966	11.0335	0.0215787	0.0452698	0.419491	A5_target
C3orf62	ENSG00000188315	ENST00000343010	3.55199	3.83508	4.53163	6.07808	1.50701	1.52106	0.11063	0.423585	0.0133865	A5_target
C3orf67	ENSG00000163689	ENST00000482387	1.01509	0.862801	1.67643	1.2423	0.376288	0.488467	-0.234506	-0.43238	0.376422	non_target
C3orf70	ENSG00000187068	ENST00000335012	0.359922	0.636885	0.288245	0.421724	0.194682	0.255612	0.823348	0.549005	0.392835	non_target
C3orf80	ENSG00000180044	ENST00000326474	1.13234	1.02356	1.86883	1.31275	0.566753	0.880419	-0.14571	-0.509548	0.635468	A5_target
C4A	ENSG00000244731	ENST00000428956	0.0527544	0.113918	0.321738	0.101148	0.0135165	0.0518752	1.11063	-1.66942	1.94032	non_target
C4orf19	ENSG00000154274	ENST00000381980	0.216118	0.21213	0.130717	0.0753405	0.241628	0.289796	-0.0268736	-0.79495	0.262251	non_target
C4orf3	ENSG00000164096	ENST00000399075	11.0989	10.8869	1.44791	1.66905	10.2597	12.0552	-0.0278168	0.20505	0.232678	non_target
C4orf33	ENSG00000151470	ENST00000281146	2.55209	2.49247	0.900436	0.934161	0.487442	0.581761	-0.0341052	0.0530471	0.255196	non_target
C4orf46	ENSG00000205208	ENST00000379205	12.0567	11.8467	3.44254	2.77238	6.77752	9.61841	-0.0253477	-0.312349	0.505042	non_target
C4orf48	ENSG00000243449	ENST00000409248	2.64479	2.6771	35.1928	27.8903	4.23522	2.60071	0.0175205	-0.335518	-0.703533	non_target
C5	ENSG00000106804	ENST00000223642	0.275085	0.268723	0.435763	0.100463	0.1074	0.0515239	-0.03376	-2.11688	-1.05968	non_target
C5AR1	ENSG00000197405	ENST00000355085	0.585162	0.964324	0.614719	1.0629	0.220946	0.726833	0.720683	0.790013	1.71793	non_target
C5orf15	ENSG00000113583	ENST00000231512	59.5364	55.84	32.2111	21.9522	29.9384	41.6243	-0.0924712	-0.553192	0.475429	A5_target
C5orf22	ENSG00000082213	ENST00000325366	12.8441	15.339	3.68839	4.8408	6.20183	9.67453	0.256091	0.392253	0.641498	non_target
C5orf24	ENSG00000181904	ENST00000394976	18.5449	19.5364	8.33799	9.07145	4.90663	7.14479	0.0751429	0.121634	0.542159	non_target
C5orf30	ENSG00000181751	ENST00000319933	8.59948	5.5347	3.24055	2.75568	3.78063	3.48611	-0.635743	-0.233834	-0.11701	non_target
C5orf34	ENSG00000172244	ENST00000306862	5.09203	4.32416	2.09361	3.07156	1.31932	1.74407	-0.23582	0.552974	0.402666	non_target
C5orf51	ENSG00000205765	ENST00000381647	16.768	20.2699	2.26936	2.82523	4.50248	6.41297	0.273625	0.316082	0.510273	A5_target
C5orf63	ENSG00000164241	ENST00000535381	1.63815	2.01361	2.34748	2.65768	0.46492	0.619557	0.297715	0.179055	0.414254	non_target
C6orf120	ENSG00000185127	ENST00000332290	18.8665	18.3708	12.9749	11.5261	8.58136	10.6351	-0.0384119	-0.170817	0.309557	A5_target
C6orf136	ENSG00000204564	ENST00000293604	9.01014	8.67337	14.6055	16.5123	9.12291	10.0698	-0.0549561	0.177036	0.142467	non_target
C6orf226	ENSG00000221821	ENST00000408925	2.6985	2.49734	4.27471	4.92757	3.16068	2.1481	-0.111763	0.20505	-0.557177	non_target
C6orf47	ENSG00000204439	ENST00000375911	8.74126	9.12645	10.4287	14.0496	12.1222	11.9714	0.0622128	0.429969	-0.0180579	non_target
C6orf62	ENSG00000112308	ENST00000378119	46.179	46.1405	10.0989	14.1039	19.6548	25.9195	-0.00120412	0.48189	0.399156	A5_target
C6orf89	ENSG00000198663	ENST00000355190	16.8411	16.2351	12.9752	14.6773	19.5574	19.3025	-0.0528688	0.177829	-0.0189202	non_target
C7orf25	ENSG00000136197	ENST00000447342	7.06715	6.95214	4.61487	4.66727	3.33976	5.86836	-0.0236712	0.0162886	0.813211	A5_target
C7orf26	ENSG00000146576	ENST00000344417	13.9666	14.7249	14.4304	16.0042	22.5316	18.8719	0.0762784	0.149341	-0.255715	non_target
C7orf31	ENSG00000153790	ENST00000283905	3.41735	2.99277	0.842091	0.946433	1.55659	1.79221	-0.191399	0.168524	0.203357	non_target
C7orf50	ENSG00000146540	ENST00000397098	22.0615	20.0246	31.7023	36.5868	42.1323	34.9275	-0.139763	0.206739	-0.270563	non_target
C8orf33	ENSG00000182307	ENST00000648531	43.6187	47.7613	53.4727	64.0662	72.5758	76.8691	0.130895	0.26076	0.0829161	non_target
C8orf34	ENSG00000165084	ENST00000518698	0.379473	0.630334	1.55368	1.00742	0.478656	0.574076	0.732118	-0.625025	0.262251	A5_target
C8orf37	ENSG00000156172	ENST00000286688	0.900039	1.13373	0.760403	0.657402	0.241585	0.526809	0.333022	-0.209987	1.12475	non_target
C8orf48	ENSG00000164743	ENST00000297324	0.453641	0.217687	0.223569	0.966428	0.154973	0.297387	-1.0593	2.11194	0.940323	non_target
C8orf58	ENSG00000241852	ENST00000289989	2.61094	2.18005	2.9338	2.93689	3.38942	3.11514	-0.260208	0.00151683	-0.121738	A5_target
C8orf76	ENSG00000189376	ENST00000276704	6.06471	5.30924	3.27162	3.14273	6.77545	7.3068	-0.191933	-0.0579842	0.108923	A5_target
C8orf82	ENSG00000213563	ENST00000524821	8.57145	8.93981	34.7857	26.4963	13.8043	10.8654	0.0607047	-0.392706	-0.345372	non_target
C8orf88	ENSG00000253250	ENST00000517562	15.0575	14.0305	3.65957	3.16387	8.6672	10.2091	-0.101915	-0.209987	0.236213	non_target
C9orf116	ENSG00000160345	ENST00000429260	7.95272	5.95334	11.2878	12.6051	12.606	12.408	-0.417749	0.159247	-0.0228402	non_target
C9orf16	ENSG00000171159	ENST00000372994	24.1971	21.9542	41.2618	31.969	59.7044	37.0904	-0.140332	-0.368135	-0.686793	non_target
C9orf40	ENSG00000135045	ENST00000376854	8.95062	7.46164	12.6258	14.3595	6.42745	7.66385	-0.262494	0.185633	0.253823	A5_target
C9orf43	ENSG00000157653	ENST00000288462	0.168015	0.145125	0.298092	0.515428	0.206631	0.462603	-0.211298	0.790013	1.16272	non_target
C9orf64	ENSG00000165118	ENST00000376344	12.0644	12.8694	5.85284	5.7829	9.83801	12.6619	0.0931848	-0.0173422	0.364051	A5_target
C9orf72	ENSG00000147894	ENST00000644136	7.75079	9.17651	2.37093	1.8448	2.68435	3.52171	0.243604	-0.36199	0.391702	non_target
C9orf78	ENSG00000136819	ENST00000372447	44.5397	45.3772	18.7474	20.6422	32.2431	46.3853	0.0268756	0.138908	0.524676	non_target
C9orf85	ENSG00000155621	ENST00000377031	4.26731	4.25837	1.43391	2.23143	1.4578	2.60673	-0.00302686	0.63801	0.838443	non_target
CA11	ENSG00000063180	ENST00000084798	5.84282	6.12824	15.9197	16.4839	9.23877	8.3309	0.0688097	0.0502485	-0.149229	non_target
CA12	ENSG00000074410	ENST00000178638	2.21836	1.69816	3.30588	1.62033	1.40742	1.4081	-0.385523	-1.02875	0.000695649	A5_target
CA13	ENSG00000185015	ENST00000321764	0.773978	1.01473	0.490425	1.13065	0.339952	0.543628	0.390738	1.20505	0.677289	non_target
CA14	ENSG00000118298	ENST00000369111	0.200152	0.345767	0.266332	0.153504	0.164103	0.157453	0.788702	-0.79495	-0.059677	non_target
CA2	ENSG00000104267	ENST00000285379	256.422	219.419	136.784	99.6299	187.236	203.62	-0.224832	-0.457245	0.121023	A5_target
CA5B	ENSG00000169239	ENST00000318636	1.62265	1.96673	3.36645	2.89038	1.148	1.16325	0.277449	-0.219971	0.019035	non_target
CA8	ENSG00000178538	ENST00000317995	5.55373	4.02902	4.26243	3.01505	3.42788	3.50988	-0.46303	-0.499494	0.0341052	A5_target
CAAP1	ENSG00000120159	ENST00000333916	9.64934	7.64754	6.03292	5.21573	4.2608	6.86405	-0.335434	-0.209987	0.687936	A5_target
CAB39	ENSG00000135932	ENST00000258418	22.3939	23.4925	9.369	9.46185	7.20322	10.1832	0.0690931	0.0142279	0.499476	A5_target
CAB39L	ENSG00000102547	ENST00000610540	0.697909	0.71167	0.386947	0.297362	0.337763	0.324076	0.0281678	-0.379912	-0.059677	non_target
CABCOCO1	ENSG00000183346	ENST00000330194	0.33982	0.183452	0.0942042	0.162887	0.174134	0.0835391	-0.88937	0.790013	-1.05968	non_target
CABIN1	ENSG00000099991	ENST00000398319	21.0705	23.349	55.7055	55.0399	27.292	20.4559	0.148138	-0.0173422	-0.415966	A5_target
CABLES1	ENSG00000134508	ENST00000256925	12.9498	11.2319	14.439	12.4557	18.5805	14.4366	-0.205333	-0.213162	-0.364063	A5_target
CABLES2	ENSG00000149679	ENST00000279101	5.20026	5.12471	4.2357	3.77073	6.99626	5.69004	-0.0211143	-0.167759	-0.298144	A5_target
CABP1	ENSG00000157782	ENST00000316803	0.733876	0.512707	2.4892	0.99324	0.575153	0.466947	-0.517401	-1.32546	-0.300685	non_target
CABP7	ENSG00000100314	ENST00000216144	0.257617	0.23179	0.856993	0.411616	0.418035	0.358875	-0.152404	-1.05798	-0.220142	non_target
CACFD1	ENSG00000160325	ENST00000540581	2.13729	2.57597	4.29905	3.14492	4.12617	3.22583	0.269328	-0.450995	-0.355133	A5_target
CACHD1	ENSG00000158966	ENST00000651257	16.5274	20.5148	32.908	35.0194	6.31787	8.05481	0.311806	0.0897196	0.350411	A5_target
CACNA1B	ENSG00000148408	ENST00000371355	0.304193	0.192256	0.822712	1.02423	0.190096	0.30642	-0.66196	0.316082	0.688784	A5_target
CACNA1C	ENSG00000151067	ENST00000399634	0.612957	0.529447	2.69785	1.5911	0.318931	0.472921	-0.211298	-0.761783	0.568354	non_target
CACNA1D	ENSG00000157388	ENST00000288139	0.485817	0.467165	1.44778	1.74652	0.225609	0.164217	-0.0564801	0.270639	-0.458226	non_target
CACNA1G	ENSG00000006283	ENST00000359106	0.224658	0.197644	2.02985	1.56345	0.332575	0.180004	-0.184826	-0.376637	-0.885648	non_target
CACNA1H	ENSG00000196557	ENST00000348261	7.16703	7.37154	35.9416	23.7765	6.56876	5.9258	0.0405911	-0.596116	-0.148611	A5_target
CACNA1I	ENSG00000100346	ENST00000402142	0.0572481	0.108169	0.380886	0.137205	0.0220018	0.00703676	0.917985	-1.47302	-1.64464	non_target
CACNA2D1	ENSG00000153956	ENST00000356253	2.46745	2.72419	5.34874	3.9128	0.608432	0.565535	0.14281	-0.450995	-0.105481	A5_target
CACNA2D2	ENSG00000007402	ENST00000423994	3.86817	3.79942	9.17435	7.05606	3.75787	2.93202	-0.0258721	-0.378742	-0.358018	A5_target
CACNA2D3	ENSG00000157445	ENST00000474759	1.03895	1.12176	2.89064	2.8975	0.832469	0.891613	0.11063	0.00341636	0.0990208	non_target
CACNB1	ENSG00000067191	ENST00000394303	2.48804	2.97787	8.2126	10.9461	1.7197	1.9345	0.259274	0.414504	0.169805	non_target
CACNB2	ENSG00000165995	ENST00000324631	0.341063	0.447155	0.702363	0.420386	0.0998694	0.251534	0.390738	-0.740502	1.33264	non_target
CACNB3	ENSG00000167535	ENST00000301050	4.27347	3.74398	10.019	8.61509	6.0315	4.41837	-0.190834	-0.217807	-0.449004	non_target
CACNB4	ENSG00000182389	ENST00000539935	1.34127	1.46662	1.45888	1.21213	0.140089	0.235222	0.128892	-0.26732	0.747678	non_target
CACNG4	ENSG00000075461	ENST00000262138	0.119857	0.280387	0.310114	0.766021	0.327565	0.314292	1.22611	1.30459	-0.059677	non_target
CACNG5	ENSG00000075429	ENST00000533854	0.203029	0.241131	0.795471	0.441179	0.138718	0.153062	0.248133	-0.850445	0.141957	non_target
CACNG6	ENSG00000130433	ENST00000252729	0.154505	0.208524	0.51398	0.14812	0.0395867	0.15193	0.432558	-1.79495	1.94032	non_target
CACNG7	ENSG00000105605	ENST00000391767	0.133137	0.258746	0.354317	0.714754	0.382053	0.340388	0.958627	1.01241	-0.166592	non_target
CACNG8	ENSG00000142408	ENST00000270458	2.34845	2.75649	7.45852	8.40937	0.578648	0.708082	0.231125	0.173107	0.29123	A5_target
CACTIN	ENSG00000105298	ENST00000429344	14.5227	15.8311	37.6567	35.3902	19.3878	18.0718	0.124455	-0.0895573	-0.101408	non_target
CACUL1	ENSG00000151893	ENST00000369151	8.40603	9.95838	4.71815	4.62624	3.52977	5.4022	0.244486	-0.0283805	0.613973	A5_target
CACYBP	ENSG00000116161	ENST00000367679	116.256	108.713	28.3276	27.6474	83.7858	96.8515	-0.0967739	-0.0350616	0.209069	A5_target
CAD	ENSG00000084774	ENST00000264705	42.1627	46.2762	119.018	120.093	37.563	32.7083	0.1343	0.0129709	-0.199657	non_target
CADM1	ENSG00000182985	ENST00000331581	32.7476	34.176	44.1327	47.402	19.2731	24.0318	0.0615972	0.103099	0.318356	non_target
CADM4	ENSG00000105767	ENST00000222374	6.93184	6.31929	11.3122	8.65149	11.0584	9.13129	-0.133475	-0.386865	-0.276252	non_target
CADPS2	ENSG00000081803	ENST00000615869	2.07668	1.83452	2.14576	2.30757	0.72556	0.893404	-0.178877	0.104886	0.300219	non_target
CALB2	ENSG00000172137	ENST00000302628	0.443033	0.531492	0.327512	0.188766	1.26125	0.822895	0.262633	-0.79495	-0.61607	non_target
CALCB	ENSG00000175868	ENST00000523376	0.760756	0.650266	1.68716	0.607762	0.812158	1.27797	-0.226405	-1.47302	0.654019	non_target
CALCOCO1	ENSG00000012822	ENST00000550804	5.31418	6.59698	15.1162	18.0155	5.76203	5.2761	0.311961	0.253145	-0.127105	A5_target
CALCOCO2	ENSG00000136436	ENST00000448105	35.4137	34.8078	27.4222	29.3661	21.2099	27.3298	-0.0248966	0.0988054	0.36574	non_target
CALD1	ENSG00000122786	ENST00000361675	21.2252	19.447	52.9641	37.0263	2.45929	3.01977	-0.126236	-0.516467	0.296198	A5_target
CALHM2	ENSG00000138172	ENST00000260743	1.79497	1.57465	1.57573	1.86419	2.79773	1.5812	-0.18893	0.242525	-0.823237	non_target
CALHM5	ENSG00000178033	ENST00000368599	0.109698	0.0631687	0.14597	0.252395	0.0599604	0.0934875	-0.796261	0.790013	0.640763	non_target
CALM1	ENSG00000198668	ENST00000661807	234.316	220.236	65.1756	56.9531	130.839	171.216	-0.0893997	-0.194557	0.38802	non_target
CALM2	ENSG00000143933	ENST00000409563	162.019	165.999	51.9493	57.7447	141.754	139.118	0.0350166	0.152583	-0.0270831	non_target
CALM3	ENSG00000160014	ENST00000291295	218.066	217.612	120.577	96.8923	347.962	317.62	-0.00300553	-0.315498	-0.131627	non_target
CALML4	ENSG00000129007	ENST00000467889	2.103	1.95742	9.81031	16.1287	0.297281	0.499161	-0.103495	0.717256	0.747678	A5_target
CALR	ENSG00000179218	ENST00000316448	526.823	464.851	956.658	989.979	751.041	632.844	-0.180549	0.0493946	-0.247043	A5_target
CALU	ENSG00000128595	ENST00000542996	56.565	33.2162	34.9403	22.0872	31.2341	26.8866	-0.768022	-0.661683	-0.216232	non_target
CAMK1	ENSG00000134072	ENST00000256460	18.9158	15.2643	29.0594	27.0121	32.3101	21.2647	-0.309426	-0.105398	-0.603528	non_target
CAMK1D	ENSG00000183049	ENST00000619168	1.20271	1.17535	2.55049	1.75055	0.980694	1.15677	-0.0332059	-0.542971	0.238228	A5_target
CAMK2B	ENSG00000058404	ENST00000395749	0.314959	0.44208	0.663575	0.422719	0.403488	0.433595	0.489142	-0.65056	0.103822	non_target
CAMK2D	ENSG00000145349	ENST00000511664	4.10765	4.03427	4.88413	3.08388	1.81325	2.00743	-0.0260048	-0.663353	0.146774	A5_target
CAMK2G	ENSG00000148660	ENST00000423381	11.1929	11.4383	18.2644	16.867	10.6271	11.761	0.0312865	-0.11483	0.146253	A5_target
CAMK2N1	ENSG00000162545	ENST00000375078	3.47718	3.55496	5.93717	6.96193	2.74368	3.35871	0.0319179	0.229712	0.291795	A5_target
CAMK2N2	ENSG00000163888	ENST00000296238	0.837993	0.372557	2.18642	2.07928	0.80831	1.16333	-1.16948	-0.0724838	0.525286	A5_target
CAMK4	ENSG00000152495	ENST00000282356	1.18671	0.97715	0.438639	0.482647	0.294841	0.347724	-0.280322	0.137936	0.238004	A5_target
CAMKK1	ENSG00000004660	ENST00000381769	15.0372	16.3237	31.5387	32.0001	13.8219	14.4054	0.118439	0.0209549	0.0596566	non_target
CAMKK2	ENSG00000110931	ENST00000324774	12.1337	13.7357	13.8375	15.3461	14.8595	14.8609	0.178918	0.149294	0.000132426	A5_target
CAMKMT	ENSG00000143919	ENST00000378494	4.92311	4.59994	4.40928	3.81202	4.75443	5.07381	-0.0979567	-0.209987	0.0937975	non_target
CAMKV	ENSG00000164076	ENST00000477224	9.90774	8.71257	31.5562	22.7043	11.7934	6.62029	-0.185458	-0.474959	-0.833015	A5_target
CAMLG	ENSG00000164615	ENST00000297156	18.0008	17.6556	11.406	10.6196	13.3801	16.7606	-0.0279309	-0.103072	0.324987	A5_target
CAMSAP1	ENSG00000130559	ENST00000409386	10.9423	12.5561	21.3862	20.3095	9.03804	10.33	0.19848	-0.0745239	0.192761	non_target
CAMSAP2	ENSG00000118200	ENST00000236925	11.7642	13.3385	8.22376	8.93038	2.49943	2.64386	0.181194	0.118923	0.0810481	A5_target
CAMSAP3	ENSG00000076826	ENST00000446248	5.08677	5.54766	17.7004	17.0761	7.56535	5.82725	0.125129	-0.0518056	-0.376593	non_target
CAMTA1	ENSG00000171735	ENST00000303635	3.72766	4.10841	3.18843	2.90509	3.79387	3.96183	0.140309	-0.13426	0.0624949	non_target
CAMTA2	ENSG00000108509	ENST00000414043	11.417	13.6068	23.9018	27.5721	10.8696	9.29425	0.253142	0.206094	-0.225894	non_target
CAND1	ENSG00000111530	ENST00000545606	23.6511	23.7659	12.939	12.9178	6.52416	8.29391	0.00698651	-0.00237553	0.346261	non_target
CAND2	ENSG00000144712	ENST00000456430	6.22931	5.93154	15.3423	12.3638	7.07395	5.26362	-0.0706675	-0.311389	-0.426459	non_target
CANT1	ENSG00000171302	ENST00000302345	25.7822	26.6125	19.9877	23.5323	44.7721	36.4854	0.0457267	0.235525	-0.295284	A5_target
CANX	ENSG00000127022	ENST00000247461	400.118	366.505	284.494	257.713	158.155	223.503	-0.126593	-0.142635	0.498953	A5_target
CAP1	ENSG00000131236	ENST00000372797	69.8687	69.3893	49.0261	55.777	59.8172	73.0791	-0.00993337	0.186122	0.288897	non_target
CAP2	ENSG00000112186	ENST00000229922	5.13868	4.59711	4.39571	4.69172	1.70533	2.23778	-0.160672	0.0940189	0.392019	non_target
CAPG	ENSG00000042493	ENST00000263867	2.11861	1.79287	1.52385	0.878289	2.8168	2.02699	-0.240842	-0.79495	-0.474714	non_target
CAPN1	ENSG00000014216	ENST00000527323	23.3093	21.6611	42.2811	35.5756	39.9335	29.8541	-0.105794	-0.249126	-0.419673	A5_target
CAPN10	ENSG00000142330	ENST00000391984	6.30817	6.81093	23.4377	21.9907	7.30462	6.95493	0.11063	-0.0919315	-0.0707747	non_target
CAPN14	ENSG00000214711	ENST00000403897	0.0943757	0.163036	0.334882	0.14476	0.0193444	0.0371212	0.788702	-1.20999	0.940323	non_target
CAPN15	ENSG00000103326	ENST00000219611	15.1261	20.8849	52.7382	43.7415	22.6155	19.5249	0.46542	-0.269844	-0.211999	A5_target
CAPN2	ENSG00000162909	ENST00000295006	59.2201	61.5522	36.1702	35.9594	47.9656	56.895	0.0557238	-0.0084352	0.246301	A5_target
CAPN3	ENSG00000092529	ENST00000397163	0.453413	0.349679	1.96323	2.40106	0.177023	0.0212313	-0.374797	0.290442	-3.05968	non_target
CAPN5	ENSG00000149260	ENST00000456580	1.42894	1.79078	3.96128	3.4247	3.00739	1.90696	0.325643	-0.209987	-0.65724	non_target
CAPN6	ENSG00000077274	ENST00000324068	0.324233	0.196917	0.26965	0.543958	0.186916	0.278976	-0.719445	1.01241	0.577753	non_target
CAPN7	ENSG00000131375	ENST00000253693	15.4738	15.0008	10.2221	10.7312	3.12109	5.26082	-0.0447878	0.0701206	0.753237	non_target
CAPN9	ENSG00000135773	ENST00000271971	0.0833878	0.0600225	0.123289	0.106589	0.028487	0.0819981	-0.474333	-0.209987	1.52529	non_target
CAPNS1	ENSG00000126247	ENST00000587718	109.659	92.8042	78.1444	84.0308	196.239	160.369	-0.240759	0.104775	-0.291213	non_target
CAPRIN1	ENSG00000135387	ENST00000341394	102.429	102.338	72.2277	80.04	44.3796	67.0247	-0.00128655	0.148168	0.594796	A5_target
CAPRIN2	ENSG00000110888	ENST00000298892	3.64974	5.06396	8.31394	8.86598	0.880114	0.958127	0.472474	0.0927473	0.122526	non_target
CAPS	ENSG00000105519	ENST00000652433	0.777984	1.21332	5.55953	4.30924	0.531551	0.255006	0.641145	-0.367529	-1.05968	non_target
CAPZA1	ENSG00000116489	ENST00000263168	118.623	109.069	25.9171	26.8878	45.1386	66.4418	-0.121145	0.0530471	0.557729	A5_target
CAPZA2	ENSG00000198898	ENST00000361183	14.6171	13.9523	1.87925	2.22042	5.09484	7.84642	-0.0671572	0.240674	0.622998	A5_target
CAPZB	ENSG00000077549	ENST00000433834	99.9693	97.1008	50.5951	47.4964	132.76	141.341	-0.0420013	-0.0911798	0.0903619	non_target
CARD10	ENSG00000100065	ENST00000403299	4.14168	5.09181	11.7709	9.47583	6.5275	5.47584	0.297961	-0.312906	-0.253449	non_target
CARD19	ENSG00000165233	ENST00000375464	9.01989	8.65669	15.0029	16.0132	12.8391	11.2512	-0.0592951	0.0940189	-0.190464	A5_target
CARD6	ENSG00000132357	ENST00000254691	0.301329	0.382759	0.27517	0.543765	0.127162	0.296307	0.345095	0.982658	1.22043	non_target
CARD8	ENSG00000105483	ENST00000651546	5.14163	5.06928	4.86671	5.13705	1.20295	1.53058	-0.0204442	0.0779935	0.347498	A5_target
CARD9	ENSG00000187796	ENST00000371732	0.271244	0.292862	1.42868	2.73035	0.312737	0.0666809	0.11063	0.934403	-2.2296	A5_target
CARF	ENSG00000138380	ENST00000438828	0.296207	0.348889	0.418036	0.37862	0.0367966	0.088264	0.236161	-0.142873	1.26225	non_target
CARHSP1	ENSG00000153048	ENST00000396593	18.8989	20.4562	16.2616	19.3196	32.3379	33.5162	0.114237	0.248598	0.0516347	A5_target
CARM1	ENSG00000142453	ENST00000327064	54.5514	53.283	41.8524	36.3481	96.704	77.9905	-0.0339395	-0.20343	-0.310277	A5_target
CARMIL1	ENSG00000079691	ENST00000329474	4.04523	4.38172	8.62402	6.55515	1.6182	2.48934	0.115276	-0.395733	0.621373	A5_target
CARMIL2	ENSG00000159753	ENST00000334583	2.00511	1.17772	4.83815	5.41303	3.73182	1.89283	-0.767692	0.161982	-0.979335	A5_target
CARMIL3	ENSG00000186648	ENST00000342740	0.389924	0.370481	1.69492	1.19619	0.33568	0.199382	-0.0737946	-0.502769	-0.751555	non_target
CARNMT1	ENSG00000156017	ENST00000376834	9.91523	8.67324	3.31705	3.22218	2.44571	2.94152	-0.193074	-0.0418645	0.266309	non_target
CARS1	ENSG00000110619	ENST00000380525	27.1454	29.6731	44.0288	45.5784	28.3522	31.2354	0.12845	0.0499006	0.139719	A5_target
CARS2	ENSG00000134905	ENST00000257347	15.6155	11.5624	36.704	29.567	20.8329	14.8958	-0.433541	-0.31195	-0.483957	non_target
CASC3	ENSG00000108349	ENST00000264645	57.7564	57.8301	53.7819	64.2771	65.2455	65.388	0.00183973	0.257185	0.0031475	A5_target
CASC4	ENSG00000166734	ENST00000299957	12.4994	11.8233	5.35238	5.87055	3.34099	4.97666	-0.0802344	0.133314	0.574903	A5_target
CASD1	ENSG00000127995	ENST00000297273	2.87682	3.0078	1.0095	0.768028	0.597133	0.75198	0.064237	-0.394412	0.33264	non_target
CASK	ENSG00000147044	ENST00000645986	8.78161	8.31744	7.05742	6.8683	2.78018	3.98419	-0.0783468	-0.0391866	0.519107	non_target
CASKIN1	ENSG00000167971	ENST00000343516	1.15225	1.24409	14.4897	11.9394	1.67085	1.37412	0.11063	-0.279294	-0.282069	A5_target
CASKIN2	ENSG00000177303	ENST00000321617	5.89132	6.29865	14.3113	12.0413	9.83172	7.37953	0.096451	-0.249158	-0.413916	non_target
CASP10	ENSG00000003400	ENST00000286186	0.87132	1.10437	0.560106	1.54956	0.841217	1.00581	0.341955	1.46808	0.257805	A5_target
CASP2	ENSG00000106144	ENST00000310447	52.495	59.9673	31.4828	37.5888	52.8673	55.579	0.191996	0.255738	0.0721634	A5_target
CASP3	ENSG00000164305	ENST00000308394	14.342	16.0401	2.64057	3.42433	4.04903	8.06263	0.161444	0.374975	0.993672	non_target
CASP6	ENSG00000138794	ENST00000265164	10.907	6.76309	6.02296	4.7032	9.42739	9.08846	-0.689501	-0.356829	-0.0528233	A5_target
CASP7	ENSG00000165806	ENST00000369321	14.069	8.64226	5.99797	4.92362	7.86737	8.38133	-0.703042	-0.284755	0.0912989	non_target
CASP8	ENSG00000064012	ENST00000358485	4.03065	4.90576	4.82161	3.55962	2.65377	3.43501	0.283467	-0.437793	0.372274	A5_target
CASP9	ENSG00000132906	ENST00000546424	2.66219	2.77048	3.37883	3.50538	3.8296	3.53249	0.0575186	0.0530471	-0.116508	A5_target
CASS4	ENSG00000087589	ENST00000360314	0.0546579	0.029507	0.303043	1.25757	0.0280084	0.053747	-0.88937	2.05305	0.940323	non_target
CAST	ENSG00000153113	ENST00000508830	25.9348	27.7888	23.6319	22.4848	8.69617	12.5573	0.0996109	-0.07179	0.530071	non_target
CASTOR1	ENSG00000239282	ENST00000407689	1.0584	1.09514	1.66265	1.01466	1.2655	1.30096	0.0492294	-0.712488	0.0398587	non_target
CASTOR2	ENSG00000274070	ENST00000616305	3.86149	4.12154	7.68194	7.59016	4.81782	4.55309	0.094028	-0.0173422	-0.0815364	non_target
CASTOR3	ENSG00000239521	ENST00000436886	2.27844	2.99728	3.94948	3.91663	3.03294	2.85853	0.395607	-0.0120479	-0.0854401	A5_target
CASZ1	ENSG00000130940	ENST00000377022	1.57872	1.83116	5.50187	4.77391	1.79363	1.49031	0.214008	-0.204751	-0.267272	A5_target
CAT	ENSG00000121691	ENST00000241052	17.9952	18.1476	17.1829	13.897	12.167	14.2545	0.0121673	-0.306203	0.228448	A5_target
CATSPER2	ENSG00000166762	ENST00000381761	0.89723	0.792605	0.994914	2.81503	0.0417972	0.0401035	-0.178877	1.50051	-0.059677	non_target
CATSPER3	ENSG00000152705	ENST00000282611	0.21129	0.171097	0.820028	0.202558	0.162408	0.207769	-0.304408	-2.01734	0.355361	non_target
CAV1	ENSG00000105974	ENST00000341049	4.10912	6.5448	1.0341	2.45857	2.50885	6.13261	0.671518	1.24944	1.28947	non_target
CAV2	ENSG00000105971	ENST00000222693	4.50825	4.44884	1.82762	0.929446	1.86304	1.73988	-0.019138	-0.975522	-0.0986711	non_target
CAVIN1	ENSG00000177469	ENST00000357037	12.0293	13.6591	15.8734	17.2982	20.609	18.3347	0.183307	0.124014	-0.168696	A5_target
CAVIN4	ENSG00000170681	ENST00000307584	2.74931	2.51942	3.68911	3.1008	0.402524	0.272621	-0.125976	-0.250629	-0.562177	non_target
CBARP	ENSG00000099625	ENST00000382477	1.60481	2.11076	12.1655	9.28685	2.18298	1.8076	0.395359	-0.389537	-0.272222	A5_target
CBFA2T2	ENSG00000078699	ENST00000359606	4.26062	4.83392	5.91379	6.60317	3.22702	3.6768	0.182129	0.159075	0.188251	A5_target
CBFA2T3	ENSG00000129993	ENST00000268679	1.18226	1.34548	2.65738	1.83794	1.49	1.64957	0.186579	-0.531915	0.146774	A5_target
CBFB	ENSG00000067955	ENST00000412916	23.5967	21.5425	9.6683	9.11052	12.1035	17.6691	-0.131404	-0.0857292	0.545803	A5_target
CBL	ENSG00000110395	ENST00000264033	9.39543	10.8293	6.11172	7.52027	4.53208	7.02052	0.204907	0.299208	0.631404	A5_target
CBLB	ENSG00000114423	ENST00000651978	3.51619	3.64355	5.80926	6.24402	2.20086	2.34374	0.0513327	0.104121	0.0907399	A5_target
CBLL1	ENSG00000105879	ENST00000440859	12.5484	13.3741	7.68389	8.46733	5.13313	6.83163	0.0919338	0.14007	0.412391	A5_target
CBLN1	ENSG00000102924	ENST00000219197	5.45162	4.71522	4.87512	4.49575	8.23056	6.45598	-0.20936	-0.116878	-0.350354	A5_target
CBLN3	ENSG00000139899	ENST00000267406	0.520332	0.280901	0.576982	0.332551	0.325887	0.312681	-0.88937	-0.79495	-0.059677	non_target
CBR1	ENSG00000159228	ENST00000290349	60.4354	49.8987	49.0131	44.9869	84.4058	77.0819	-0.276393	-0.123662	-0.130949	A5_target
CBR3	ENSG00000159231	ENST00000290354	1.79295	1.16151	2.22673	1.37508	1.83753	1.69255	-0.626336	-0.695414	-0.118571	non_target
CBR4	ENSG00000145439	ENST00000306193	7.03261	5.59374	2.44561	2.9521	2.17503	2.43472	-0.330248	0.271546	0.162715	non_target
CBS	ENSG00000160200	ENST00000398165	42.6425	43.7568	84.2113	70.3812	49.8132	47.8758	0.0372163	-0.258825	-0.0572324	A5_target
CBSL	ENSG00000274276	ENST00000624934	5.92861	6.67268	7.57015	7.57811	9.05879	7.41976	0.170572	0.00151683	-0.287946	non_target
CBWD1	ENSG00000172785	ENST00000377400	10.6243	9.78924	5.75765	7.50491	5.28051	6.91249	-0.118104	0.382355	0.388527	non_target
CBWD2	ENSG00000136682	ENST00000259199	15.4745	14.8044	11.0341	10.8164	7.10655	11.6725	-0.0638678	-0.028747	0.715891	non_target
CBWD3	ENSG00000196873	ENST00000360171	0.231419	0.392641	0.513228	0.380322	0.0338818	0.130035	0.762707	-0.43238	1.94032	non_target
CBWD5	ENSG00000147996	ENST00000382405	4.9155	5.47986	3.45652	3.67793	1.92498	3.1045	0.1568	0.089573	0.689515	non_target
CBWD6	ENSG00000215126	ENST00000377391	2.43641	1.9406	1.50585	0.918969	0.245605	0.35348	-0.328254	-0.712488	0.525286	non_target
CBX1	ENSG00000108468	ENST00000393408	56.8281	58.5495	20.1858	18.0182	30.3169	44.1702	0.0430512	-0.163891	0.542952	non_target
CBX2	ENSG00000173894	ENST00000310942	33.5293	33.1291	60.1598	51.7736	47.0905	39.2513	-0.0173228	-0.216582	-0.262695	non_target
CBX3	ENSG00000122565	ENST00000337620	89.1654	87.4472	25.2125	19.6047	27.0597	40.2181	-0.0280714	-0.362939	0.571702	non_target
CBX4	ENSG00000141582	ENST00000269397	28.603	29.0338	73.9968	60.3311	36.4165	33.599	0.0215636	-0.294561	-0.116174	non_target
CBX5	ENSG00000094916	ENST00000209875	17.7851	14.4036	9.22489	8.15362	7.21724	7.39416	-0.30424	-0.178091	0.0349397	A5_target
CBX6	ENSG00000183741	ENST00000407418	34.3326	41.0273	70.2658	69.9315	47.6705	49.2625	0.257006	-0.00687909	0.0473954	A5_target
CBX7	ENSG00000100307	ENST00000216133	3.36022	3.77842	8.9966	8.87957	2.05199	2.29413	0.169225	-0.018891	0.160922	non_target
CBX8	ENSG00000141570	ENST00000269385	5.5703	5.39634	12.8612	12.509	8.30903	5.85264	-0.0457716	-0.0400623	-0.505594	A5_target
CBY1	ENSG00000100211	ENST00000619293	26.4403	21.7736	21.865	21.1127	42.2541	33.68	-0.28016	-0.0505091	-0.327199	non_target
CC2D1A	ENSG00000132024	ENST00000318003	16.6294	19.3359	59.8411	60.9327	18.2515	14.4458	0.217545	0.0260801	-0.337358	A5_target
CC2D1B	ENSG00000154222	ENST00000371586	8.4362	8.4648	18.1185	18.9723	9.63406	8.595	0.00488242	0.0664262	-0.164647	non_target
CC2D2A	ENSG00000048342	ENST00000424120	2.18173	2.44395	3.71962	3.60795	0.824517	1.04587	0.163741	-0.0439773	0.343082	A5_target
CCAR1	ENSG00000060339	ENST00000265872	39.4751	43.0526	32.3398	37.4753	10.2519	8.09888	0.125158	0.212631	-0.340102	A5_target
CCAR2	ENSG00000158941	ENST00000308511	30.8981	33.7429	47.6889	54.4633	47.3106	42.6815	0.127063	0.19163	-0.148552	non_target
CCDC102A	ENSG00000135736	ENST00000258214	5.62119	3.90843	11.0957	7.56134	8.92796	6.07737	-0.524284	-0.553289	-0.554885	non_target
CCDC106	ENSG00000173581	ENST00000586790	13.0291	10.4122	27.6818	27.4072	20.3976	14.5606	-0.323466	-0.0143808	-0.486329	A5_target
CCDC107	ENSG00000159884	ENST00000426546	6.34204	4.89107	8.53949	7.81705	9.45943	8.07385	-0.374797	-0.127525	-0.228496	A5_target
CCDC112	ENSG00000164221	ENST00000379611	6.56674	7.44623	1.39649	1.95472	1.1063	1.12045	0.181333	0.485158	0.0183255	non_target
CCDC113	ENSG00000103021	ENST00000219299	2.40301	2.31602	1.56566	1.40565	1.08528	1.77556	-0.0531949	-0.155539	0.710203	non_target
CCDC114	ENSG00000105479	ENST00000315396	0.200364	0.120185	0.987459	0.682962	0.0228162	0.13135	-0.737367	-0.531915	2.52529	non_target
CCDC115	ENSG00000136710	ENST00000259229	10.8839	11.2271	8.34498	8.84371	13.8498	14.4026	0.0447921	0.0837439	0.0564646	A5_target
CCDC116	ENSG00000161180	ENST00000292779	2.18156	2.07832	7.04378	6.88932	2.13717	2.01902	-0.0699423	-0.031989	-0.0820448	non_target
CCDC117	ENSG00000159873	ENST00000249064	30.4065	26.2015	6.64729	7.13167	18.9122	23.4546	-0.214729	0.101474	0.310558	A5_target
CCDC12	ENSG00000160799	ENST00000292314	47.7867	46.9601	42.9222	46.9587	52.437	57.0251	-0.0251748	0.129668	0.121012	non_target
CCDC120	ENSG00000147144	ENST00000603986	3.3857	4.59171	8.33274	6.09571	4.37966	3.75559	0.439578	-0.450995	-0.221782	A5_target
CCDC121	ENSG00000176714	ENST00000394775	2.72294	2.72996	4.20559	1.67812	0.797327	0.765019	0.00371472	-1.32546	-0.059677	A5_target
CCDC122	ENSG00000151773	ENST00000444614	1.80761	1.65142	0.848021	0.799802	0.498765	1.02547	-0.130378	-0.0844564	1.03986	non_target
CCDC124	ENSG00000007080	ENST00000597436	158.482	154.411	188.074	190.175	302.733	255.042	-0.0375355	0.0160279	-0.247313	non_target
CCDC125	ENSG00000183323	ENST00000396496	4.12769	3.8432	2.81667	3.46046	2.1066	1.84047	-0.103028	0.296973	-0.194837	A5_target
CCDC126	ENSG00000169193	ENST00000307471	3.24548	3.41029	1.2853	0.666718	0.89094	1.65269	0.0714593	-0.946953	0.891413	A5_target
CCDC127	ENSG00000164366	ENST00000296824	3.06869	3.18007	2.73591	4.3167	3.37415	3.56344	0.0514341	0.657909	0.0787477	A5_target
CCDC130	ENSG00000104957	ENST00000586600	15.9758	16.0026	38.6512	47.9815	12.442	12.4505	0.0024207	0.311965	0.000985813	non_target
CCDC134	ENSG00000100147	ENST00000255784	9.18633	9.55338	14.8735	20.9631	8.54835	7.81403	0.0565225	0.495108	-0.129579	non_target
CCDC136	ENSG00000128596	ENST00000297788	2.84882	3.71288	13.5705	14.9321	1.19205	1.27635	0.382176	0.137936	0.0985851	non_target
CCDC137	ENSG00000185298	ENST00000329214	34.1986	34.9323	67.0547	69.6972	41.0713	40.4485	0.0306243	0.0557615	-0.0220446	non_target
CCDC138	ENSG00000163006	ENST00000295124	16.0026	15.651	6.68354	5.31596	3.05771	4.5637	-0.032045	-0.330282	0.577753	non_target
CCDC14	ENSG00000175455	ENST00000488653	23.973	26.8877	34.6037	25.7559	1.55321	1.81204	0.165538	-0.426024	0.222358	A5_target
CCDC140	ENSG00000163081	ENST00000295226	0.126382	0.227425	0.280284	0.646181	0.388574	0.207127	0.847596	1.20505	-0.907674	non_target
CCDC142	ENSG00000135637	ENST00000393965	8.47866	10.5023	20.8031	26.3295	5.93514	6.30844	0.308796	0.339885	0.0880002	A5_target
CCDC146	ENSG00000135205	ENST00000285871	0.686772	0.579302	0.856736	0.576089	0.197957	0.0633119	-0.245514	-0.572557	-1.64464	non_target
CCDC15	ENSG00000149548	ENST00000529051	1.4957	1.96939	1.9417	3.42732	0.336487	0.358724	0.396934	0.81976	0.0923261	A5_target
CCDC150	ENSG00000144395	ENST00000389175	7.64098	8.42184	24.5802	19.839	0.795332	0.880505	0.140377	-0.309153	0.146774	A5_target
CCDC151	ENSG00000198003	ENST00000356392	0.775418	0.946421	4.48613	4.39558	1.48574	1.95597	0.287508	-0.029415	0.396701	A5_target
CCDC153	ENSG00000248712	ENST00000503566	0.11054	0.179025	0.122575	1.05971	0.169932	0.163046	0.695592	3.11194	-0.059677	non_target
CCDC157	ENSG00000187860	ENST00000405659	1.38365	1.39264	4.94094	7.55409	1.87471	1.42977	0.00934659	0.612475	-0.390883	non_target
CCDC159	ENSG00000183401	ENST00000588790	0.152502	0.493971	3.72033	1.94933	0.520981	0.449883	1.69559	-0.932453	-0.21168	non_target
CCDC163	ENSG00000280670	ENST00000629482	3.27979	2.43456	2.65188	3.14423	2.55601	3.22513	-0.429938	0.245692	0.335461	non_target
CCDC167	ENSG00000198937	ENST00000373408	58.561	57.8241	40.2385	34.0683	143.117	105.573	-0.0182678	-0.240149	-0.438964	non_target
CCDC17	ENSG00000159588	ENST00000528266	0.159409	0.137691	1.48482	2.32287	0.0653489	0.0313504	-0.211298	0.645623	-1.05968	A5_target
CCDC170	ENSG00000120262	ENST00000239374	0.0269787	0.0291289	0.14958	0.0517274	0.0276495	0.0265291	0.11063	-1.53192	-0.0596769	non_target
CCDC171	ENSG00000164989	ENST00000380701	0.436896	0.294823	0.847809	0.837679	0.0783578	0.139625	-0.567442	-0.0173422	0.833408	non_target
CCDC173	ENSG00000154479	ENST00000447353	0.398929	0.179468	0.0737269	0.637402	0.272565	0.0326901	-1.1524	3.11194	-3.05968	non_target
CCDC174	ENSG00000154781	ENST00000383794	8.83726	8.93702	12.526	15.0303	3.3683	5.48211	0.0161951	0.262949	0.702711	A5_target
CCDC177	ENSG00000267909	ENST00000599174	0.119804	0.0923947	0.303652	0.262521	0.210485	0.134637	-0.374797	-0.209987	-0.644639	non_target
CCDC18	ENSG00000122483	ENST00000343253	5.73537	5.49384	3.39189	2.81966	0.497367	0.260298	-0.0620722	-0.266571	-0.934146	A5_target
CCDC180	ENSG00000197816	ENST00000673941	1.4999	1.16539	4.8186	6.50418	0.430988	0.496228	-0.364051	0.432752	0.203357	A5_target
CCDC181	ENSG00000117477	ENST00000367806	4.61771	5.85824	1.4508	1.32806	1.30144	1.32439	0.343291	-0.127525	0.0252119	A5_target
CCDC183	ENSG00000213213	ENST00000338005	0.20855	0.540412	2.68257	0.959669	0.128241	0.24609	1.37366	-1.48301	0.940323	non_target
CCDC184	ENSG00000177875	ENST00000316554	1.31675	0.812394	2.22492	2.04376	1.79931	1.66474	-0.696725	-0.122524	-0.112144	non_target
CCDC186	ENSG00000165813	ENST00000648613	2.89495	3.7887	1.70775	1.86889	0.439545	0.536753	0.388164	0.130088	0.288246	non_target
CCDC187	ENSG00000260220	ENST00000638797	0.0282736	0.0152635	0.156759	0.21684	0.0144883	0.0139012	-0.88937	0.468085	-0.059677	non_target
CCDC189	ENSG00000196118	ENST00000541260	6.68527	5.90571	35.6659	37.1093	2.63519	2.3905	-0.178877	0.0572349	-0.140597	non_target
CCDC191	ENSG00000163617	ENST00000295878	1.15947	1.47047	3.30611	3.03472	0.132034	0.180976	0.342803	-0.123573	0.454896	A5_target
CCDC22	ENSG00000101997	ENST00000376227	9.72917	11.8093	22.3327	23.0503	16.6079	12.0654	0.279534	0.0456297	-0.460987	non_target
CCDC24	ENSG00000159214	ENST00000372318	1.0211	0.892488	4.96044	5.22081	1.49499	1.00409	-0.194225	0.0738057	-0.57425	non_target
CCDC25	ENSG00000147419	ENST00000356537	12.5704	13.274	5.07669	3.70797	4.75275	6.84994	0.0785687	-0.453258	0.52733	non_target
CCDC28A	ENSG00000024862	ENST00000611852	9.27377	9.49941	4.32432	3.10027	8.28584	9.77394	0.0346811	-0.480076	0.238291	non_target
CCDC28B	ENSG00000160050	ENST00000421922	12.9492	9.77592	13.3494	8.34065	20.4251	18.2047	-0.405554	-0.67854	-0.166029	non_target
CCDC3	ENSG00000151468	ENST00000378825	9.09337	6.58292	4.21827	3.79676	15.301	9.53112	-0.466089	-0.151884	-0.682909	non_target
CCDC30	ENSG00000186409	ENST00000657597	0.142754	0.1897	0.0974127	0.336871	0.0337622	0.0323942	0.41019	1.79001	-0.059677	non_target
CCDC32	ENSG00000128891	ENST00000559911	5.4976	4.68011	5.15827	1.62166	7.58462	7.79709	-0.232258	-1.66942	0.0398587	A5_target
CCDC34	ENSG00000109881	ENST00000328697	15.1825	15.0619	9.07364	4.91467	4.59726	5.08959	-0.0114984	-0.884587	0.146774	A5_target
CCDC40	ENSG00000141519	ENST00000397545	1.31865	1.51386	6.14502	6.08074	0.786914	0.590891	0.199167	-0.0151711	-0.413314	A5_target
CCDC43	ENSG00000180329	ENST00000588210	33.4153	27.6664	16.3572	13.544	12.4918	17.9444	-0.272374	-0.272272	0.522551	A5_target
CCDC47	ENSG00000108588	ENST00000225726	61.6112	57.9298	43.0318	45.9811	15.0596	22.4458	-0.0888869	0.095639	0.575764	non_target
CCDC50	ENSG00000152492	ENST00000392455	3.73259	3.84201	1.69238	2.41736	1.9042	1.94123	0.0416826	0.514378	0.0277859	A5_target
CCDC51	ENSG00000164051	ENST00000395694	22.0366	22.6416	24.7314	20.274	37.2917	32.3293	0.0390767	-0.286713	-0.206015	non_target
CCDC57	ENSG00000176155	ENST00000665763	7.42832	7.75448	44.5984	38.3213	1.61934	1.91693	0.0619951	-0.218847	0.243392	non_target
CCDC58	ENSG00000160124	ENST00000291458	52.6868	56.7786	15.8734	11.8173	22.9232	42.7178	0.107905	-0.425716	0.898031	non_target
CCDC59	ENSG00000133773	ENST00000256151	32.3779	34.9096	9.81447	8.83138	14.1617	16.6518	0.108616	-0.152272	0.233682	A5_target
CCDC6	ENSG00000108091	ENST00000263102	20.8337	16.1386	8.03787	5.70305	7.64665	9.13106	-0.368407	-0.495079	0.255954	A5_target
CCDC61	ENSG00000104983	ENST00000595358	1.4181	0.935684	8.38661	6.79744	1.49373	1.08458	-0.599863	-0.303097	-0.461775	A5_target
CCDC62	ENSG00000130783	ENST00000253079	0.32524	0.351162	0.0961733	0.748315	0.0444436	0.0426427	0.11063	2.95994	-0.059677	non_target
CCDC65	ENSG00000139537	ENST00000266984	0.412137	0.18541	0.38084	0.395104	0.351987	0.439041	-1.1524	0.0530471	0.318835	non_target
CCDC66	ENSG00000180376	ENST00000394672	11.9671	14.1292	11.0415	10.0713	1.42776	1.93134	0.239598	-0.132682	0.43585	non_target
CCDC69	ENSG00000198624	ENST00000355417	3.91785	3.25217	2.56927	1.777	7.14544	4.92962	-0.268658	-0.531915	-0.535547	non_target
CCDC71	ENSG00000177352	ENST00000321895	17.1043	13.8075	26.2341	23.9065	28.7519	21.1027	-0.308909	-0.134038	-0.446226	A5_target
CCDC71L	ENSG00000253276	ENST00000315965	4.08997	5.88792	11.5901	9.23598	7.21897	5.45179	0.525667	-0.327557	-0.405064	non_target
CCDC74A	ENSG00000163040	ENST00000295171	5.1953	4.15694	15.9454	11.9178	6.22773	5.70169	-0.321686	-0.420022	-0.127316	non_target
CCDC74B	ENSG00000152076	ENST00000310463	3.3269	2.84371	7.89059	5.67004	4.35673	2.86252	-0.226405	-0.476774	-0.605959	A5_target
CCDC77	ENSG00000120647	ENST00000239830	16.3377	15.8254	12.0086	12.8879	4.08231	6.48736	-0.0459604	0.101957	0.668243	non_target
CCDC78	ENSG00000162004	ENST00000345165	0.940591	0.870476	21.5553	16.6603	0.321326	0.264262	-0.111763	-0.371626	-0.282069	A5_target
CCDC8	ENSG00000169515	ENST00000307522	21.8749	21.9705	33.5519	32.0605	25.5923	26.143	0.00629326	-0.0655974	0.0307144	non_target
CCDC80	ENSG00000091986	ENST00000206423	0.742809	0.435199	2.15817	1.45734	0.371787	0.430331	-0.771314	-0.566473	0.210971	A5_target
CCDC81	ENSG00000149201	ENST00000445632	0.245211	0.0588344	0.362544	0.417915	0.0558463	0.080375	-2.0593	0.20505	0.525286	non_target
CCDC82	ENSG00000149231	ENST00000645439	3.60494	4.71114	1.97275	1.65168	0.403044	0.35909	0.386101	-0.256281	-0.166592	A5_target
CCDC84	ENSG00000186166	ENST00000334418	8.61862	10.538	27.0886	31.7364	5.9081	6.67897	0.290078	0.228455	0.176929	non_target
CCDC85B	ENSG00000175602	ENST00000312579	23.1892	21.5065	114.394	82.9382	49.7406	33.181	-0.108683	-0.463904	-0.584068	non_target
CCDC85C	ENSG00000205476	ENST00000380243	5.50939	2.82728	9.05601	6.18061	9.52576	3.75618	-0.962478	-0.551126	-1.34257	A5_target
CCDC86	ENSG00000110104	ENST00000227520	102.664	101.619	138.753	132.117	159.112	151.828	-0.0147528	-0.0707015	-0.0676039	non_target
CCDC87	ENSG00000182791	ENST00000333861	0.421318	0.374621	0.384743	0.570219	0.406394	0.706741	-0.169478	0.56762	0.798304	non_target
CCDC88A	ENSG00000115355	ENST00000436346	8.18435	7.99656	6.7394	4.41914	1.12841	0.801186	-0.0334876	-0.608853	-0.49408	A5_target
CCDC88B	ENSG00000168071	ENST00000356786	0.565749	1.01806	5.82304	5.67399	0.431145	0.356616	0.847596	-0.0374078	-0.273802	A5_target
CCDC88C	ENSG00000015133	ENST00000389857	3.1318	2.48723	7.24109	4.89139	2.28286	1.85338	-0.332451	-0.565963	-0.300685	A5_target
CCDC9	ENSG00000105321	ENST00000643617	11.7802	12.6833	25.1714	28.8043	18.7879	15.3909	0.106572	0.194496	-0.287723	non_target
CCDC90B	ENSG00000137500	ENST00000529689	4.63612	4.73608	1.97726	2.18807	1.9371	3.15613	0.0307766	0.146157	0.704256	A5_target
CCDC91	ENSG00000123106	ENST00000545336	6.16931	6.35053	2.02911	1.20292	1.5003	1.18245	0.0417681	-0.754308	-0.34347	non_target
CCDC92	ENSG00000119242	ENST00000238156	6.16357	6.43298	8.48632	5.21947	5.6325	5.9851	0.0617203	-0.701235	0.0875993	A5_target
CCDC93	ENSG00000125633	ENST00000376300	13.5754	16.2859	21.9528	21.8914	3.87543	5.04713	0.262633	-0.00404537	0.381106	A5_target
CCDC96	ENSG00000173013	ENST00000310085	0.764614	1.00502	1.25336	1.01984	1.02212	0.948012	0.394423	-0.29745	-0.108587	A5_target
CCDC97	ENSG00000142039	ENST00000269967	30.6809	31.2459	22.0292	28.9388	47.7716	42.4108	0.026323	0.393591	-0.17172	non_target
CCDC9B	ENSG00000188549	ENST00000559313	1.01843	1.38089	5.20009	5.72181	0.558287	0.745273	0.439253	0.137936	0.416761	non_target
CCHCR1	ENSG00000204536	ENST00000396268	17.2524	15.0221	39.8713	33.8674	20.1612	14.6807	-0.19971	-0.235453	-0.457662	non_target
CCIN	ENSG00000185972	ENST00000335119	0.147046	0.119074	0.570693	0.281937	0.0753509	0.180744	-0.304408	-1.01734	1.26225	non_target
CCKBR	ENSG00000110148	ENST00000525462	0.401728	0.144582	0.445465	0.513499	0.308787	0.230436	-1.47433	0.20505	-0.422247	non_target
CCL2	ENSG00000108691	ENST00000225831	0.482959	1.25148	1.2853	0.370399	0.494967	1.13978	1.37366	-1.79495	1.20336	non_target
CCL5	ENSG00000271503	ENST00000651122	3.14068	3.27201	6.10986	8.02901	5.53403	5.74323	0.0590996	0.394084	0.0535336	non_target
CCM2	ENSG00000136280	ENST00000381112	8.25713	7.72379	16.4557	10.9436	12.7521	11.5993	-0.0963325	-0.588499	-0.136699	A5_target
CCM2L	ENSG00000101331	ENST00000452892	0.247853	0.118936	0.2443	0.422417	0.366912	0.243723	-1.0593	0.790013	-0.590192	non_target
CCN1	ENSG00000142871	ENST00000451137	4.5873	4.54582	9.61602	11.5666	4.92677	4.57265	-0.0131054	0.266451	-0.107611	A5_target
CCN2	ENSG00000118523	ENST00000367976	1.07147	0.826336	1.22208	0.469573	0.878492	0.933205	-0.374797	-1.37991	0.0871644	non_target
CCN3	ENSG00000136999	ENST00000259526	0.697437	1.12953	0.51558	2.11727	0.208477	0.657239	0.695592	2.03794	1.65653	A5_target
CCNA2	ENSG00000145386	ENST00000618014	65.5097	62.9946	32.5186	30.7142	33.2808	47.9864	-0.0564801	-0.0823598	0.527936	A5_target
CCNB1	ENSG00000134057	ENST00000256442	81.3812	72.0229	57.3445	60.8721	93.8889	90.8822	-0.176239	0.0861245	-0.0469562	A5_target
CCNB1IP1	ENSG00000100814	ENST00000437553	30.226	31.3974	18.0765	20.5117	41.3759	45.794	0.0548567	0.18233	0.146369	non_target
CCNB2	ENSG00000157456	ENST00000288207	39.491	36.7698	19.3084	23.7944	39.9307	45.4076	-0.103003	0.301394	0.185436	non_target
CCNB3	ENSG00000147082	ENST00000376042	0.746679	0.723925	1.45318	0.993381	0.187407	0.224766	-0.0446483	-0.548789	0.262251	non_target
CCNC	ENSG00000112237	ENST00000520429	41.2559	36.5038	7.07778	4.84426	17.376	24.0272	-0.176554	-0.547022	0.46757	A5_target
CCND1	ENSG00000110092	ENST00000227507	29.0993	25.8934	25.3195	19.2346	16.9625	22.1707	-0.168402	-0.396548	0.386309	non_target
CCND2	ENSG00000118971	ENST00000261254	28.8591	29.8142	24.2025	25.109	15.4662	21.3215	0.0469754	0.0530471	0.463198	A5_target
CCND3	ENSG00000112576	ENST00000372991	27.9089	27.2052	16.216	19.4824	51.8932	46.1785	-0.0368454	0.264756	-0.168324	non_target
CCNDBP1	ENSG00000166946	ENST00000300213	5.88479	5.18857	5.14813	5.30972	5.53025	5.82676	-0.181653	0.0445856	0.0753498	non_target
CCNE1	ENSG00000105173	ENST00000262643	22.7104	20.6051	23.5583	23.4574	27.5172	25.5377	-0.140355	-0.00619207	-0.107705	A5_target
CCNE2	ENSG00000175305	ENST00000520509	8.23214	7.37979	3.19375	2.55508	1.65212	1.85994	-0.157688	-0.32188	0.170936	A5_target
CCNF	ENSG00000162063	ENST00000397066	25.3979	24.5356	29.4202	31.5992	37.5268	28.735	-0.0498348	0.103081	-0.385109	non_target
CCNG1	ENSG00000113328	ENST00000340828	98.6931	102.575	11.4309	8.64723	55.1656	68.5099	0.0556551	-0.402632	0.312542	non_target
CCNG2	ENSG00000138764	ENST00000316355	5.03677	3.39005	2.84334	1.50502	2.13184	2.21269	-0.571194	-0.917807	0.0537048	non_target
CCNH	ENSG00000134480	ENST00000651575	31.6157	33.2663	26.2934	24.9769	15.5259	16.9118	0.0734188	-0.0741038	0.123353	non_target
CCNI	ENSG00000118816	ENST00000237654	94.5333	87.0544	24.7393	22.6814	90.8485	96.5038	-0.118907	-0.12529	0.0871236	non_target
CCNI2	ENSG00000205089	ENST00000614847	0.0812731	0.146251	0.420567	0.623313	0.194352	0.0532791	0.847596	0.56762	-1.86703	non_target
CCNJ	ENSG00000107443	ENST00000465148	12.5649	13.4492	5.89389	5.4075	4.24301	5.84885	0.0981209	-0.124257	0.463063	A5_target
CCNJL	ENSG00000135083	ENST00000393977	1.29351	1.14056	1.91246	1.32272	2.01061	1.86554	-0.181551	-0.531915	-0.10804	non_target
CCNK	ENSG00000090061	ENST00000389879	7.6774	8.48665	1.98192	2.80385	9.13804	8.70784	0.144577	0.500506	-0.0695698	A5_target
CCNL1	ENSG00000163660	ENST00000295926	25.6865	31.6171	72.9858	66.3177	4.73054	6.15987	0.299693	-0.138222	0.380896	non_target
CCNL2	ENSG00000221978	ENST00000400809	44.2511	52.8934	207.854	184.329	13.6478	14.6553	0.257375	-0.173284	0.102753	A5_target
CCNO	ENSG00000152669	ENST00000282572	1.99841	2.49836	5.01511	6.45327	2.64096	1.75825	0.322134	0.363748	-0.586924	non_target
CCNQ	ENSG00000262919	ENST00000576892	29.5895	27.0754	31.0374	22.9999	50.2297	44.9364	-0.128101	-0.43238	-0.160655	A5_target
CCNT1	ENSG00000129315	ENST00000261900	14.9518	17.225	14.475	16.497	5.23032	6.99877	0.204184	0.188642	0.420203	A5_target
CCNT2	ENSG00000082258	ENST00000264157	10.8913	11.0781	9.01481	7.93253	1.24024	1.51544	0.0245365	-0.184517	0.289127	A5_target
CCNY	ENSG00000108100	ENST00000374704	10.2391	10.8721	5.79436	4.76578	11.145	11.4711	0.086551	-0.281937	0.0416064	A5_target
CCNYL1	ENSG00000163249	ENST00000295414	5.60512	5.12868	2.86539	1.89437	3.64142	4.20384	-0.128157	-0.59701	0.20721	non_target
CCP110	ENSG00000103540	ENST00000381396	10.9741	11.65	3.81825	4.3342	2.03387	2.76564	0.0862359	0.182854	0.443385	A5_target
CCPG1	ENSG00000260916	ENST00000442196	8.54002	7.34072	3.67759	2.78201	1.21088	1.50832	-0.218319	-0.402632	0.316886	non_target
CCR10	ENSG00000184451	ENST00000332438	0.403691	0.348692	0.895285	1.85763	0.248237	0.833624	-0.211298	1.05305	1.74768	non_target
CCS	ENSG00000173992	ENST00000533244	16.6515	14.2089	43.7784	44.0278	19.9556	13.0728	-0.228857	0.0081929	-0.610229	non_target
CCSAP	ENSG00000154429	ENST00000284617	12.567	11.6578	6.29825	6.89189	3.89478	5.69313	-0.108354	0.129949	0.54768	A5_target
CCSER1	ENSG00000184305	ENST00000509176	0.428443	0.436156	1.46599	1.03271	0.163093	0.180559	0.025741	-0.505443	0.146774	A5_target
CCSER2	ENSG00000107771	ENST00000372088	3.79711	4.60463	2.17785	2.51046	0.824311	1.05761	0.278184	0.20505	0.359548	A5_target
CCT2	ENSG00000166226	ENST00000299300	242.292	234.176	109.606	129.211	175.767	214.965	-0.0491545	0.237399	0.290444	non_target
CCT3	ENSG00000163468	ENST00000295688	547.688	524.574	561.471	631.812	732.428	720.371	-0.0622067	0.170285	-0.0239461	non_target
CCT4	ENSG00000115484	ENST00000394440	283.918	275.745	184.254	225.487	297.893	322.05	-0.0421387	0.291343	0.112489	non_target
CCT5	ENSG00000150753	ENST00000280326	231.829	218.014	157.336	177.448	174.041	214.244	-0.0886388	0.173548	0.299833	non_target
CCT6A	ENSG00000146731	ENST00000275603	268.903	262.312	127.036	134.79	132.088	196.845	-0.0358028	0.0854686	0.575559	non_target
CCT6B	ENSG00000132141	ENST00000314144	0.116255	0.167361	0.0859416	0.297201	0.158861	0.419166	0.525667	1.79001	1.39975	non_target
CCT7	ENSG00000135624	ENST00000258091	580.385	552.961	456.264	511.038	825.482	779.534	-0.0698332	0.163562	-0.0826251	non_target
CCT8	ENSG00000156261	ENST00000286788	230.861	220.166	98.8877	93.413	99.8233	133.399	-0.0684313	-0.0821682	0.418297	non_target
CCZ1	ENSG00000122674	ENST00000325974	5.71633	5.87957	1.7348	1.96129	3.82342	4.99979	0.0406202	0.177036	0.387006	non_target
CCZ1B	ENSG00000146574	ENST00000316731	4.61451	4.07154	1.26547	0.475677	3.45794	3.75694	-0.180601	-1.41162	0.119647	non_target
CD101	ENSG00000134256	ENST00000369470	0.904371	1.06944	2.81748	2.72484	0.595836	0.402302	0.241874	-0.0482362	-0.566637	non_target
CD109	ENSG00000156535	ENST00000287097	0.855946	0.513425	0.66791	0.60783	0.194939	0.28056	-0.737367	-0.135987	0.525286	non_target
CD151	ENSG00000177697	ENST00000322008	91.3096	79.5798	121.439	98.4167	156.916	130.104	-0.198364	-0.303259	-0.270331	non_target
CD164	ENSG00000135535	ENST00000310786	81.9315	85.1348	16.9772	14.3595	31.2605	45.7947	0.0553312	-0.241597	0.55084	non_target
CD164L2	ENSG00000174950	ENST00000374030	0.22698	0.653522	2.68472	0.580265	0.155083	0.223198	1.52567	-2.20999	0.525286	non_target
CD19	ENSG00000177455	ENST00000324662	0.335156	0.643321	0.991056	0.571208	1.18313	0.768999	0.940705	-0.79495	-0.621556	A5_target
CD1D	ENSG00000158473	ENST00000673723	0.264811	0.183803	0.419487	0.145066	0.348936	0.502195	-0.5268	-1.53192	0.525286	non_target
CD207	ENSG00000116031	ENST00000410009	1.074	0.911113	1.70133	1.61796	0.668285	0.603487	-0.237293	-0.0724838	-0.14714	non_target
CD274	ENSG00000120217	ENST00000381577	0.0590874	0.148859	0.174721	0.226581	0.040371	0.0581027	1.33302	0.374975	0.525286	non_target
CD276	ENSG00000103855	ENST00000318443	36.8191	31.0992	34.4446	32.486	55.7669	40.4561	-0.243575	-0.0844564	-0.463051	non_target
CD2AP	ENSG00000198087	ENST00000359314	14.746	16.6495	5.63136	6.54214	2.9141	2.57494	0.175154	0.216277	-0.178513	A5_target
CD2BP2	ENSG00000169217	ENST00000305596	60.4369	59.4595	87.5139	83.9484	97.1216	89.1027	-0.0235224	-0.0600099	-0.124323	non_target
CD302	ENSG00000241399	ENST00000259053	2.05695	2.65327	0.242219	0.488621	1.24993	1.61097	0.367267	1.01241	0.366087	non_target
CD320	ENSG00000167775	ENST00000301458	72.3742	69.3845	79.8104	76.0092	152.387	107.286	-0.0608616	-0.0704034	-0.50628	non_target
CD3EAP	ENSG00000117877	ENST00000589804	29.7249	29.4336	46.3191	48.8938	40.5652	35.9601	-0.0142108	0.0780449	-0.173848	non_target
CD40	ENSG00000101017	ENST00000372285	10	11.0727	11.9853	13.3806	11.2517	13.0972	0.147002	0.15888	0.219115	non_target
CD46	ENSG00000117335	ENST00000322875	41.7045	41.7042	18.5464	13.5642	10.3385	15.5664	-8.67e-06	-0.451338	0.590411	A5_target
CD47	ENSG00000196776	ENST00000361309	23.4497	20.3271	8.77052	4.05824	17.9817	19.5535	-0.206167	-1.11181	0.120895	non_target
CD55	ENSG00000196352	ENST00000367067	26.6802	20.5043	21.6181	21.4449	16.1594	17.6432	-0.379846	-0.0116058	0.126736	A5_target
CD58	ENSG00000116815	ENST00000369489	9.68826	8.39679	1.16931	2.02184	2.49917	4.99023	-0.206399	0.790013	0.997656	non_target
CD59	ENSG00000085063	ENST00000651785	8.55299	8.38423	6.41184	6.46721	7.85394	9.58591	-0.0287505	0.0124051	0.287499	A5_target
CD63	ENSG00000135404	ENST00000549117	125.792	128.736	91.404	112.19	239.278	229.811	0.0333669	0.295617	-0.0582429	non_target
CD68	ENSG00000129226	ENST00000250092	2.93854	4.80444	2.32748	5.47321	3.95811	5.69658	0.709267	1.23362	0.525286	non_target
CD70	ENSG00000125726	ENST00000423145	0.406212	0.614021	3.6035	3.73846	0.666098	0.639107	0.596057	0.0530471	-0.059677	non_target
CD74	ENSG00000019582	ENST00000009530	0.0462966	0.0249932	0.205348	0.0887663	0.0237238	0.045525	-0.88937	-1.20999	0.940323	non_target
CD81	ENSG00000110651	ENST00000381036	229.12	212.956	111.294	122.574	404.531	333.433	-0.105545	0.139272	-0.278852	non_target
CD82	ENSG00000085117	ENST00000227155	2.6533	1.81668	3.65978	2.60568	5.00744	2.73636	-0.546482	-0.490095	-0.871817	non_target
CD83	ENSG00000112149	ENST00000379153	7.65552	7.66814	5.72752	6.01277	7.6253	9.37213	0.00237703	0.0701206	0.297584	A5_target
CD8A	ENSG00000153563	ENST00000409511	0.399202	0.354956	0.260391	0.360191	0.625724	0.508004	-0.169478	0.468085	-0.300685	non_target
CD9	ENSG00000010278	ENST00000382519	32.6385	21.3792	27.53	14.8611	46.7927	25.0087	-0.610365	-0.889467	-0.903852	non_target
CD99	ENSG00000002586	ENST00000381192	117.156	113.694	108.26	95.2971	216.034	190.074	-0.0432828	-0.183992	-0.184695	non_target
CD99L2	ENSG00000102181	ENST00000613030	8.89421	7.95093	9.7565	11.8089	14.2513	12.1315	-0.161742	0.27544	-0.232333	non_target
CDA	ENSG00000158825	ENST00000375071	5.13142	4.48963	3.53178	3.05339	7.70717	4.95891	-0.192762	-0.209987	-0.636178	non_target
CDADC1	ENSG00000102543	ENST00000251108	4.60816	4.13098	2.2971	1.378	2.16639	3.05556	-0.157709	-0.737234	0.496139	non_target
CDAN1	ENSG00000140326	ENST00000356231	4.44171	4.76252	11.4185	11.7283	5.7335	4.1561	0.100611	0.0386201	-0.464184	A5_target
CDC123	ENSG00000151465	ENST00000281141	158.753	161.929	59.7205	68.5644	92.7338	149.714	0.0285732	0.199233	0.691045	non_target
CDC14A	ENSG00000079335	ENST00000644676	2.45094	3.33661	3.3086	3.95012	0.582464	1.25744	0.445049	0.255676	1.11025	non_target
CDC14B	ENSG00000081377	ENST00000375241	12.0611	11.5877	7.14048	6.56522	5.7222	7.23668	-0.0577676	-0.121178	0.338759	non_target
CDC16	ENSG00000130177	ENST00000356221	20.1428	18.1014	14.7089	13.423	12.3358	14.1911	-0.154165	-0.131985	0.20213	A5_target
CDC20	ENSG00000117399	ENST00000372462	100.051	92.1085	125.058	124.181	164.417	140.763	-0.119333	-0.0101467	-0.224089	non_target
CDC23	ENSG00000094880	ENST00000394886	41.1216	40.2058	25.9406	22.6896	29.337	32.8658	-0.032495	-0.193179	0.163866	A5_target
CDC25A	ENSG00000164045	ENST00000302506	55.2636	62.1609	48.4378	57.9776	76.9416	84.0955	0.169679	0.259361	0.128264	non_target
CDC25B	ENSG00000101224	ENST00000245960	36.7324	38.4139	42.4968	44.6378	57.3047	49.5627	0.0645741	0.0709136	-0.2094	non_target
CDC25C	ENSG00000158402	ENST00000323760	8.75445	9.9691	11.3761	14.0314	9.46278	10.1554	0.187446	0.302661	0.101912	A5_target
CDC26	ENSG00000176386	ENST00000374206	35.2531	33.4491	12.9393	6.93254	32.6767	40.726	-0.0757832	-0.900303	0.31769	A5_target
CDC27	ENSG00000004897	ENST00000531206	29.8283	30.8435	17.9869	18.5741	7.57323	9.63678	0.0482815	0.0463525	0.347643	A5_target
CDC34	ENSG00000099804	ENST00000215574	52.6461	57.1145	66.2698	86.3269	103.461	97.7303	0.117529	0.381459	-0.0822139	non_target
CDC37	ENSG00000105401	ENST00000222005	218.705	218.846	410.766	374.888	290.696	270.261	0.000928637	-0.131858	-0.105161	non_target
CDC37L1	ENSG00000106993	ENST00000381854	2.59713	3.11324	1.36058	1.80363	1.19462	1.36742	0.261497	0.406684	0.194896	A5_target
CDC40	ENSG00000168438	ENST00000368932	15.8145	15.5226	8.23335	7.88573	4.77464	6.20962	-0.0268736	-0.0622337	0.379115	A5_target
CDC42	ENSG00000070831	ENST00000648594	35.3483	32.4925	15.0227	17.1703	33.0502	39.1556	-0.121535	0.192772	0.244559	non_target
CDC42BPA	ENSG00000143776	ENST00000334218	9.90912	10.0583	10.009	8.9376	2.3742	2.34745	0.0215595	-0.163337	-0.0163495	A5_target
CDC42BPB	ENSG00000198752	ENST00000361246	17.7472	20.3134	33.7461	36.7745	15.0481	15.3844	0.194839	0.123987	0.0318903	A5_target
CDC42BPG	ENSG00000171219	ENST00000342711	2.35832	2.10727	8.4507	6.05864	2.44077	1.59932	-0.162389	-0.480076	-0.609874	A5_target
CDC42EP1	ENSG00000128283	ENST00000249014	60.4451	60.2977	63.1094	59.7997	114.71	89.0256	-0.00352238	-0.0777148	-0.365694	non_target
CDC42EP2	ENSG00000149798	ENST00000279249	11.923	11.3773	18.5176	20.2738	17.7126	16.5288	-0.0675912	0.130718	-0.0997973	A5_target
CDC42EP3	ENSG00000163171	ENST00000611976	3.11497	3.00127	1.79676	2.67823	1.00211	2.12903	-0.0536454	0.575888	1.08716	A5_target
CDC42EP4	ENSG00000179604	ENST00000335793	10.8355	12.1731	10.145	8.15068	17.8058	15.7893	0.167923	-0.315782	-0.173397	non_target
CDC42SE1	ENSG00000197622	ENST00000439374	28.1346	29.2281	25.0489	24.4806	32.462	32.9776	0.0550114	-0.0331095	0.0227334	A5_target
CDC42SE2	ENSG00000158985	ENST00000505065	5.6082	6.05518	0.984793	0.756798	2.76426	3.71962	0.11063	-0.379912	0.428261	non_target
CDC45	ENSG00000093009	ENST00000437685	63.3876	59.0035	78.1413	76.0343	65.9904	64.709	-0.103401	-0.0394338	-0.0282878	non_target
CDC5L	ENSG00000096401	ENST00000371477	30.0702	29.7551	24.9254	24.8914	5.5947	7.02577	-0.0152011	-0.00196697	0.328594	non_target
CDC6	ENSG00000094804	ENST00000209728	57.7426	57.8576	33.9797	43.7798	47.9437	58.0449	0.00287054	0.365593	0.275826	A5_target
CDC7	ENSG00000097046	ENST00000428239	37.5048	35.3155	23.2376	22.7824	8.65724	9.98473	-0.0867718	-0.0285404	0.205815	non_target
CDC73	ENSG00000134371	ENST00000367435	15.0689	13.9029	11.2198	13.6263	4.09855	6.25405	-0.11619	0.280338	0.609678	A5_target
CDCA2	ENSG00000184661	ENST00000330560	8.50024	8.40181	9.28908	9.3693	1.93591	2.84676	-0.016803	0.0124051	0.556312	non_target
CDCA3	ENSG00000111665	ENST00000538862	19.3763	20.0058	18.5448	21.4713	24.1242	23.69	0.0461255	0.211392	-0.0262023	non_target
CDCA4	ENSG00000170779	ENST00000336219	33.5944	37.3452	29.7626	41.5959	53.3975	56.2364	0.152701	0.482938	0.0747321	A5_target
CDCA5	ENSG00000146670	ENST00000404147	42.5062	48.0321	51.918	51.8013	55.6679	62.4533	0.176325	-0.00324585	0.165932	non_target
CDCA7	ENSG00000144354	ENST00000306721	52.457	53.7169	52.2828	44.1634	28.597	39.4725	0.0342405	-0.243484	0.464985	non_target
CDCA7L	ENSG00000164649	ENST00000406877	14.7469	14.5819	11.9477	11.9002	11.9585	15.5265	-0.0162264	-0.00575422	0.376689	non_target
CDCA8	ENSG00000134690	ENST00000373055	38.3079	42.0781	26.7793	28.5926	46.6236	49.8995	0.135427	0.0945238	0.0979633	A5_target
CDCP2	ENSG00000157211	ENST00000530059	0.0882002	0.333304	0.195606	0.33822	0.0451966	0.0433652	1.91798	0.790013	-0.059677	non_target
CDH1	ENSG00000039068	ENST00000611625	0.557571	0.53864	0.943683	0.84399	0.406019	0.331853	-0.0498347	-0.161078	-0.291003	non_target
CDH11	ENSG00000140937	ENST00000268603	0.415264	0.310403	0.283369	0.571633	0.13095	0.188466	-0.419885	1.01241	0.525286	non_target
CDH12	ENSG00000154162	ENST00000382254	0.0672377	0.145193	0.111837	0.128918	0.0689094	0.0495879	1.11063	0.20505	-0.474714	non_target
CDH15	ENSG00000129910	ENST00000289746	0.998946	0.862849	2.38156	1.24496	1.30532	0.638494	-0.211298	-0.935812	-1.03166	non_target
CDH2	ENSG00000170558	ENST00000269141	14.7034	12.9889	15.4544	12.4384	5.27872	7.76372	-0.178877	-0.313217	0.55656	A5_target
CDH23	ENSG00000107736	ENST00000224721	0.816121	0.790968	3.1781	2.75993	1.08009	0.73933	-0.0451648	-0.203532	-0.546864	A5_target
CDH24	ENSG00000139880	ENST00000397359	5.86379	7.02734	28.1985	27.972	5.61721	4.9933	0.261145	-0.0116376	-0.16986	A5_target
CDH26	ENSG00000124215	ENST00000348616	0.606564	0.587736	0.896803	1.55065	0.0318792	0.168231	-0.0454893	0.790013	2.39975	non_target
CDH3	ENSG00000062038	ENST00000264012	1.43085	1.09357	2.99498	2.466	1.86186	1.47024	-0.387824	-0.280377	-0.340697	non_target
CDH4	ENSG00000179242	ENST00000614565	0.600205	0.775335	1.85404	1.8495	1.10943	1.01178	0.369364	-0.0035364	-0.132926	A5_target
CDH7	ENSG00000081138	ENST00000397968	0.595668	0.783233	0.706299	0.452316	0.223641	0.388561	0.394933	-0.642947	0.796959	A5_target
CDHR1	ENSG00000148600	ENST00000623527	1.69647	1.69683	4.2009	2.15517	1.26932	0.880155	0.000306507	-0.962894	-0.52823	A5_target
CDHR2	ENSG00000074276	ENST00000510636	0.0158737	0.0685553	0.281631	0.121741	0.0488051	0.0624366	2.11063	-1.20999	0.355361	A5_target
CDHR3	ENSG00000128536	ENST00000317716	0.222005	0.251684	0.443116	0.893886	0.045505	0.0545764	0.181019	1.01241	0.262251	non_target
CDIP1	ENSG00000089486	ENST00000399599	17.5784	18.1319	10.8144	16.2362	29.5952	28.0217	0.0447237	0.586266	-0.0788175	non_target
CDIPT	ENSG00000103502	ENST00000561555	43.293	35.0128	35.4071	34.507	60.6467	57.2106	-0.306251	-0.0371507	-0.0841473	non_target
CDK1	ENSG00000170312	ENST00000448257	53.7911	52.564	11.4895	10.2854	18.5268	27.459	-0.0332933	-0.159714	0.567664	non_target
CDK10	ENSG00000185324	ENST00000353379	13.286	15.0447	86.5087	80.1495	8.63478	7.12978	0.179343	-0.110152	-0.276301	A5_target
CDK11A	ENSG00000008128	ENST00000378633	10.3081	12.6388	34.937	34.9502	3.93928	5.84128	0.294076	0.000546788	0.568354	non_target
CDK11B	ENSG00000248333	ENST00000407249	26.2021	27.1934	44.4716	43.0614	15.5093	18.5879	0.0535752	-0.0464885	0.261231	non_target
CDK12	ENSG00000167258	ENST00000447079	27.3101	29.6172	37.0258	41.8968	11.5869	15.3469	0.117003	0.178308	0.405454	A5_target
CDK13	ENSG00000065883	ENST00000181839	9.0398	9.75216	16.5817	16.223	3.45785	4.16009	0.10943	-0.0315489	0.266743	A5_target
CDK14	ENSG00000058091	ENST00000380050	3.58495	2.36126	2.67064	1.96388	1.44694	1.94635	-0.602398	-0.443477	0.427769	A5_target
CDK16	ENSG00000102225	ENST00000276052	106.507	106.848	192.26	165.899	126.254	113.6	0.00460463	-0.212754	-0.15236	non_target
CDK17	ENSG00000059758	ENST00000261211	5.63942	6.35694	6.01742	6.12039	1.72662	2.51114	0.172786	0.024478	0.540392	A5_target
CDK18	ENSG00000117266	ENST00000506784	8.5502	8.6186	16.8141	13.576	11.5696	9.16309	0.0114967	-0.308615	-0.336435	A5_target
CDK19	ENSG00000155111	ENST00000368911	2.76276	2.40327	1.83565	1.84435	0.756582	0.813916	-0.201113	0.00682411	0.105382	non_target
CDK2	ENSG00000123374	ENST00000553376	75.6823	79.3845	38.3722	35.6407	71.2279	86.7021	0.0689028	-0.106536	0.283625	A5_target
CDK20	ENSG00000156345	ENST00000325303	7.60171	8.81158	17.3695	15.5215	7.82444	7.83098	0.213077	-0.162291	0.00120527	non_target
CDK2AP1	ENSG00000111328	ENST00000261692	65.1934	58.4472	26.7702	21.2068	66.2694	73.9897	-0.157591	-0.336096	0.158982	non_target
CDK2AP2	ENSG00000167797	ENST00000301488	30.9048	30.9004	28.7979	34.0592	52.4338	47.4489	-0.000207428	0.242081	-0.144122	non_target
CDK3	ENSG00000250506	ENST00000425876	3.34799	4.05446	11.3381	12.318	1.25193	1.2012	0.276216	0.119581	-0.059677	non_target
CDK4	ENSG00000135446	ENST00000257904	118.434	123.232	61.6212	59.0137	234.261	214.164	0.0572965	-0.0623747	-0.1294	non_target
CDK5	ENSG00000164885	ENST00000485972	32.5339	29.6856	26.5972	23.4837	53.2177	42.781	-0.132179	-0.179614	-0.314934	non_target
CDK5R1	ENSG00000176749	ENST00000313401	4.65923	6.16587	7.67938	6.88249	4.71934	5.45512	0.404213	-0.158059	0.209026	A5_target
CDK5R2	ENSG00000171450	ENST00000302625	0.143724	0.248286	0.318743	0.110227	0.147297	0.39572	0.788702	-1.53192	1.42575	non_target
CDK5RAP1	ENSG00000101391	ENST00000357886	26.8239	23.8193	27.9472	29.1715	31.2196	25.206	-0.171385	0.0618556	-0.308682	non_target
CDK5RAP2	ENSG00000136861	ENST00000349780	16.435	15.8972	31.813	33.2952	5.20258	5.45481	-0.0479975	0.0656974	0.0682999	A5_target
CDK5RAP3	ENSG00000108465	ENST00000536708	23.4112	26.6074	126.907	91.4422	17.5307	14.4327	0.184631	-0.472839	-0.280542	non_target
CDK6	ENSG00000105810	ENST00000265734	8.80813	7.06105	4.88013	4.01818	2.14781	1.50316	-0.318951	-0.280377	-0.514872	A5_target
CDK7	ENSG00000134058	ENST00000256443	19.826	18.6965	8.79382	8.08383	10.8025	13.03	-0.0846264	-0.121451	0.270472	A5_target
CDK8	ENSG00000132964	ENST00000381527	12.2599	13.3883	10.8757	9.67121	4.54724	8.17484	0.127024	-0.169345	0.846201	non_target
CDK9	ENSG00000136807	ENST00000373264	18.9962	19.4209	26.786	25.9764	29.0108	25.5392	0.0318975	-0.0442768	-0.183873	non_target
CDKAL1	ENSG00000145996	ENST00000274695	6.29996	7.15633	7.56801	8.22054	3.587	5.72174	0.183879	0.11932	0.673677	A5_target
CDKL1	ENSG00000100490	ENST00000395834	1.25003	1.30612	1.6097	0.309257	0.909177	0.515472	0.0633242	-2.37991	-0.818669	non_target
CDKL2	ENSG00000138769	ENST00000307465	0.493117	0.297528	0.450309	0.667393	0.0891843	0.142617	-0.728905	0.56762	0.677289	non_target
CDKL3	ENSG00000006837	ENST00000265334	0.386541	0.486906	0.0714375	0.123522	0.0990379	0.1267	0.333022	0.790013	0.355361	non_target
CDKL5	ENSG00000008086	ENST00000379989	0.434035	0.669468	1.32928	1.03034	0.0211822	0.0609717	0.625203	-0.367529	1.52529	non_target
CDKN1A	ENSG00000124762	ENST00000405375	4.92529	6.51093	7.63212	9.08024	9.38363	9.81059	0.402657	0.250647	0.0641947	A5_target
CDKN1B	ENSG00000111276	ENST00000396340	15.5597	15.6798	19.6427	18.0529	6.86928	12.7895	0.0110942	-0.12176	0.896734	non_target
CDKN1C	ENSG00000129757	ENST00000414822	0.702436	0.598752	5.3294	1.843	0.719901	0.43625	-0.230407	-1.53192	-0.722642	non_target
CDKN2A	ENSG00000147889	ENST00000498124	49.5328	41.5374	101.554	89.8251	90.1088	64.9431	-0.253972	-0.177053	-0.472492	non_target
CDKN2AIP	ENSG00000168564	ENST00000504169	4.91039	5.3672	3.89889	2.47964	1.92601	3.67606	0.128332	-0.652931	0.932546	A5_target
CDKN2AIPNL	ENSG00000237190	ENST00000458198	28.6181	25.1094	9.69467	8.71674	52.2678	44.3038	-0.188704	-0.153404	-0.238492	A5_target
CDKN2B	ENSG00000147883	ENST00000276925	1.07743	1.765	1.27712	0.854811	0.913832	0.931603	0.712081	-0.579221	0.0277859	A5_target
CDKN2C	ENSG00000123080	ENST00000262662	13.4079	11.0969	15.0316	14.0824	17.505	14.2993	-0.272929	-0.0941066	-0.291817	non_target
CDKN2D	ENSG00000129355	ENST00000393599	2.81275	3.57924	2.78481	4.23736	2.98564	4.69211	0.347669	0.605588	0.652198	non_target
CDKN3	ENSG00000100526	ENST00000335183	29.5319	27.6587	12.0796	3.91627	18.8401	25.0227	-0.0945423	-1.62502	0.409437	non_target
CDNF	ENSG00000185267	ENST00000465530	1.23582	1.05633	1.14197	0.987286	0.422182	0.911418	-0.226405	-0.209987	1.11025	A5_target
CDON	ENSG00000064309	ENST00000392693	3.84582	4.28764	5.19386	6.21737	2.4644	2.88058	0.156893	0.259498	0.225123	A5_target
CDPF1	ENSG00000205643	ENST00000314567	7.21033	6.33179	9.06138	9.76942	9.45869	6.99563	-0.187451	0.108542	-0.435186	non_target
CDR2	ENSG00000140743	ENST00000268383	18.2113	17.7764	12.9148	14.515	9.52193	14.9665	-0.0348641	0.168524	0.652414	non_target
CDR2L	ENSG00000109089	ENST00000337231	10.9305	12.0858	14.814	13.4283	18.4422	16.2419	0.14495	-0.141681	-0.183291	non_target
CDS1	ENSG00000163624	ENST00000295887	6.8269	5.81072	4.64156	3.24849	2.05984	2.59705	-0.232515	-0.514842	0.334343	A5_target
CDS2	ENSG00000101290	ENST00000460006	7.92556	8.40396	6.05134	7.80212	9.06823	8.9024	0.0845564	0.366612	-0.026627	A5_target
CDT1	ENSG00000167513	ENST00000301019	64.9114	73.0437	119.766	145.578	121.238	103.935	0.170288	0.281579	-0.222167	non_target
CDV3	ENSG00000091527	ENST00000264993	84.106	83.2379	60.1433	53.2	37.2649	50.1206	-0.0149685	-0.176977	0.427589	non_target
CDX2	ENSG00000165556	ENST00000381020	13.7212	12.3494	17.3097	17.7511	23.955	18.8406	-0.151968	0.0363238	-0.346481	A5_target
CDYL	ENSG00000153046	ENST00000328908	11.7232	13.0192	16.0638	16.537	7.5521	11.2191	0.151272	0.041885	0.571004	A5_target
CDYL2	ENSG00000166446	ENST00000562812	1.26954	1.96346	3.72865	3.94725	0.668134	1.28212	0.629097	0.0821935	0.940323	A5_target
CEACAM19	ENSG00000186567	ENST00000403660	3.90012	4.09399	12.6539	12.3246	0.962264	0.745719	0.0699879	-0.0380346	-0.367799	A5_target
CEBPA	ENSG00000245848	ENST00000498907	10.677	9.98298	21.726	18.6776	19.4596	15.1804	-0.0969655	-0.218115	-0.358273	non_target
CEBPB	ENSG00000172216	ENST00000303004	3.61959	3.90807	25.9809	24.9243	5.86354	4.20989	0.11063	-0.0599027	-0.47799	non_target
[truncated: 10,204 more rows]

## Sheet: Table S2
Supplementary Table 2. Sequences of primers used in this study.
Primers for shRNA plasmids construction
shALKBH5-1	GAAAGGCTGTTGGCATCAATA
shALKBH5-2	CCTCAGGAAGACAAGATTAGA
Primers for RT-qPCR
GAPDH-F	5’-﻿ATGGCAAATTCCATGGCACC-3’
GAPDH-R	5’-﻿GACTCCACGACGTACTCAGC-3’
β-ACTIN-F	5’-﻿CACCATTGGCAATGAGCGGTTC-3’
β-ACTIN-R	5’-﻿AGGTCTTTGCGGATGTCCACGT-3’
ALKBH5-F	5’-﻿CCTCAGGAAGACAAGATTAGA-3’
ALKBH5-R	5’-﻿TGACAGGCGATCTGAAGC-3’
CDKN1A-F	5’-﻿ACAGCAGAGGAAGACCATGTG-3’
CDKN1A-R	5’-﻿GGAGTGGTAGAAATCTGTCATGCT-3’
CDKN2B-F	5’-﻿GGGACTAGTGGAGAAGGTGC-3’
CDKN2B-R	5’-﻿CATCATCATGACCTGGATCGC-3’
CDH1-F	5’-CGAGAGCTACACGTTCACGG-3’
CDH1-R	5’-GGGTGTCGAGGGAAAAATAGG-3’
CDH2-F	5’-TCAGGCGTCTGTAGAGGCTT-3’
CDH2-R	5’-ATGCACATCCTTCGATAAGACTG-3’
PRELID1-F	5’-CTTGACGGAAGACATAGTACACC-3’
PRELID1-R	5’-ACATTGGCAGGAAATAGTCGC-3’
SNAL1-F	5’-TCGGAAGCCTAACTACAGCGA-3’
SNAL1-R	5’-AGATGAGCATTGGCAGCGAG-3’
BRCA1-F	5’-ACCTTGGAACTGTGAGAACTCT-3’
BRCA1-R	5’-TCTTGATCTCCCACACTGCAATA-3’
TP53BP1-F	5’-ATGGACCCTACTGGAAGTCAG-3’
TP53BP1-R	5’-TTTCTTTGTGCGTCTGGAGATT-3’
PALB1-F	5’-AGGATCTCTCACCGCAGCTAA-3’
PALB1-R	5’-TCAGGCCCAACATCAAGTGTG-3’
Rad51-F	5’-CAACCCATTTCACGGTTAGAGC-3’
Rad51-R	5’-TTCTTTGGCGCATAGGCAACA-3’

## Sheet: Table S3
Supplementary Table 3. Antibodies used in this study.
Antibodies	Vendor	Catalog No.	Dilution
Primary Antibodies
Rabbit polyclonal anti-ALKBH5	Proteintech	Cat# 16837-1-AP	1:5000
Mouse monoclonal anti-γH2AX	Sigma-Aldrich	Cat# 16-202A	3 μg/mL
Rabbit monoclonal anti-H2AX	Cell signaling Technology	Cat# 7631	1:1000
Rabbit polyclonal anti-ACTB	Proteintech	Cat# 23660-1-AP	1:5000
Rabbit polyclonal anti-m6A	Synaptic Systems	Cat# 202 003	7.5 μg/mL
Rabbit polyclonal anti-YTHDF1	Proteintech	Cat# 17479-1-AP	1:3000
Rabbit polyclonal anti-YTHDF2	Proteintech	Cat# 24744-1-AP	1:5000
Rabbit polyclonal anti-YTHDF3	Proteintech	Cat# 25537-1-AP	1:10000
Rabbit polyclonal anti-P15	Abclonal	Cat# A5685	1:500
Rabbit polyclonal anti-P21	Proteintech	Cat# 10355-1-AP	1:10000
Rabbit monoclonal anti-H3K9ac	PTM-BIO	Cat# PTM-112RM	1:5000
Mouse monoclonal anti-H4K16ac	PTM-BIO	Cat# PTM-187	1:1000
Rabbit monoclonal anti-H3K27ac	PTM-BIO	Cat# PTM-116RM	1:2000
Mouse monoclonal anti-H3	PTM-BIO	Cat# PTM-1001RM	1:500
Rabbit monoclonal anti-H4	PTM-BIO	Cat# PTM-1015RM	1:5000
Secondary Antibodies
Goat anti-Mouse IgG (H+L) Cross-Adsorbed Secondary Antibody, Alexa Fluor 488	Invitrogen	Cat# A-11004	1:1000
HRP-conjugated Goat Anti-Rabbit IgG(H+L)	Proteintech	Cat# SA00001-2	1:3000
HRP-conjugated Goat Anti-Mouse IgG(H+L)	Proteintech	Cat# SA00001-1	1:3000
